# Supplementary material
Source: Royal Society of Chemistry journal article supplement (doi:10.1039/d6nj00711b)

## Supporting Information

# DBU Mediated Thiocyanate and Selenocyanate Activation Enables Transition-Metal-Free Synthesis of Chalcogen-Linked Heterocycles

Pallavi Saha<sup>a</sup>, Deepak K Sharma<sup>\*a</sup>

<sup>a</sup>Department of Pharmaceutical Engg. And Tech., IIT-Banaras Hindu University, Varanasi, UP, 221005, email id: [deepak.phe@itbhu.ac.in](mailto:deepak.phe@itbhu.ac.in)

## Table of Contents

|     |                                                                                |         |
|-----|--------------------------------------------------------------------------------|---------|
| 1.  | General information.....                                                       | S2      |
| 2.  | General procedure for the synthesis of compounds <b>1a-1m</b> .....            | S3      |
| 3.  | General procedure for the synthesis of compound <b>6a</b> .....                | S3      |
| 4.  | General procedure for the synthesis of compounds <b>6b, 6c</b> .....           | S3-S4   |
| 5.  | General procedure for the synthesis of compounds <b>3a-3m</b> .....            | S4      |
| 6.  | General procedure for the synthesis of compounds <b>5a-5f</b> .....            | S4      |
| 7.  | General procedure for the synthesis of compounds <b>7a</b> and <b>7b</b> ..... | S4      |
| 8.  | General procedure for the synthesis of compounds <b>8a-8i</b> .....            | S4-S5   |
| 9.  | General procedure for the synthesis of compounds <b>8j</b> .....               | S5      |
| 10. | General procedure for the synthesis of compounds <b>9a-9c</b> .....            | S5      |
| 11. | Gram scale synthesis of <b>3a</b> .....                                        | S6      |
| 12. | Control Experiments.....                                                       | S7-S9   |
| 13. | Spectral Data.....                                                             | S10-S25 |
| 14. | <sup>1</sup> H and <sup>13</sup> C NMR Spectra.....                            | S26-S86 |

## General information

All chemicals were obtained from TCI Chemicals, SRL Chemicals, and BLD Pharma and used without further purification. Molychem silica gel (60-120 mesh and 100-200 mesh) was utilized for column chromatography, while thin-layer chromatography employed Merck pre-coated silica gel 60-F254 plates. Additional chemicals and solvents were sourced commercially and purified using standard procedures.  $^1\text{H}$  and  $^{13}\text{C}$  NMR spectra were recorded on Bruker Avance spectrometers. Data are reported as follows: chemical shift, integration, multiplicity (br = broad, s = singlet, d = doublet, dd = double doublet, t = triplet, q = quartet, dt = doublet of triplets, td = triplet of doublets, m = multiplet), and coupling constants in hertz (Hz).

**General procedure for the synthesis of compounds 1a-1m:**

An oven-dried round bottom flask was charged with the corresponding 2-aryl-imidazo[1,2-*a*]pyridines (1 mmol), KSCN (2 equiv.), K<sub>2</sub>S<sub>2</sub>O<sub>8</sub> (1 equiv.) in 2 mL of H<sub>2</sub>O. The reaction mixture was stirred at room temperature for 6 h under irradiation of blue LED light (24 W, 455 nm), at a distance of 10-12 cm away from light source, in open air. After completion of reaction, the reaction mixture was extracted with ethyl acetate (15 mL × 3). The combined organic layers were washed with brine, dried over Na<sub>2</sub>SO<sub>4</sub>, and concentrated in vacuum. The residue was purified by column chromatography on silica gel using a solvent system of ethyl acetate/*n*-hexane to afford the desired product.

**General procedure for the synthesis of compounds 4a-4f:**

An oven-dried round bottom flask was charged with the corresponding 2-mercaptobenzo[*d*]thiazoles (1 mmol), NH<sub>4</sub>SCN (2 equiv.), Rose Bengal (1 mol %) in 2 ml of CH<sub>3</sub>CN. The reaction mixture was stirred at room temperature for 6 h under irradiation of blue LED light (24 W, 455 nm), at a distance of 10-12 cm away from light source, in open air. After completion of reaction, the reaction mixture was extracted with ethyl acetate (15 mL × 3). The combined organic layers were washed with brine, dried over Na<sub>2</sub>SO<sub>4</sub>, and concentrated in vacuum. The residue was purified by column chromatography on silica gel using a solvent system of ethyl acetate/*n*-hexane to afford the desired product.

**General procedure for the synthesis of compound 6a:**

An oven-dried round bottom flask was charged with the corresponding 3-aryl-imidazo[1,5-*a*]pyridine (1 mmol), KSCN (2 equiv.), K<sub>2</sub>S<sub>2</sub>O<sub>8</sub> (1 equiv.) in 2 mL of H<sub>2</sub>O. The reaction mixture was stirred at room temperature for 6 h under irradiation of blue LED light (24 W, 455 nm), at a distance of 10-12 cm away from light source, in open air. After completion of reaction, the reaction mixture was extracted with ethyl acetate (15 mL × 3). The combined organic layers were washed with brine, dried over Na<sub>2</sub>SO<sub>4</sub>, and concentrated in vacuum. The residue was purified by column chromatography on silica gel using a solvent system of ethyl acetate/*n*-hexane to afford the desired product.

**General procedure for the synthesis of compounds 6b, 6c:**

An oven-dried round bottom flask was charged with indole and aza-indole (1 mmol), KSCN (2 equiv.), K<sub>2</sub>S<sub>2</sub>O<sub>8</sub> (1 equiv.) in 2 mL of H<sub>2</sub>O. The reaction mixture was stirred at room temperature for 6 h under irradiation of blue LED light (24 W, 455 nm), at a distance of 10-12 cm away from light source, in open air. After completion of reaction, the reaction mixture was extracted with ethyl acetate (15 mL × 3). The

combined organic layers were washed with brine, dried over Na<sub>2</sub>SO<sub>4</sub>, and concentrated in vacuum. The residue was purified by column chromatography on silica gel using a solvent system of ethyl acetate/*n*-hexane to afford the desired product.

**General procedure for the synthesis of compounds 3a-3m:**

An oven-dried sealed tube was charged with the corresponding 3-thiocyanato-2-aryl-imidazo[1,2-*a*]pyridines, (**1a-1m**, 0.5 mmol), 2-bromo-*N*-cyclohexylacetamide (**2a**, 0.5 mmol, 1 equiv.), DBU (0.5 mmol, 1 equiv., 76.12 mg), in 3 mL of DMF. The reaction mixture was stirred at room temperature for 5 min. On completion of the reaction, the reaction mixture was extracted with ethyl acetate (15 mL×3). The combined organic layers were washed with brine, dried over Na<sub>2</sub>SO<sub>4</sub>, and concentrated in vacuum. The residue was purified by column chromatography on silica gel using a solvent system of ethyl acetate/*n*-hexane to afford the desired product.

**General procedure for the synthesis of compounds 5a-5f:**

An oven-dried sealed tube was charged with the corresponding 2-thiocyanatobenzo[*d*]thiazoles, (**4a-4f**, 0.5 mmol), 2-bromo-*N*-cyclohexylacetamide (**2a**, 0.5 mmol, 1 equiv.), DBU (0.5 mmol, 1 equiv., 76.12 mg), in 3 mL of DMF. The reaction mixture was stirred at room temperature for 5 min. On completion of the reaction, next reaction mixture was extracted with ethyl acetate (15 mL×3). The combined organic layers were washed with brine, dried over Na<sub>2</sub>SO<sub>4</sub>, and concentrated in vacuum. The residue was purified by column chromatography on silica gel using a solvent system of ethyl acetate/*n*-hexane to afford the desired product.

**General procedure for the synthesis of compounds 7a and 7b:**

An oven-dried sealed tube was charged with the corresponding thiocyanato-heterocycles (**6a**, or **6b**, 0.5 mmol), 2-bromo-*N*-cyclohexylacetamide (**2a**, 0.5 mmol, 1 equiv.), DBU (0.5 mmol, 1 equiv., 76.12 mg), in 3 mL of DMF. The reaction mixture was stirred at room temperature for 5 min. On completion of the reaction, the reaction mixture was extracted with ethyl acetate (15 mL×3). The combined organic layers were washed with brine, dried over Na<sub>2</sub>SO<sub>4</sub>, and concentrated in vacuum. The residue was purified by column chromatography on silica gel using a solvent system of ethyl acetate/*n*-hexane to afford the desired product.

**General procedure for the synthesis of compounds 8a-8i:**

An oven-dried sealed tube was charged with the corresponding 3-thiocyanato-2-aryl-imidazo[1,2-*a*]pyridines, (0.5 mmol), the respective bromoalkane derivative (0.5 mmol, 1 equiv.), DBU (0.5 mmol, 1 equiv., 76.12 mg), in 3 mL of DMF. The reaction mixture was stirred at room temperature for appropriate time. On completion of the reaction, the reaction mixture was extracted with ethyl acetate (15 mL×3). The combined organic layers were washed with brine, dried over Na<sub>2</sub>SO<sub>4</sub>, and concentrated in vacuum. The residue was purified by column chromatography on silica gel using a solvent system of ethyl acetate/*n*-hexane to afford the desired product.

**General procedure for the synthesis of compounds 8j:**

An oven-dried sealed tube was charged with the 3-thiocyanato-2-phenyl-imidazo[1,2-*a*]pyridines, (0.5 mmol), the benzyl bromide/ pseudohalide substituted derivative (0.5 mmol, 1 equiv.), DBU (0.5 mmol, 1 equiv., 76.12 mg), in 3 mL of DMF. The reaction mixture was stirred at room temperature for 45 min. On completion of the reaction, the reaction mixture was extracted with ethyl acetate (15 mL×3). The combined organic layers were washed with brine, dried over Na<sub>2</sub>SO<sub>4</sub>, and concentrated in vacuum. The residue was purified by column chromatography on silica gel using a solvent system of ethyl acetate/*n*-hexane to afford the desired product.

On using benzyl bromide as reaction substrate, isolated yield of 89 % was noted for compound **8j**.

On using benzyl trifluoromethanesulfonate as reaction substrate, isolated yield of 79 % was noted for compound **8j**.

On using benzyl 1,1,2,2,3,3,4,4,4-nonafluorobutane-1-sulfonate reaction substrate, isolated yield of 82 % was noted for compound **8j**.

On using benzyl 4-methylbenzenesulfonate reaction substrate, isolated yield of 85 % was noted for compound **8j**.

**General procedure for the synthesis of compounds 9a-9c:**

An oven-dried sealed tube was charged with the 3-selenocyanato-2-phenyl-imidazo[1,2-*a*]pyridines, (0.5 mmol), the respective bromoalkene derivative, and benzyl bromide (0.5 mmol, 1 equiv.), DBU (0.5 mmol, 1 equiv., 76.12 mg), in 3 mL of DMF. The reaction mixture was stirred at room temperature for 5 min. On completion of the reaction, the reaction mixture was extracted with ethyl acetate (15 mL×3). The combined organic layers were washed with brine, dried over Na<sub>2</sub>SO<sub>4</sub>, and concentrated in vacuum. The

residue was purified by column chromatography on silica gel using a solvent system of ethyl acetate/*n*-hexane to afford the desired product.

### Gram Scale Synthesis of **3a**:

An oven-dried sealed tube was charged with the 3-thiocyanato-2-phenylimidazo[1,2-*a*]pyridines, (**1a**, 7 mmol), 2-bromo-*N*-cyclohexylacetamide (**2a**, 7 mmol, 1 equiv.), DBU (1 equiv., 7 mmol, 1.06 gm), in 15 mL of DMF. The reaction mixture was stirred at room temperature for 20 min. On completion of the reaction, next reaction mixture was extracted with ethyl acetate (20 mL × 3). The combined organic layers were washed with brine, dried over Na<sub>2</sub>SO<sub>4</sub>, and concentrated in vacuum. The residue was purified by column chromatography on silica gel using a solvent system of ethyl acetate/*n*-hexane to afford the desired product.

### Scheme S1: Gram-scale synthesis of **3a**.<sup>a</sup>

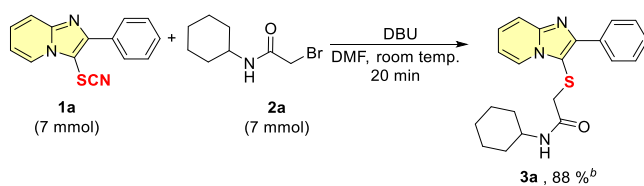

<sup>a</sup>Reaction conditions: **1a** (7 mmol), **2a** (7 mmol), DMF (15 mL), DBU (0.5 mmol, 1 equiv.), room temp. (25-30 °C), 20 min, <sup>b</sup>Isolated yield.

## Control Experiments

(a) Reaction in absence of DBU:

An oven-dried sealed tube was charged with the 3-thiocyanato-2-phenylimidazo[1,2-*a*]pyridines (**1a**, 0.5 mmol), 2-bromo-*N*-cyclohexylacetamide (**2a**, 0.5 mmol, 1 equiv), in 3 mL of DMF. The reaction mixture was stirred at room temperature for 1 h. After 1 h, next the reaction mixture was extracted with ethyl acetate (15 mL×3). The combined organic layers were washed with brine, dried over Na<sub>2</sub>SO<sub>4</sub>, and concentrated in vacuum. The residue was purified by column chromatography on silica gel using a solvent system of ethyl acetate/*n*-hexane to afford the respective product.

(b) Reaction in nitrogen environment:

An oven-dried sealed tube was charged with the 3-thiocyanato-2-phenylimidazo[1,2-*a*]pyridines (**1a**, 0.5 mmol), 2-bromo-*N*-cyclohexylacetamide (**2a**, 0.5 mmol, 1 equiv.), DBU (1 equiv., 0.5 mmol, 76.12 mg), in 3 mL of DMF under nitrogen atmosphere. The reaction mixture was stirred at room temperature for 5 min. On completion of the reaction, next reaction mixture was extracted with ethyl acetate (15 mL × 3). The combined organic layers were washed with brine, dried over Na<sub>2</sub>SO<sub>4</sub>, and concentrated in vacuum. The residue was purified by column chromatography on silica gel using a solvent system of ethyl acetate/*n*-hexane to afford the desired product.

(c) Reaction in dark environment:

An oven-dried sealed tube was charged with the 3-thiocyanato-2-phenylimidazo[1,2-*a*]pyridines (**1a**, 0.5 mmol), 2-bromo-*N*-cyclohexylacetamide (**2a**, 0.5 mmol, 1 equiv.), DBU (1 equiv., 0.5 mmol, 76.12 mg), in 3 mL of DMF. The reaction mixture was stirred at room temperature for 5 min under darkness. On completion of the reaction, next reaction mixture was extracted with ethyl acetate (15 mL × 3). The combined organic layers were washed with brine, dried over Na<sub>2</sub>SO<sub>4</sub>, and concentrated in vacuum. The residue was purified by

column chromatography on silica gel using a solvent system of ethyl acetate/*n*-hexane to afford the desired product.

(d) Reaction with disulfenyl glucal:

An oven-dried sealed tube was charged with the diimidazopyridinyl disulfide (**1a**, 0.5 mmol), 2-bromo-*N*-cyclohexylacetamide (**2a**, 1 mmol, 1 equiv.), tri ethylamine (1 equiv., 0.5 mmol), in 3 mL of DMF. The reaction mixture was stirred at room temperature for 5 min. On completion of the reaction, next reaction mixture was extracted with ethyl acetate (15 mL×3). The combined organic layers were washed with brine, dried over Na<sub>2</sub>SO<sub>4</sub>, and concentrated in vacuum. The residue was purified by column chromatography on silica gel using a solvent system of ethyl acetate/*n*-hexane to afford the desired product.

(e) Reaction with radical scavenger TEMPO:

An oven-dried sealed tube was charged with the 3-thiocyanato-2-phenylimidazo[1,2-*a*]pyridines (**1a**, 0.5 mmol), 2-bromo-*N*-cyclohexylacetamide (**2a**, 0.5 mmol, 1 equiv.), DBU (1 equiv., 0.5 mmol, 76.12 mg), TEMPO (1.25 mmol, 2.5 equiv., 195.3 mg), in 3 mL of DMF. The reaction mixture was stirred at room temperature for 5 min. On completion of the reaction, next reaction mixture was extracted with ethyl acetate (15 mL× 3). The combined organic layers were washed with brine, dried over Na<sub>2</sub>SO<sub>4</sub>, and concentrated in vacuum. The residue was purified by column chromatography on silica gel using a solvent system of ethyl acetate/*n*-hexane to afford the desired product.

(f) Reaction with radical scavenger BHT:

An oven-dried sealed tube was charged with the 3-thiocyanato-2-phenylimidazo[1,2-*a*]pyridines (**1a**, 0.5 mmol), 2-bromo-*N*-cyclohexylacetamide (**2a**, 0.5 mmol, 1 equiv.), DBU (1 equiv., 0.5 mmol, 76.12 mg), BHT (1.25 mmol, 2.5 equiv.), in 3 mL of DMF. The reaction mixture was stirred at room temperature for 5 min. On completion of the reaction, next reaction mixture was extracted with ethyl acetate (15 mL× 3). The combined organic layers were washed with brine, dried over Na<sub>2</sub>SO<sub>4</sub>, and concentrated in vacuum. The residue was purified by column chromatography on silica gel using a solvent system of ethyl acetate/*n*-hexane to afford the desired product.

**Scheme S2.** Control Experiments.<sup>a</sup>

### CONTROL EXPERIMENTS

(a) Reaction in absence of DBU:

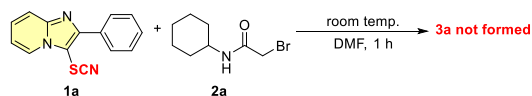

(b) Reaction in nitrogen environment:

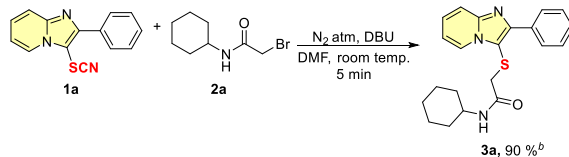

(c) Reaction in darkness:

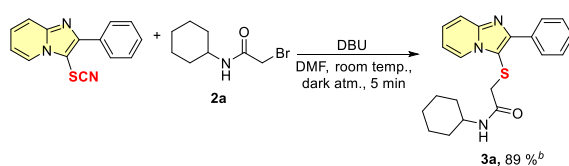

(d) Reaction with diimidazopyridinyl disulfide (1aa):

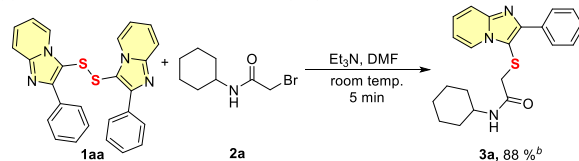

(e) Reaction with radical scavenger TEMPO:

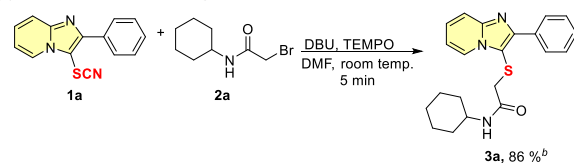

(f) Reaction with radical scavenger BHT:

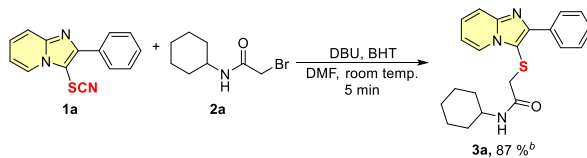

<sup>a</sup>Reaction conditions: (a) **1a** (0.5 mmol), **2a** (0.5 mmol, 1 equiv.), DMF (3 mL), room temp. (25-30 °C), 1 h; (b) **1a** (0.5 mmol), **2a** (0.5 mmol, 1 equiv.), DBU (0.5 mmol, 1 equiv.), DMF (3 mL), N<sub>2</sub> atmosphere, room temp. (25-30 °C), 5 min; (c) **1a** (0.5 mmol), **2a** (0.5 mmol, 1 equiv.), DBU (0.5 mmol, 1 equiv.), DMF (3 mL), dark atmosphere, room temp. (25-30 °C), 5 min; (d) **1aa** (0.5 mmol), **2a** (1 mmol, 2 equiv.), Et<sub>3</sub>N (0.5 mmol, 1 equiv.), DMF (3 mL), room temp. (25-30 °C), 5 min; (e) **1a** (0.5 mmol), **2a** (0.5 mmol, 1 equiv.), TEMPO (1.5 mmol, 3 equiv.), DBU (0.5 mmol, 1 equiv.), DMF (3 mL), room temp. (25-30 °C), 5 min; (f) **1a** (0.5 mmol), **2a** (0.5 mmol, 1 equiv.), DBU (1 equiv., 0.5 mmol), BHT (1.5 mmol, 3 equiv.), DMF (3 mL), room temp. (25-30 °C), 5 min. <sup>b</sup>Isolated yield.

## Spectral Data

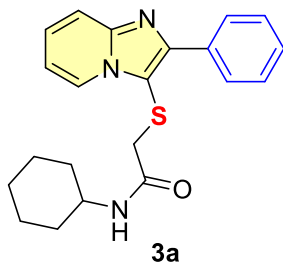

***N*-cyclohexyl-2-((2-phenylimidazo[1,2-*a*]pyridin-3-yl)thio)acetamide (3a):** The compound was purified by silica gel column chromatography using ethyl acetate/*n*-hexane (35 %) as a mixed eluent to give **3a** as white solid, in 93 % yield.  $^1\text{H}$  NMR ( $\text{CDCl}_3$ , 600 MHz)  $\delta$  (ppm) 8.5 (d,  $J = 7.2$  Hz, 1H), 8.23 (d,  $J = 7.8$  Hz, 2H), 7.67 (d,  $J = 7.8$  Hz, 1H), 7.51 (t,  $J = 7.2$  Hz, 2H), 7.42 (t,  $J = 7.2$ , 1H), 7.43-7.32 (m, 1H), 6.97 (t,  $J = 7.2$  Hz, 1H), 5.76 (d,  $J = 6.6$  Hz, 1H), 3.39-3.36 (m, 1H), 3.27 (s, 2H), 1.51-1.49 (m, 3H), 1.42 (d,  $J = 10.2$  Hz, 2H), 1.14-1.12 (m, 2H), 0.96-0.9 (m, 1H), 0.52-0.46 (m, 2H);  $^{13}\text{C}\{^1\text{H}\}$  NMR ( $\text{CDCl}_3$ , 150 MHz,)  $\delta$  (ppm) 166.3, 149.9, 146.8, 133.5, 128.8, 128.7, 128.6, 126.6, 124.5, 117.7, 113.2, 108.1, 48.6, 38.5, 32, 25.1, 24.7. HRMS (ESI-TOF)  $m/z$ :  $[\text{M}+\text{H}]^+$  Calcd. for  $\text{C}_{21}\text{H}_{24}\text{N}_3\text{OS}$ : 366.1635; found 366.1632.

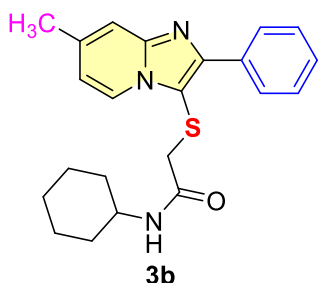

***N*-cyclohexyl-2-((7-methyl-2-phenylimidazo[1,2-*a*]pyridin-3-yl)thio)acetamide (3b):** The compound was purified by silica gel column chromatography using ethyl acetate/*n*-hexane (45 %) as a mixed eluent to give **3b** as pale white solid, in 93 % yield.  $^1\text{H}$  NMR ( $\text{CDCl}_3$ , 600 MHz)  $\delta$  (ppm) 8.34 (d,  $J = 6.6$  Hz, 1H), 8.20 (d,  $J = 7.2$  Hz, 1H), 7.49 (t,  $J = 7.8$  Hz, 2H), 7.41-7.40 (m, 2H), 6.78 (d,  $J = 6.6$  Hz, 1H), 5.84 (d,  $J = 7.2$  Hz, 1H), 3.40-3.34 (m, 1H), 3.23 (s, 2H), 2.43 (s, 3H), 1.51-1.49 (m, 3H), 1.43 (d,  $J = 10.8$  Hz, 2H), 1.16-1.11 (m, 2H), 0.96-0.90 (m, 1H), 0.53-0.47 (m, 2H);  $^{13}\text{C}\{^1\text{H}\}$  NMR ( $\text{CDCl}_3$ , 150 MHz)  $\delta$  (ppm) 166.5, 149.8, 147.2, 137.8, 133.7, 128.7, 128.6, 128.5, 123.7, 116.2, 115.7, 107.4, 48.7, 38.7, 32.1, 25.2, 24.7, 21.4. HRMS (ESI-TOF)  $m/z$ :  $[\text{M}+\text{H}]^+$  Calcd. for  $\text{C}_{22}\text{H}_{26}\text{N}_3\text{OS}$ : 380.1792; found 380.1796.

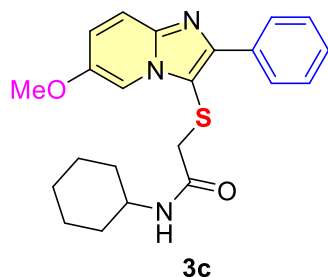

***N*-cyclohexyl-2-((6-methoxy-2-phenylimidazo[1,2-*a*]pyridin-3-yl)thio)acetamide (3c):** The compound was purified by silica gel column chromatography using ethyl acetate/*n*-hexane (55 %) as a mixed eluent to give **3c** as pale white solid, in 92 % yield. <sup>1</sup>H NMR (CDCl<sub>3</sub>, 600 MHz) δ (ppm) 8.20 (d, *J* = 7.2 Hz, 2H), 8.03 (d, *J* = 2.4 Hz, 1H), 7.53 (d, *J* = 9.6 Hz, 1H), 7.49 (t, *J* = 7.8 Hz, 2H), 7.40 (t, *J* = 7.8 Hz, 1H), 7.10 (dd, *J* = 9.6 Hz, 3.6 Hz, 1H), 5.79 (d, *J* = 7.8 Hz, 1H), 3.91 (s, 3H), 3.41-3.36 (m, 1H), 3.25 (s, 2H), 1.98 (s, 1H), 1.51-1.49 (m, 3H), 1.42 (d, *J* = 10.2 Hz, 2H), 1.16-1.10 (m, 2H), 0.96-0.89 (m, 1H), 0.54-0.47 (m, 2H); <sup>13</sup>C{<sup>1</sup>H} NMR (CDCl<sub>3</sub>, 150 MHz) δ (ppm) 166.5, 150.0, 149.7, 143.7, 133.7, 128.7, 128.5, 128.4, 121.6, 117.9, 108.8, 106.4, 56.4, 48.7, 38.5, 32.1, 25.2, 24.7. HRMS (ESI-TOF) *m/z*: [M+H]<sup>+</sup> Calcd. for C<sub>22</sub>H<sub>26</sub>N<sub>3</sub>O<sub>2</sub>S: 396.1741; found 396.1753.

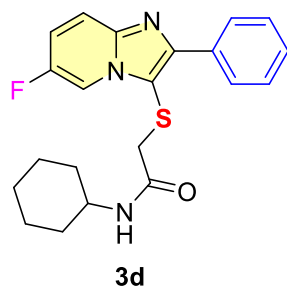

***N*-cyclohexyl-2-((6-fluoro-2-phenylimidazo[1,2-*a*]pyridin-3-yl)thio)acetamide (3d):** The compound was purified by silica gel column chromatography using ethyl acetate/*n*-hexane (40 %) as a mixed eluent to give **3d** as pale white solid, in 85 % yield. <sup>1</sup>H NMR (CDCl<sub>3</sub>, 600 MHz) δ (ppm) 8.35 (s, 1H), 8.11 (d, *J* = 7.2 Hz, 2H), 7.55-7.53 (m, 1H), 7.42 (t, *J* = 7.2 Hz, 2H), 7.34 (t, *J* = 6.6 Hz, 1H), 7.15 (t, *J* = 8.4 Hz, 1H), 5.78 (d, *J* = 6 Hz, 1H), 3.33 (d, *J* = 7.8 Hz, 1H), 3.17 (s, 2H), 1.44-1.39 (m, 5H), 1.11-1.07 (m, 2H), 0.88-0.84 (m, 1H), 0.51-0.45 (m, 2H); <sup>13</sup>C{<sup>1</sup>H} NMR (CDCl<sub>3</sub>, 150 MHz) δ (ppm) 166.3, 153.8 (d, *J*<sub>F-C</sub> = 237.3 Hz), 151.0, 144.3, 133.3, 128.8, 128.5, 118.5 (d, *J*<sub>F-C</sub> = 25.5 Hz), 118.2 (d, *J*<sub>F-C</sub> = 8.5 Hz), 111.61 (d, *J*<sub>F-C</sub> = 41.5 Hz), 109.9, 48.7, 38.5, 32.1, 25.2, 24.7. HRMS (ESI-TOF) *m/z*: [M+H]<sup>+</sup> Calcd. for C<sub>21</sub>H<sub>23</sub>FN<sub>3</sub>OS: 384.1541; found 384.1545.

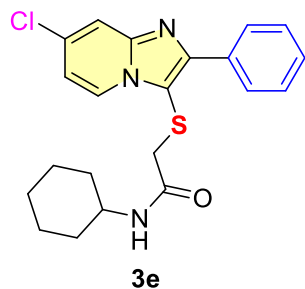

**2-((7-Chloro-2-phenylimidazo[1,2-*a*]pyridin-3-yl)thio)-*N*-cyclohexylacetamide (3e):** The compound was purified by silica gel column chromatography using ethyl acetate/*n*-hexane (45 %) as a mixed eluent to give **3e** as pale white solid, in 87 % yield. <sup>1</sup>H NMR (CDCl<sub>3</sub>, 600 MHz) δ (ppm) 8.47 (d, *J* = 7.2 Hz, 1H), 8.22 (d, *J* = 7.8 Hz, 1H); <sup>13</sup>C{<sup>1</sup>H} NMR (CDCl<sub>3</sub>, 150 MHz) δ (ppm) 166.2, 150.7, 146.5, 133.3, 133.2, 128.9, 128.8, 128.6, 125.1, 116.5, 114.7, 108.8, 48.7, 38.9, 32.2, 25.2, 24.7. HRMS (ESI-TOF) *m/z*: [M+H]<sup>+</sup> Calcd. for C<sub>21</sub>H<sub>23</sub>ClN<sub>3</sub>OS: 400.1245; found 400.1242.

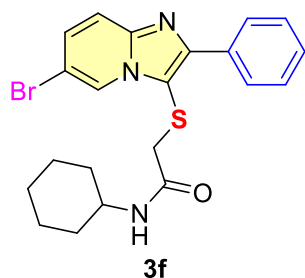

**2-((6-Bromo-2-phenylimidazo[1,2-*a*]pyridin-3-yl)thio)-*N*-cyclohexylacetamide (3f):**

The compound was purified by silica gel column chromatography using ethyl acetate/*n*-hexane (45 %) as a mixed eluent to give **3f** as pale white solid, in 88 % yield. <sup>1</sup>H NMR (DMSO-*d*<sub>6</sub>, 600 MHz) δ (ppm) 8.72 (d, *J* = 1.2 Hz, 1H), 8.25 (d, *J* = 7.2 Hz, 2H), 7.84 (d, *J* = 7.2 Hz, 1H), 7.65 (d, *J* = 9 Hz, 1H), 7.54 (dd, *J* = 9.6 Hz, 1.8 Hz, 1H), 7.49 (t, *J* = 7.8 Hz, 2H), 7.42 (t, *J* = 7.2 Hz, 1H), 3.33 (s, 2H), 3.30 (s, 1H), 1.58-1.52 (m, 2H), 1.48-1.43 (m, 3H), 1.18-1.12 (m, 2H), 1.05-0.99 (m, 1H), 0.90-0.80 (m, 2H); <sup>13</sup>C{<sup>1</sup>H} NMR (DMSO-*d*<sub>6</sub>, 150 MHz) δ (ppm) 167.7, 144.9, 133.7, 130.2, 128.9, 128.8, 128.4, 125.9, 118.5, 110.4, 107.5, 48.4, 39.2, 32.3, 25.5, 24.8. HRMS (ESI-TOF) *m/z*: [M+H]<sup>+</sup> Calcd. for C<sub>21</sub>H<sub>23</sub>BrN<sub>3</sub>OS: 444.0740; found 444.0736.

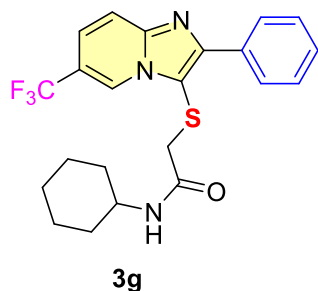

***N*-cyclohexyl-2-((2-phenyl-6-(trifluoromethyl)imidazo[1,2-*a*]pyridin-3-yl)thio)acetamide**

**(3g):** The compound was purified by silica gel column chromatography using ethyl acetate/*n*-hexane (35 %) as a mixed eluent to give **3g** as pale white solid, in 85 % yield. <sup>1</sup>H NMR (CDCl<sub>3</sub>, 600 MHz) δ (ppm) 8.62 (d, *J* = 7.2 Hz, 1H), 8.21 (d, *J* = 7.8 Hz, 2H), 7.90 (s, 1H), 7.48 (t, *J* = 7.2 Hz, 2H), 7.41 (d, *J* = 6.6 Hz, 1H), 7.10 (d, *J* = 7.2 Hz, 1H), 5.86 (d, *J* = 7.8 Hz, 1H), 3.39-3.40 (m, 1H), 3.18 (s, 2H), 1.51-1.50 (m, 2H), 1.41 (d, *J* = 11.4 Hz, 2H), 1.17-1.11 (m, 2H), 0.97-0.91 (m, 1H), 0.60-0.54 (m, 2H); <sup>13</sup>C {<sup>1</sup>H} NMR (CDCl<sub>3</sub>, 150 MHz) δ (ppm) 166.34, 151.30, 144.82, 132.87, 129.1, 128.8, 128.4, 125.8, 123.1 (d, *J*<sub>F-C</sub> = 271.5 Hz), 115.3 (q, *J*<sub>F-C</sub> = 10.5 Hz), 110.6, 108.7, 108.7, 48.7, 38.8, 32.2, 25.2, 24.6. HRMS (ESI-TOF) *m/z*: [M+H]<sup>+</sup> Calcd. for C<sub>22</sub>H<sub>23</sub>F<sub>3</sub>N<sub>3</sub>OS: 434.1509; found 434.1511.

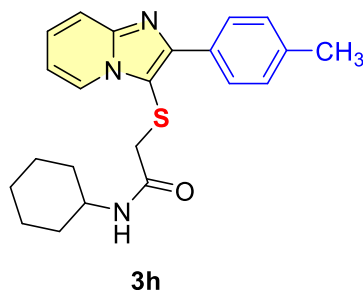

***N*-cyclohexyl-2-((2-(*p*-tolyl)imidazo[1,2-*a*]pyridin-3-yl)thio)acetamide (3h):**

The compound was purified by silica gel column chromatography using ethyl acetate/*n*-hexane (50 %) as a mixed eluent to give **3h** as pale white solid, in 90 % yield. <sup>1</sup>H NMR (CDCl<sub>3</sub>, 600 MHz) δ (ppm) 8.47 (d, *J* = 6.6 Hz, 1H), 8.11 (d, *J* = 7.8 Hz, 1H), 7.64 (d, *J* = 8.4 Hz, 1H), 7.31 (d, *J* = 7.8 Hz, 3H), 6.95 (t, *J* = 7.2 Hz, 2H), 5.80 (d, *J* = 7.2 Hz, 1H), 3.41-3.34 (m, 1H), 3.24 (s, 2H), 2.43 (s, 3H), 1.50 (d, *J* = 10.2 Hz, 3H), 1.43 (d, *J* = 10.2 Hz, 1H), 1.17-1.10 (m, 2H), 0.96-0.89 (m, 1H), 0.52-0.46 (m, 2H); <sup>13</sup>C {<sup>1</sup>H} NMR (CDCl<sub>3</sub>, 150 MHz) δ (ppm) 166.4, 150.1, 146.8, 138.7, 130.7, 129.5, 128.56 126.5, 124.5, 117.7, 113.0, 107.8, 48.6, 38.6, 32.0, 25.2, 24.7, 21.3. HRMS (ESI-TOF) *m/z*: [M+H]<sup>+</sup> Calcd. for C<sub>22</sub>H<sub>26</sub>N<sub>3</sub>OS: 380.1792; found 380.1793.

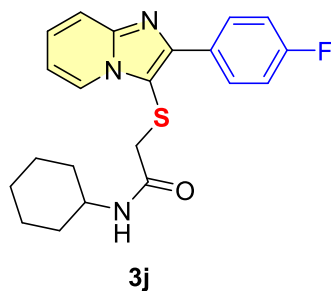

***N*-cyclohexyl-2-((2-(4-fluorophenyl)imidazo[1,2-*a*]pyridin-3-yl)thio)acetamide (3j):** The compound was purified by silica gel column chromatography using ethyl acetate/*n*-hexane (45 %) as a mixed eluent to give **3j** as pale white solid, in 90 % yield. <sup>1</sup>H NMR (CDCl<sub>3</sub>, 600 MHz) δ (ppm) 8.50 (d, *J* = 6.6 Hz, 1H), 8.25-8.23 (m, 2H), 7.64 (d, *J* = 9 Hz, 1H), 7.33 (t, *J* = 8.4 Hz, 2H), 6.97 (t, *J* = 6.6 Hz, 1H), 5.67 (d, *J* = 7.2 Hz, 1H), 3.44-3.37 (m, 1H), 3.25 (s, 1H), 1.82 (s, 1H), 1.54-1.46 (m, 5H), 1.19-1.13 (m, 2H), 1.00-0.94 (m, 1H), 0.60-0.54 (m, 2H); <sup>13</sup>C {<sup>1</sup>H} NMR (CDCl<sub>3</sub>, 150 MHz) δ (ppm) 166.4, 163.1 (d, *J*<sub>F-C</sub> = 247.9 Hz), 149.0, 146.8, 130.4 (d, *J*<sub>F-C</sub> = 9 Hz), 129.8 (d, *J*<sub>F-C</sub> = 3 Hz), 126.7, 124.6, 117.7, 115.7 (d, *J*<sub>F-C</sub> = 22.5 Hz), 113.2, 108.0, 48.7, 38.8, 32.2, 25.2, 24.7. HRMS (ESI-TOF) *m/z*: [M+H]<sup>+</sup> Calcd. for C<sub>21</sub>H<sub>23</sub>FN<sub>3</sub>OS: 384.1541; found 384.154.

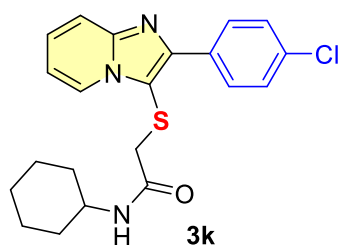

**2-((2-(4-Chlorophenyl)imidazo[1,2-*a*]pyridin-3-yl)thio)-*N*-cyclohexylacetamide (3k):**

The compound was purified by silica gel column chromatography using ethyl acetate/*n*-hexane (35%) as a mixed eluent to give **3k** as pale white solid, in 86 % yield. <sup>1</sup>H NMR (CDCl<sub>3</sub>, 600 MHz) δ (ppm) 8.50 (d, *J* = 6.6 Hz, 1H), 8.20 (d, *J* = 7.8 Hz, 2H), 7.65 (d, *J* = 9 Hz, 1H), 7.48 (d, *J* = 8.4 Hz, 2H), 7.34 (t, *J* = 7.8 Hz, 1 H), 6.98 (t, *J* = 6.6 Hz, 1 H), 5.67 (d, *J* = 6.6 Hz, 1 H), 3.42-3.37 (m, 2H), 3.25 (s, 2H), 1.82 (s, 1H), 1.55-1.53 (m, 3H), 1.46 (d, *J* = 10.8 Hz, 2 H), 1.20-1.13 (m, 2H), 1.02-0.96 (m, 1H); <sup>13</sup>C {<sup>1</sup>H} NMR (CDCl<sub>3</sub>, 150 MHz) δ (ppm) 166.3, 163.5, 148.8, 146.8, 134.8, 132.1, 129.9, 128.9, 126.8, 124.6, 117.8, 113.3, 108.4, 48.7, 38.8, 32.2, 25.2, 24.7. HRMS (ESI-TOF) *m/z*: [M+H]<sup>+</sup> Calcd. for C<sub>21</sub>H<sub>23</sub>ClN<sub>3</sub>OS: 400.1245; found 400.1240.

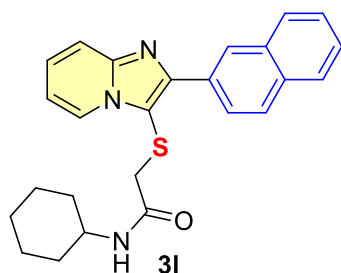

***N*-cyclohexyl-2-((2-(naphthalen-2-yl)imidazo[1,2-*a*]pyridin-3-yl)thio)acetamide (**3l**):**

The compound was purified by silica gel column chromatography using ethyl acetate/*n*-hexane (50 %) as a mixed eluent to give **3l** as pale white solid, in 84 % yield. <sup>1</sup>H NMR (CDCl<sub>3</sub>, 600 MHz) δ (ppm) 8.66 (s, 1H), 8.43 (d, *J* = 6.6 Hz, 1H), 8.31 (d, *J* = 8.4 Hz, 1H), 7.92-7.91 (m, 2H), 7.85-7.84 (m, 1H), 7.61 (d, *J* = 9 Hz, 1H), 7.50-7.48 (m, 2H), 7.27 (t, *J* = 7.8 Hz, 1H), 6.07 (t, *J* = 6.6 Hz, 1H), 6.07 (d, *J* = 7.8 Hz, 1H), 3.30-3.25 (m, 1H), 3.16 (s, 2H), 1.33-1.28 (m, 5H), 1.00-0.94 (m, 2H), 0.61-0.55 (m, 1H), 0.28-0.22 (m, 2H); <sup>13</sup>C{<sup>1</sup>H} NMR (CDCl<sub>3</sub>, 150 MHz) δ (ppm) 166.5, 149.7, 146.8, 133.5, 133.3, 130.9, 128.5, 128.2, 127.9, 127.6, 126.6, 126.6, 126.4, 126.1, 124.6, 117.6, 113.1, 108.7, 48.5, 38.7, 32.0, 25.0, 24.6. HRMS (ESI-TOF) *m/z*: [M+H]<sup>+</sup> Calcd. for C<sub>25</sub>H<sub>26</sub>N<sub>3</sub>OS: 416.1792; found 416.1766.

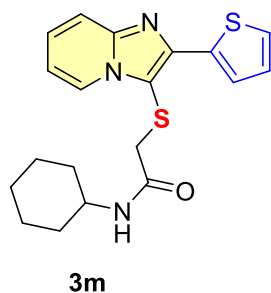

***N*-cyclohexyl-2-((2-(thiophen-2-yl)imidazo[1,2-*a*]pyridin-3-yl)thio)acetamide (**3m**):**

The compound was purified by silica gel column chromatography using ethyl acetate/*n*-hexane (50 %) as a mixed eluent to give **3m** as pale white solid, in 86 % yield. <sup>1</sup>H NMR (CDCl<sub>3</sub>, 600 MHz) δ (ppm) 8.49 (dd, *J* = 7.8 Hz, 1.2 Hz, 1H), 8.05 (dd, *J* = 4.2 Hz, 1.2 Hz, 1H), 7.62 (d, *J* = 10.8 Hz, 1H), 7.44 (dd, *J* = 6 Hz, 1.2 Hz, 1H), 7.34-7.30 (m, 1H), 7.20-7.18 (m, 1H), 6.95 (td, *J* = 7.8 Hz, 1.2 Hz, 1H), 5.76 (d, *J* = 9 Hz, 1H), 3.49-3.41 (m, 1H), 3.33 (m, 2H), 1.55-1.47 (m, 5H), 1.22-1.13 (m, 2H), 1.02-0.93 (m, 1H), 0.70-0.62 (m, 2H); <sup>13</sup>C{<sup>1</sup>H} NMR (CDCl<sub>3</sub>, 150 MHz) δ (ppm) 166.7, 146.9, 145.3, 136.4, 128.0, 126.9, 126.6, 124.76, 117.3, 113.2, 107.2, 48.8, 38.7, 32.2, 25.2, 24.7. HRMS (ESI-TOF) *m/z*: [M+H]<sup>+</sup> Calcd. for C<sub>19</sub>H<sub>22</sub>N<sub>3</sub>OS<sub>2</sub>: 372.1199; found 372.1200.

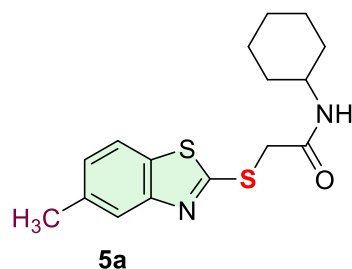

***N*-cyclohexyl-2-((6-methylbenzo[*d*]thiazol-2-yl)thio)acetamide (5a):** The compound was purified by silica gel column chromatography using ethyl acetate/*n*-hexane (45 %) as a mixed eluent to give **5a** as white solid, in 89 % yield. <sup>1</sup>H NMR (DMSO-*d*<sub>6</sub>, 500 MHz) δ 8.21 (d, *J* = 7.5 Hz, 1H), 7.81 (s, 1H), 7.70 (d, *J* = 8.5 Hz, 1H), 7.29 (d, *J* = 8.5 Hz, 1H), 4.09 (s, 2H), 3.54 (m, 1H), 2.41 (s, 1H), 1.74-1.72 (m, 2H), 1.69-1.65 (m, 2H), 1.55-1.52 (m, 1H), 1.30-1.13 (m, 5H); <sup>13</sup>C {<sup>1</sup>H} NMR (DMSO-*d*<sub>6</sub>, 125 MHz) δ 165.7, 165.4, 151.2, 135.3, 134.6, 128.2, 121.9, 121.0, 48.4, 37.3, 32.6, 25.6, 24.8, 21.4. HRMS (ESI-TOF) *m/z*: [M + H]<sup>+</sup> Calcd. for C<sub>16</sub>H<sub>21</sub>N<sub>2</sub>OS<sub>2</sub>: 321.1095; found: 321.1089.

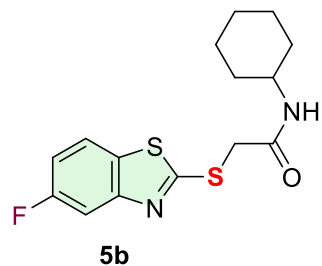

***N*-cyclohexyl-2-((6-fluorobenzo[*d*]thiazol-2-yl)thio)acetamide (5b):** The compound was purified by silica gel column chromatography using ethyl acetate/*n*-hexane (40 %) as a mixed eluent to give **5b** as white solid, in 83 % yield. White solid, yield 83%. <sup>1</sup>H NMR (DMSO-*d*<sub>6</sub>, 500 MHz) δ 8.21 (d, *J* = 8 Hz, 1H), 7.97 (dd, *J* = 9 Hz, 3 Hz, 1H), 7.83 (q, *J* = 5 Hz, 1H), 7.34 (td, *J* = 9 Hz, 2.5 Hz, 1H), 4.11 (s, 2H), 3.57-3.51 (m, 1H), 1.75-1.72 (m, 2H), 1.69-1.65 (m, 2H), 1.55-1.53 (m, 1H), 1.27-1.13 (m, 5H); <sup>13</sup>C {<sup>1</sup>H} NMR (DMSO-*d*<sub>6</sub>, 125 MHz) δ 166.6, 149.9, 136.5 (d, *J*<sub>F-C</sub> = 3.12 Hz), 122.5 (d, *J*<sub>F-C</sub> = 9.6 Hz), 115.0 (d, *J*<sub>F-C</sub> = 24.25 Hz), 109.1, 108.9, 48.5, 37.4, 32.7, 25.6, 24.8; <sup>19</sup>F NMR (DMSO-*d*<sub>6</sub>, 471 MHz) δ -117.18 to -117.23 (m, 1F). HRMS (ESI TOF) *m/z*: [M + H]<sup>+</sup> Calcd. for C<sub>15</sub>H<sub>18</sub>FN<sub>2</sub>OS<sub>2</sub>: 325.0840; found: 325.0845.

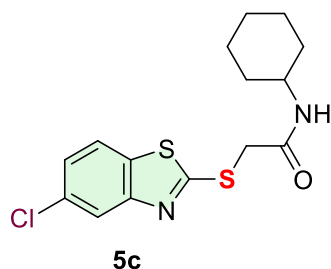

**2-((6-Chlorobenzod[thiazol-2-yl)thio)-N-cyclohexylacetamide (5c):** The compound was purified by silica gel column chromatography using ethyl acetate/*n*-hexane (35 %) as a mixed eluent to give **5c** as white solid, in 84 % yield. <sup>1</sup>H NMR (DMSO-*d*<sub>6</sub>, 500 MHz) δ 8.22 (d, *J* = 8 Hz, 1H), 8.19 (d, *J* = 2.5 Hz, 1H), 7.80 (d, *J* = 9 Hz, 1H), 7.50 (dd, *J* = 8.75 Hz, 2.5 Hz, 1H), 4.12, (s, 2H), 3.93-3.52 (m, 1H), 1.75-1.72 (m, 2H), 1.69-1.66 (m, 2H), 1.55-1.53 (m, 1H), 1.28-1.14 (m, 5H); <sup>13</sup>C {<sup>1</sup>H} NMR (DMSO-*d*<sub>6</sub>, 125 MHz) δ 168.2, 165.5, 151.9, 136.8, 129.3, 127.3, 122.5, 122.0, 48.3, 37.4, 32.6, 25.6, 24.8. HRMS (ESI-TOF) *m/z*: [M + H]<sup>+</sup> Calcd. for C<sub>15</sub>H<sub>18</sub>ClN<sub>2</sub>OS<sub>2</sub>: 341.0544; found: 341.0545.

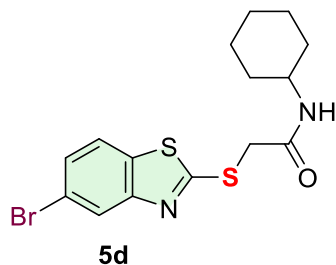

**2-((6-Bromobenzod[thiazol-2-yl)thio)-N-cyclohexylacetamide (5d):** The compound was purified by silica gel column chromatography using ethyl acetate/*n*-hexane (35 %) as a mixed eluent to give **5d** as white solid, in 86 % yield. <sup>1</sup>H NMR (DMSO-*d*<sub>6</sub>, 500 MHz) δ 8.32 (d, *J* = 2 Hz, 1H), 8.23 (d, *J* = 8 Hz, 1H), 7.75 (d, *J* = 8.5 Hz, 1H), 7.62 (dd, *J* = 6.5 Hz, 2 Hz, 1H), 4.11 (s, 2H), 3.57-3.51 (m, 1H), 1.75-1.72 (m, 2H), 1.69- 1.65 (m, 2H), 1.55-1.53 (m, 1H), 1.27-1.14 (m, 5H); <sup>13</sup>C {<sup>1</sup>H} NMR (DMSO-*d*<sub>6</sub>, 125 MHz) δ = 168.3, 165.5, 152.1, 137.2, 130.0, 124.9, 122.9, 117.3, 48.5, 37.3, 32.6, 25.6, 24.8. HRMS (ESI-TOF) *m/z*: [M + H]<sup>+</sup> Calcd. for C<sub>15</sub>H<sub>17</sub>BrN<sub>2</sub>OS<sub>2</sub>: 385.0039; found: 385.0041.

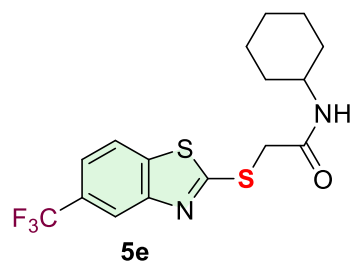

***N*-cyclohexyl-2-((6-(trifluoromethyl)benzo[*d*]thiazol-2-yl)thio)acetamide (5e)** The compound was purified by silica gel column chromatography using ethyl acetate/*n*-hexane (30 %) as a mixed eluent to give **5e** as white solid, in 82 % yield. <sup>1</sup>H NMR (DMSO-*d*<sub>6</sub>, 500 MHz) δ 8.56 (s, 1H), 8.25 (d, *J* = 7.5 Hz, 1H), 7.97 (d, *J* = 8.5 Hz, 1H), 7.78 (dd, *J* = 1.5 Hz, 8.5 Hz, 1H), 4.16 (s, 2H), 3.56-3.54 (m, 1H), 1.76-1.73 (m, 2H), 1.69-1.66 (m, 2H), 1.55-1.52 (m, 1H), 1.29-1.12 (m, 5H); <sup>13</sup>C {<sup>1</sup>H} NMR (DMSO-*d*<sub>6</sub>, 125 MHz) δ = 171.8, 165.4, 155.3, 135.8, 125.9, 125.1, 124.9, 123.8 (q, *J*<sub>F-C</sub> = 15 Hz), 121.9, 120.4 (q, *J*<sub>F-C</sub> = 14.5 Hz), 48.5, 37.4, 32.6, 25.6, 24.8; <sup>19</sup>F NMR (DMSO-*d*<sub>6</sub>, 471 MHz) δ = -79.71 (s, 3F). HRMS (ESI TOF) *m/z*: [M + H]<sup>+</sup> Calcd. for C<sub>16</sub>H<sub>18</sub>F<sub>3</sub>N<sub>2</sub>OS<sub>2</sub>: 375.0813; found: 375.0810.

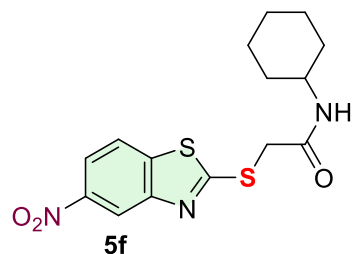

***N*-cyclohexyl-2-((6-nitrobenzo[*d*]thiazol-2-yl)thio)acetamide (5f):** The compound was purified by silica gel column chromatography using ethyl acetate/*n*-hexane (50 %) as a mixed eluent to give **5f** as white solid, in 81 % yield. <sup>1</sup>H NMR (DMSO-*d*<sub>6</sub>, 500 MHz) δ 9.23 (d, *J* = 2 Hz, 1H), 8.32-8.27 (m, 2H), 7.97 (d, *J* = 8.5 Hz, 1H), 4.20 (s, 2H), 3.58-3.53 (m, 1H), 1.76-1.74 (m, 2H), 1.70-1.67 (m, 2H), 1.60-1.54 (m, 1H), 1.28-1.4 (m, 5); <sup>13</sup>C {<sup>1</sup>H} NMR (DMSO-*d*<sub>6</sub>, 125 MHz) δ 175.0, 165.3, 156.9, 144.0, 136.0, 122.5, 121.5, 119.4, 48.6, 37.6, 32.7, 25.6, 24.9. HRMS (ESI-TOF) *m/z*: [M + H]<sup>+</sup> Calcd. for C<sub>15</sub>H<sub>17</sub>N<sub>3</sub>O<sub>3</sub>S<sub>2</sub>: 352.0790; found: 352.0783

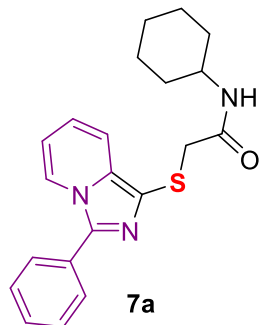

***N*-cyclohexyl-2-((3-phenylimidazo[1,5-*a*]pyridin-1-yl)thio)acetamide (**7a**):**

The compound was purified by silica gel column chromatography using ethyl acetate/*n*-hexane (40 %) as a mixed eluent to give **7a** as buff coloured solid, in 83 % yield. <sup>1</sup>H NMR (CDCl<sub>3</sub>, 600 MHz) δ (ppm) 8.23 (d, *J* = 7 Hz, 1H), 7.93-7.92 (m, 1H), 7.77-7.75 (m, 2H), 7.61 (d, *J* = 9.5 Hz, 1H), 7.54-7.51 (m, 2H), 7.45 (dt, *J* = 6.5 Hz, 1 Hz, 1H), 6.87-6.84 (m, 2H), 6.65-6.62 (m, 1H), 3.76-3.69 (m, 1H), 3.48 (m, 2H), 1.81-1.77 (m, 2H), 1.69-1.61 (m, 2H), 1.54-1.51 (m, 1H), 1.29-1.25 (m, 3H), 1.22-1.18 (m, 2H); <sup>13</sup>C {<sup>1</sup>H} NMR (CDCl<sub>3</sub>, 125 MHz) δ (ppm) 168.7, 138.5, 133.2, 129.4, 129.2, 129.0, 128.0, 122.0, 121.9, 120.7, 118.3, 114.0, 65.8, 48.4, 40.2, 32.6, 25.6, 24.6, 15.3. HRMS (ESI-TOF) *m/z*: [M+H]<sup>+</sup> Calcd. for C<sub>21</sub>H<sub>24</sub>N<sub>3</sub>OS: 366.1635; found 366.1633.

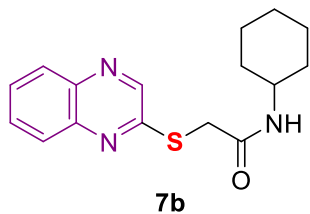

***N*-cyclohexyl-2-(quinoxalin-2-ylthio)acetamide (**7b**):**

The compound was purified by silica gel column chromatography using ethyl acetate/*n*-hexane (50 %) as a mixed eluent to give **7b** as buff coloured solid, in 83 % yield. <sup>1</sup>H NMR (CDCl<sub>3</sub>, 600 MHz) δ (ppm) 8.86 (s, 1H), 8.07 (dd, *J* = 8.8 Hz, 1.2 Hz, 1H), 7.91 (dd, *J* = 8.4 Hz, 1.2 Hz, 1H), 7.77-7.74 (m, 1H), 7.70-7.68 (m, 1H), 7.17 (d, *J* = 6.6 Hz, 1H), 3.93 (s, 2H), 3.76-3.73 (m, 1H), 1.84-1.82 (m, 2H), 1.59-1.56 (m, 2H), 1.54-1.51 (m, 1H), 1.33-1.26 (m, 2H), 1.11-1.02 (m, 3H); <sup>13</sup>C {<sup>1</sup>H} NMR (CDCl<sub>3</sub>, 150 MHz) δ (ppm) 167.6, 154.8, 144.4, 142.0, 140.2, 130.8, 129.5, 128.8, 127.2, 48.4, 33.3, 32.7, 25.4, 24.5. HRMS (ESI-TOF) *m/z*: [M+H]<sup>+</sup> Calcd. for C<sub>16</sub>H<sub>20</sub>N<sub>3</sub>OS: 302.1322; found 302.1318.

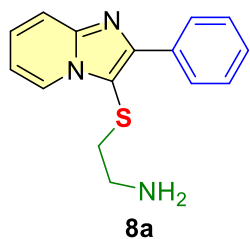

**2-((2-phenylimidazo[1,2-*a*]pyridin-3-yl)thio)ethan-1-amine (8a):**

The compound was purified by silica gel column chromatography using ethyl acetate/*n*-hexane (75 %) as a mixed eluent to give **8a** as a solid in 80 % yield; melting point: 211-214°C.  $^{13}\text{C}\{^1\text{H}\}$  NMR ( $\text{CDCl}_3$ , 600 MHz)  $\delta$  (ppm) 8.38 (d,  $J=6.6$  Hz, 1H), 8.2-8.19 (m, 2H), 7.77 (d,  $J=9$  Hz, 1H), 7.54-7.51 (m, 2H), 7.49-7.46 (m, 2H), 7.1 (td,  $J=7.2$  Hz, 1.2 Hz, 1H), 2.17 (s, 1H), 1.25 (s, 4H);  $^{13}\text{C}$  NMR ( $\text{CDCl}_3$ , 150 MHz)  $\delta$  (ppm) 153.4, 146.8, 131.2, 130.1, 129.0, 128.7, 127.3, 125.6, 118.2, 114.7, 112.8, 30.9, 29.7. HRMS (ESI-TOF)  $m/z$ :  $[\text{M}+\text{H}]^+$  Calcd. for  $\text{C}_{15}\text{H}_{16}\text{N}_3\text{S}$ : 270.1060; found 270.1045.

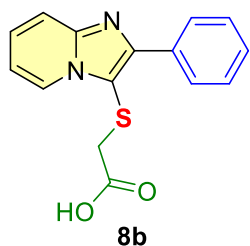

**2-((2-Phenylimidazo[1,2-*a*]pyridin-3-yl)thio)acetic acid (8b):**

The compound was purified by silica gel column chromatography using ethyl acetate/*n*-hexane (75 %) as a mixed eluent to give **8b** as a yellow solid in 75 % yield; melting point: 195-96°C.  $^1\text{H}$  NMR ( $\text{DMSO-}d_6$ , 600 MHz)  $\delta$  (ppm) 12.71 (s, 1H), 8.68 (d,  $J=7.2$  Hz, 1H), 8.27 (d,  $J=8.4$  Hz, 2H), 7.68 (d,  $J=9$  Hz, 1H), 7.49 (t,  $J=7.8$  Hz, 2H), 7.46-7.39 (m, 2H), 7.11 (td,  $J=6.6$  Hz, 0.6 Hz, 1H), 3.53 (s, 2H);  $^{13}\text{C}\{^1\text{H}\}$  NMR ( $\text{DMSO-}d_6$ , 150 MHz)  $\delta$  (ppm) 170.8, 149.0, 146.4, 134.0, 128.8, 128.7, 128.3, 127.4, 125.7, 117.4, 113.5, 108.6, 37.3. HRMS (ESI-TOF)  $m/z$ :  $[\text{M}+\text{H}]^+$  Calcd. for  $\text{C}_{15}\text{H}_{13}\text{N}_2\text{O}_2\text{S}$ : 285.2010; found 285.2813.

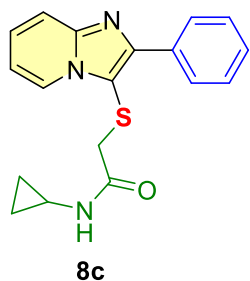

***N*-cyclopropyl-2-((2-phenylimidazo[1,2-*a*]pyridin-3-yl)thio)acetamide (**8c**):**

The compound was purified by silica gel column chromatography using ethyl acetate/*n*-hexane (35 %) as a mixed eluent to give **8c** as white solid, in 86 % yield. <sup>1</sup>H NMR (CDCl<sub>3</sub>, 600 MHz) δ (ppm) 9.15 (d, *J* = 7.2 Hz, 1H), 8.83-8.82 (m, 2H), 8.32 (d, *J* = 9 Hz, 1H), 8.18 (t, *J* = 7.2 Hz, 2H), 8.11 (d, *J* = 7.8 Hz, 1H), 8.02-7.99 (m, 1H), 6.78 (s, 1H), 3.89 (s, 2H), 2.97-2.93 (m, 1H), 1.13-1.10 (m, 2H), 0.57-0.55 (m, 2H); <sup>13</sup>C {<sup>1</sup>H} NMR (CDCl<sub>3</sub>, 150 MHz) δ (ppm) 167.8, 149.2, 145.8, 132.4, 127.8, 127.6, 125.7, 123.4, 116.8, 112.2, 107.0, 37.25, 21.6, 4.9. HRMS (ESI-TOF) *m/z*: [M+H]<sup>+</sup> Calcd. for C<sub>18</sub>H<sub>18</sub>N<sub>3</sub>OS: 324.1166; found 324.1175.

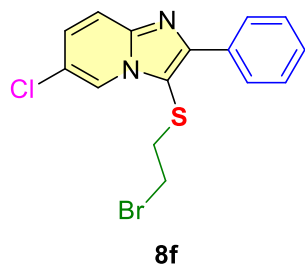

**3-((2-Bromoethyl)thio)-6-chloro-2-phenylimidazo[1,2-*a*]pyridine (**8f**):**

The compound was purified by silica gel column chromatography using ethyl acetate/*n*-hexane (30 %) as a mixed eluent to give **8f** as white solid, in 50 % yield. <sup>1</sup>H NMR (CDCl<sub>3</sub>, 500 MHz) δ (ppm) 7.83 (dd, *J* = 2 Hz, 0.5 Hz, 1H), 8.30-8.28 (m, 2H), 7.65 (dd, *J* = 2 Hz, 9.5 Hz, 0.5 Hz, 1H), 7.52-7.49 (m, 2H), 7.44 (tt, *J* = 7 Hz, 1.5 Hz, 1H), 7.32 (dd, *J* = 9.5 Hz, 2 Hz, 1H), 3.28-3.25 (m, 2H), 3.08-3.05 (m, 2H); <sup>13</sup>C {<sup>1</sup>H} NMR (CDCl<sub>3</sub>, 125 MHz) δ (ppm) 151.1, 145.1, 133.0, 128.9, 128.6, 128.4, 127.8, 122.3, 121.7, 118.2, 37.7, 29.8. HRMS (ESI-TOF) *m/z*: [M+H]<sup>+</sup> Calcd. for C<sub>15</sub>H<sub>13</sub>BrClN<sub>2</sub>S: 366.9666; found 366.9670.

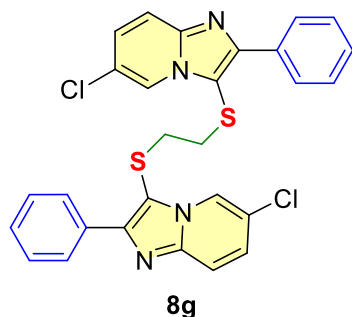

**1,2-Bis((6-chloro-2-phenylimidazo[1,2-*a*]pyridin-3-yl)thio)ethane (8g):**

The compound was purified by silica gel column chromatography using ethyl acetate/*n*-hexane (30 %) as a mixed eluent to give **8g** as white solid, in 20 % yield.  $^1\text{H}$  NMR ( $\text{CDCl}_3$ , 500 MHz)  $\delta$  (ppm) 8.33 (dd,  $J = 2$  Hz, 1 Hz, 2H), 8.13-8.11 (m, 4H), 7.59 (dd,  $J = 9$  Hz, 0.5 Hz, 2H), 7.47-7.44 (m, 4H), 7.43-7.39 (m, 2H), 7.30 (d,  $J = 2$  Hz, 1H), 7.28 (s, 1H), 2.53 (s, 4H);  $^{13}\text{C}\{^1\text{H}\}$  NMR ( $\text{CDCl}_3$ , 125 MHz)  $\delta$  (ppm) 144.9, 132.9, 128.7, 128.5, 128.3, 127.7, 122.1, 121.5, 118.1, 109.2, 34.9. HRMS (ESI-TOF)  $m/z$ :  $[\text{M}+\text{H}]^+$  Calcd. for  $\text{C}_{28}\text{H}_{21}\text{Cl}_2\text{N}_4\text{S}_2$ : 547.0580; found 547.0582.

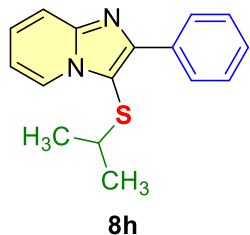

**3-(Isopropylthio)-2-phenylimidazo[1,2-*a*]pyridine (8h):** The compound was purified by silica gel column chromatography using ethyl acetate/*n*-hexane (10 %) as a mixed eluent to give **8h** as white semi-solid, in 67 % yield.  $^1\text{H}$  NMR ( $\text{CDCl}_3$ , 600 MHz)  $\delta$  (ppm) 7.54 (d,  $J = 7.54$  Hz, 2H), 7.46 (d,  $J = 8.4$  Hz, 2H), 7.15 (s, 1H), 6.92 (d,  $J = 8.4$  Hz, 4H), 5.74 (d,  $J = 13.2$  Hz, 2H), 3.84 (s, 6H);  $^{13}\text{C}\{^1\text{H}\}$  NMR ( $\text{CDCl}_3$ , 125 MHz)  $\delta$  (ppm) 160.9, 159.1, 142.6, 134.4, 128.6, 128.0, 127.4, 126.8, 122.9, 117.3, 114.3, 114.2, 110.1, 55.4, 55.4. HRMS (ESI-TOF)  $m/z$ :  $[\text{M}+\text{H}]^+$  Calcd. for  $\text{C}_{16}\text{H}_{17}\text{N}_2\text{S}$ : 269.1107; found 269.1108.

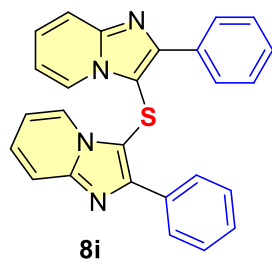

**Bis(2-phenylimidazo[1,2-*a*]pyridin-3-yl)sulfane (8i):**

The compound was purified by silica gel column chromatography using ethyl acetate/*n*-hexane (30%) as a mixed eluent to give **8i** as a pale-yellow solid in 20 % yield. <sup>1</sup>H NMR (CDCl<sub>3</sub>, 600 MHz) δ (ppm) 8.10 (d, *J*= 7.8 Hz, 4H), 7.51 (t, *J*= 7.8 Hz, 4H), 7.56-7.55 (m, 4H), 7.49 (d, *J*= 9 Hz, 2H), 7.09 (t, *J*= 7.8 Hz, 2H), 6.34 (t, *J*= 6.6 Hz, 2H); <sup>13</sup>C{<sup>1</sup>H} NMR (CDCl<sub>3</sub>, 150 MHz) δ (ppm) 150.9, 146.6, 133.8, 129.6, 128.9, 128.6, 126.3, 125.3, 117.4, 112.6, 107.5. HRMS (ESI-TOF) *m/z*: [M+H]<sup>+</sup> Calcd. for C<sub>26</sub>H<sub>19</sub>N<sub>4</sub>S: 419.1325; found 419.1321.

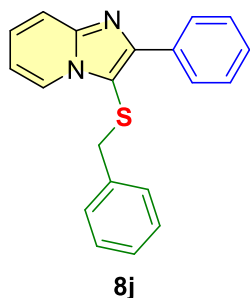

**3-(Benzylthio)-2-phenylimidazo[1,2-*a*]pyridine (8j):**

The compound was purified by silica gel column chromatography using ethyl acetate/*n*-hexane (12 %) as a mixed eluent to give **8j** as white solid, in 89 % yield. <sup>1</sup>H NMR (CDCl<sub>3</sub>, 600 MHz) δ (ppm) 8.14 (d, *J*= 7.8 Hz, 2H), 7.94 (d, *J*= 2 Hz, 2H), 7.47 (d, *J*=9 Hz, 1H), 7.34 (t, *J*= 7.8 Hz, 2H), 7.26 (t, *J*= 7.2 Hz, 1H), 7.04 (t, *J*= 7.2 Hz, 1H), 6.97-6.91 (m, 3H), 6.79 (d, *J*= 7.2 Hz, 2H), 6.52 (t, *J*= 6.6 Hz, 1H), 3.68 (s, 2H); <sup>13</sup>C{<sup>1</sup>H} NMR (CDCl<sub>3</sub>, 150 MHz) δ (ppm) 150.1, 146.4, 137.1, 133.8, 128.7, 128.5, 128.3, 128.3, 127.3, 126.0, 124.2, 117.2, 112.3, 109.4, 40.6. HRMS (ESI-TOF) *m/z*: [M+H]<sup>+</sup> Calcd. for C<sub>20</sub>H<sub>17</sub>N<sub>2</sub>S: 317.1107; found 317.1133.

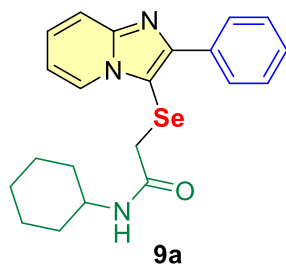

***N*-cyclohexyl-2-((2-phenylimidazo[1,2-*a*]pyridin-3-yl)selanyl)acetamide (**9a**):**

The compound was purified by silica gel column chromatography using ethyl acetate/*n*-hexane (30 %) as a mixed eluent to give **9a** as white solid, in 89 % yield. <sup>1</sup>H NMR (CDCl<sub>3</sub>, 600 MHz) δ (ppm) 8.55 (d, *J* = 6.6 Hz, 1H), 8.17 (d, *J* = 7.8 Hz, 2H), 7.66 (d, *J* = 9 Hz, 1H), 7.54 (t, *J* = 7.2 Hz, 2H), 7.40 (t, *J* = 7.2 Hz, 1H), 7.32-7.28 (m, 1H), 6.93 (t, *J* = 6.6 Hz, 1H), 3.40-3.34 (m, 1H), 3.18 (s, 2H), 1.52-1.50 (m, 3H), 1.45-1.43 (m, 2H), 1.19-1.11 (m, 2H), 1.00-0.93 (m, 1H), 0.64-0.58 (m, 2H); <sup>13</sup>C {<sup>1</sup>H} NMR (CDCl<sub>3</sub>, 150 MHz) δ (ppm) 167.6, 150.4, 147.5, 133.6, 128.8, 128.6, 128.5, 126.6, 125.9, 117.3, 113.1, 103.2, 77.3, 77.1, 76.9, 48.8, 32.2, 31.1, 25.2, 24.6. HRMS (ESI-TOF) *m/z*: [M+H]<sup>+</sup> Calcd. for C<sub>21</sub>H<sub>24</sub>N<sub>3</sub>OS: 414.1080; found 414.1084.

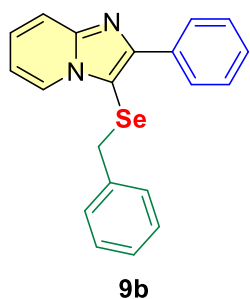

**3-(Benzylselanyl)-2-phenylimidazo[1,2-*a*]pyridine (**9b**):**

The compound was purified by silica gel column chromatography using ethyl acetate/*n*-hexane (12 %) as a mixed eluent to give **9b** as white solid, in 86 % yield. <sup>1</sup>H NMR (CDCl<sub>3</sub>, 600 MHz) δ (ppm) 8.15 (t, *J* = 8.4 Hz, 3H), 7.63 (d, *J* = 8.4 Hz, 1H), 7.45 (t, *J* = 7.2 Hz, 2H), 7.41-7.38 (m, 2H), 7.23-7.20 (m, 1H), 7.07-7.04 (m, 2H), 6.90 (d, *J* = 7.2 Hz, 2H), 6.70 (t, *J* = 6.6 Hz, 1H), 3.88 (s, 2H); <sup>13</sup>C {<sup>1</sup>H} NMR (CDCl<sub>3</sub>, 150 MHz) δ (ppm) 150.9, 147.2, 137.9, 134.0, 128.7, 128.5, 128.4, 128.2, 128.9, 127.1, 127.0, 126.0, 125.3, 117.1, 112.3, 33.1. HRMS (ESI-TOF) *m/z*: [M+H]<sup>+</sup> Calcd. for C<sub>20</sub>H<sub>17</sub>N<sub>2</sub>Se: 365.0552; found 365.0550.

**2-Phenyl-3-((2-phenyl-1,8a-dihydroimidazo[1,2-a]pyridin-3-yl)disulfanyl)imidazo[1,2-a]pyridine (1aa):**

The compound was purified by silica gel column chromatography using ethyl acetate/*n*-hexane (50 %) as a mixed eluent to give **1aa** as a yellow solid. <sup>1</sup>H NMR (CDCl<sub>3</sub>, 600 MHz) δ= 8.12 (d, *J* = 5.4 Hz, 2H), 7.65 (s, 4H), 7.38 (d, *J* = 5.4 Hz, 2H), 7.22 (t, *J* = 7.8 Hz, 2H), 7.16-7.11 (m, 6H), 6.77 (t, *J* = 6.6 Hz, 2H); <sup>13</sup>C {<sup>1</sup>H} NMR (CDCl<sub>3</sub>, 150 MHz) δ = 147.3, 132.0, 128.2, 127.9, 127.7, 127.0, 124.4, 117.6, 113.0. HRMS (ESI-TOF) *m/z*: [M+H]<sup>+</sup> Calcd. for C<sub>27</sub>H<sub>18</sub>N<sub>4</sub>S<sub>2</sub>: 451.1046; found 451.1040.

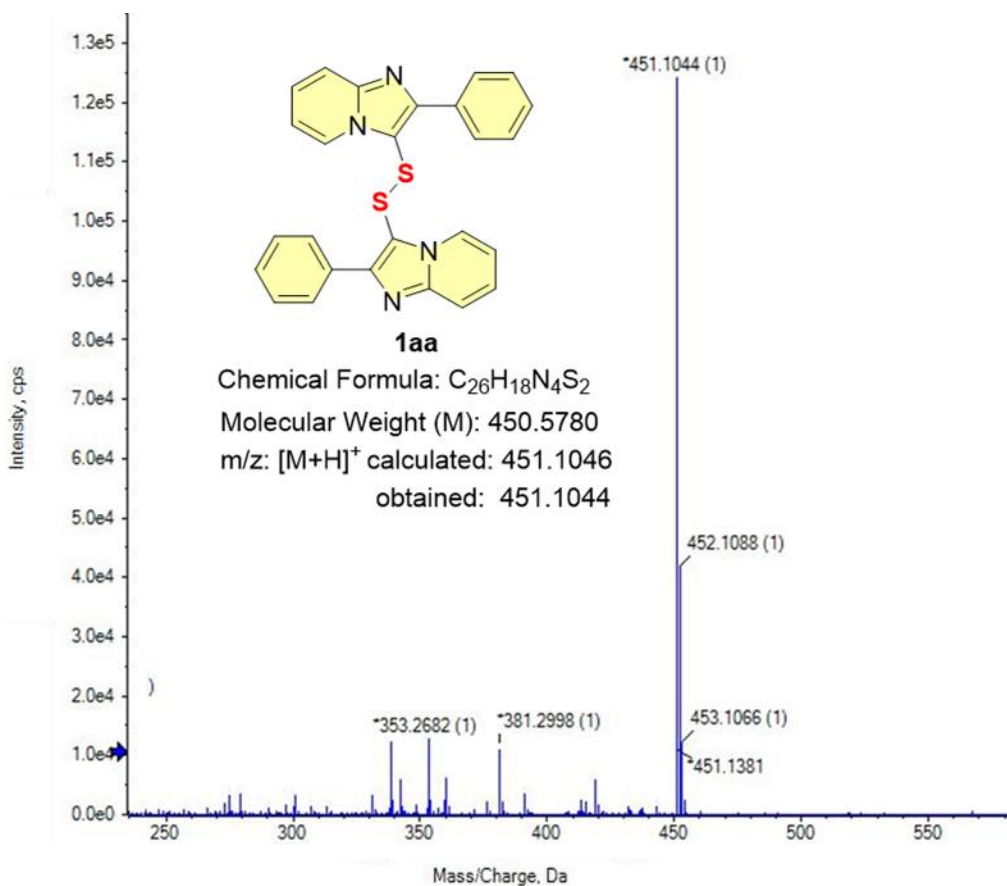

8.507  
8.495  
8.241  
8.228  
7.679  
7.665  
7.531  
7.519  
7.506  
7.429  
7.335  
7.265  
6.987  
6.975  
6.964

5.769

3.392  
3.386  
3.379  
3.373  
3.367  
3.270

1.513  
1.507  
1.498  
1.492  
1.433  
1.416  
1.146  
1.124  
0.943  
0.922  
0.521  
0.502  
0.485  
0.482  
0.000

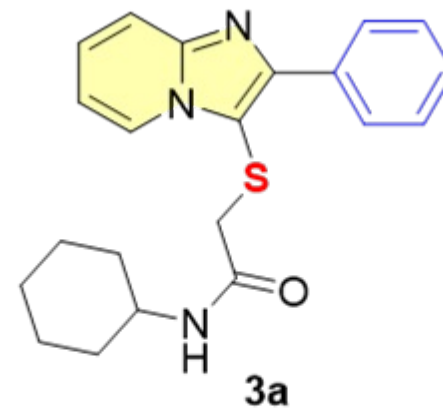

<sup>1</sup>H NMR (CDCl<sub>3</sub>, 600 MHz)

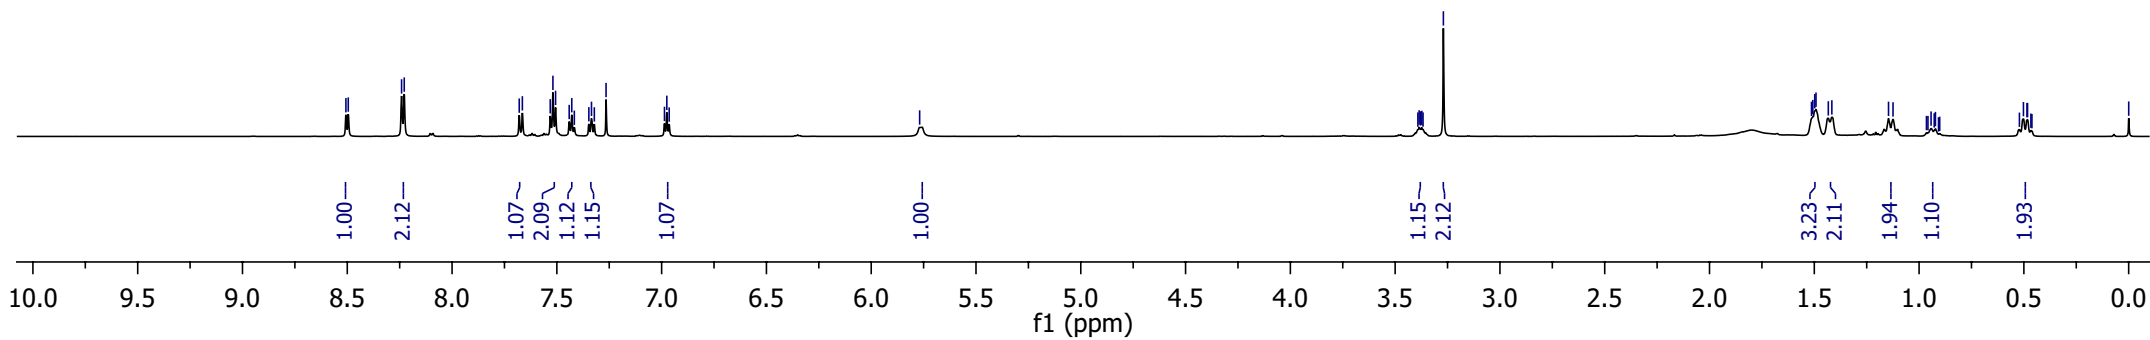

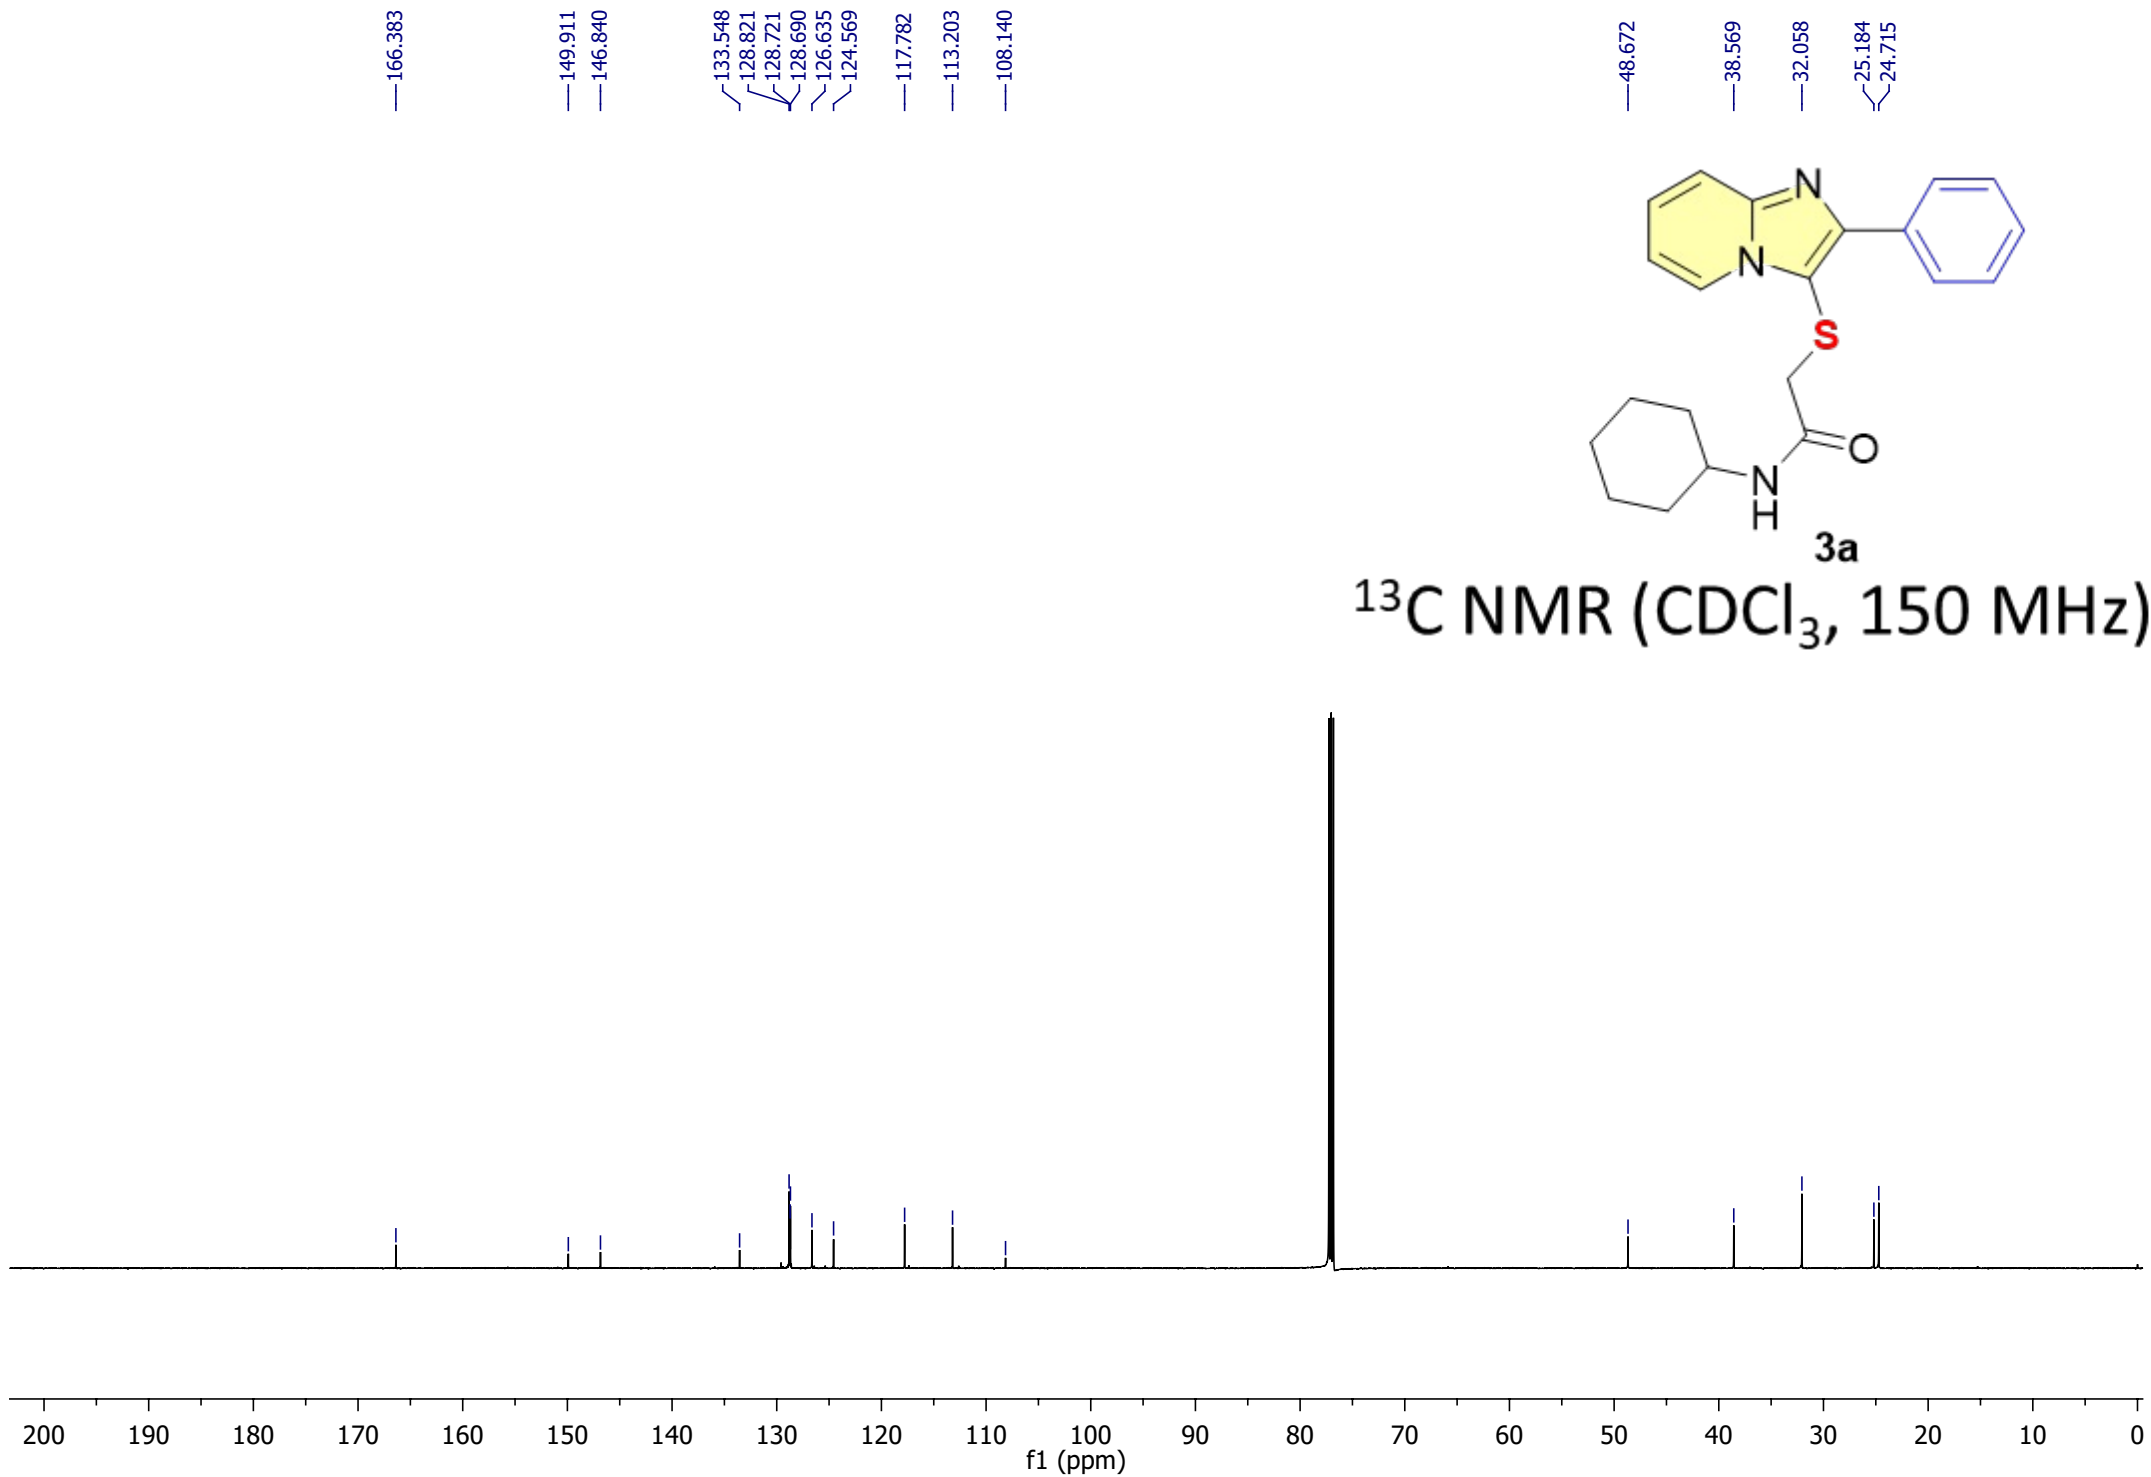

8.350  
8.339  
8.211  
8.199

7.506  
7.493  
7.480  
7.415  
7.400

6.788  
6.777

5.849  
5.837

3.402  
3.389  
3.383  
3.377  
3.370  
3.365  
3.359  
3.352  
3.345  
3.229

2.434

1.514  
1.508  
1.492  
1.436  
1.418

1.145  
1.123  
0.941  
0.920  
0.513  
0.494  
0.475  
0.470

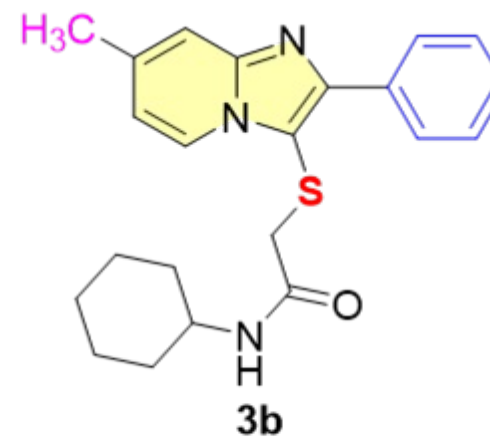

$^1\text{H}$  NMR ( $\text{CDCl}_3$ , 600 MHz)

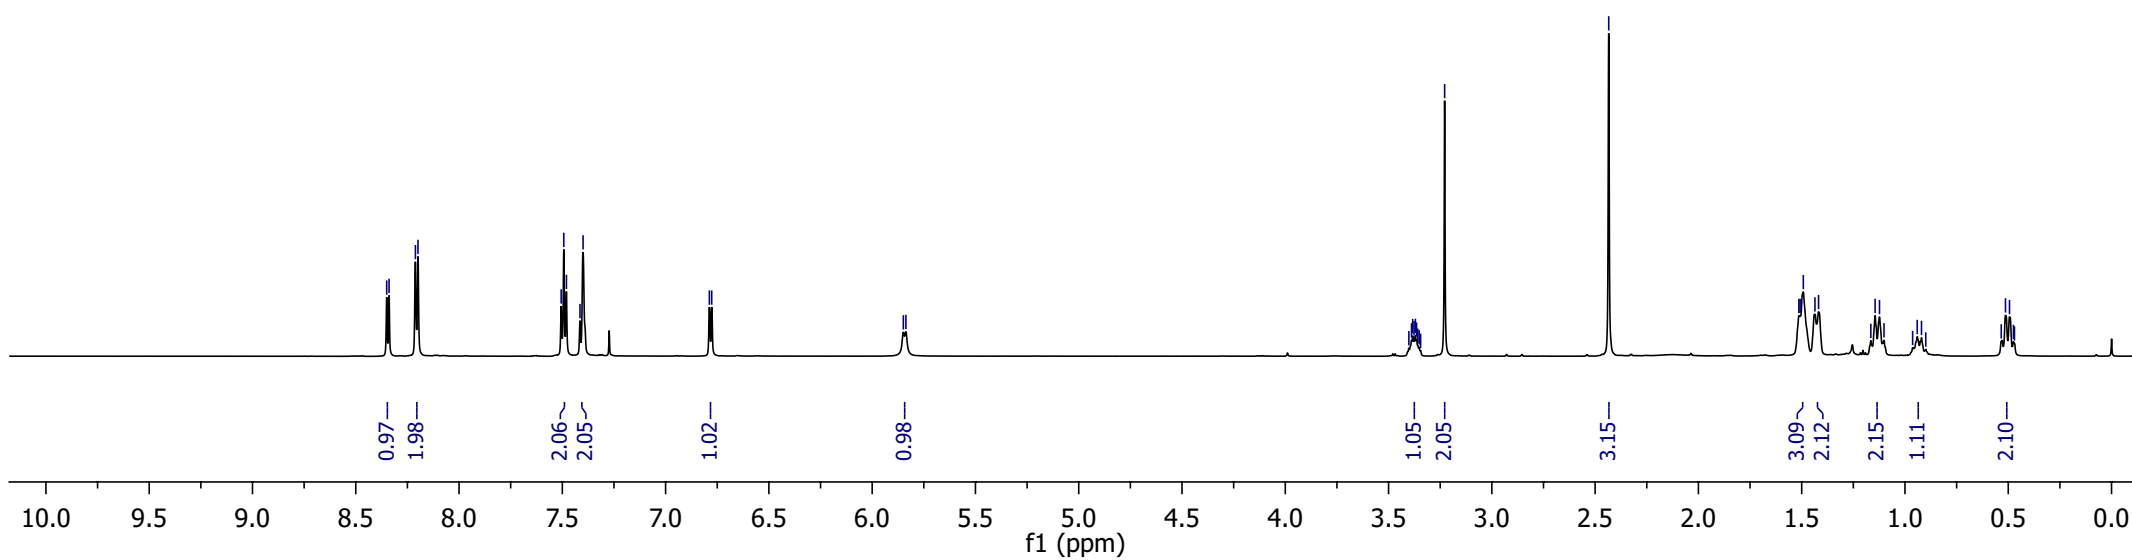

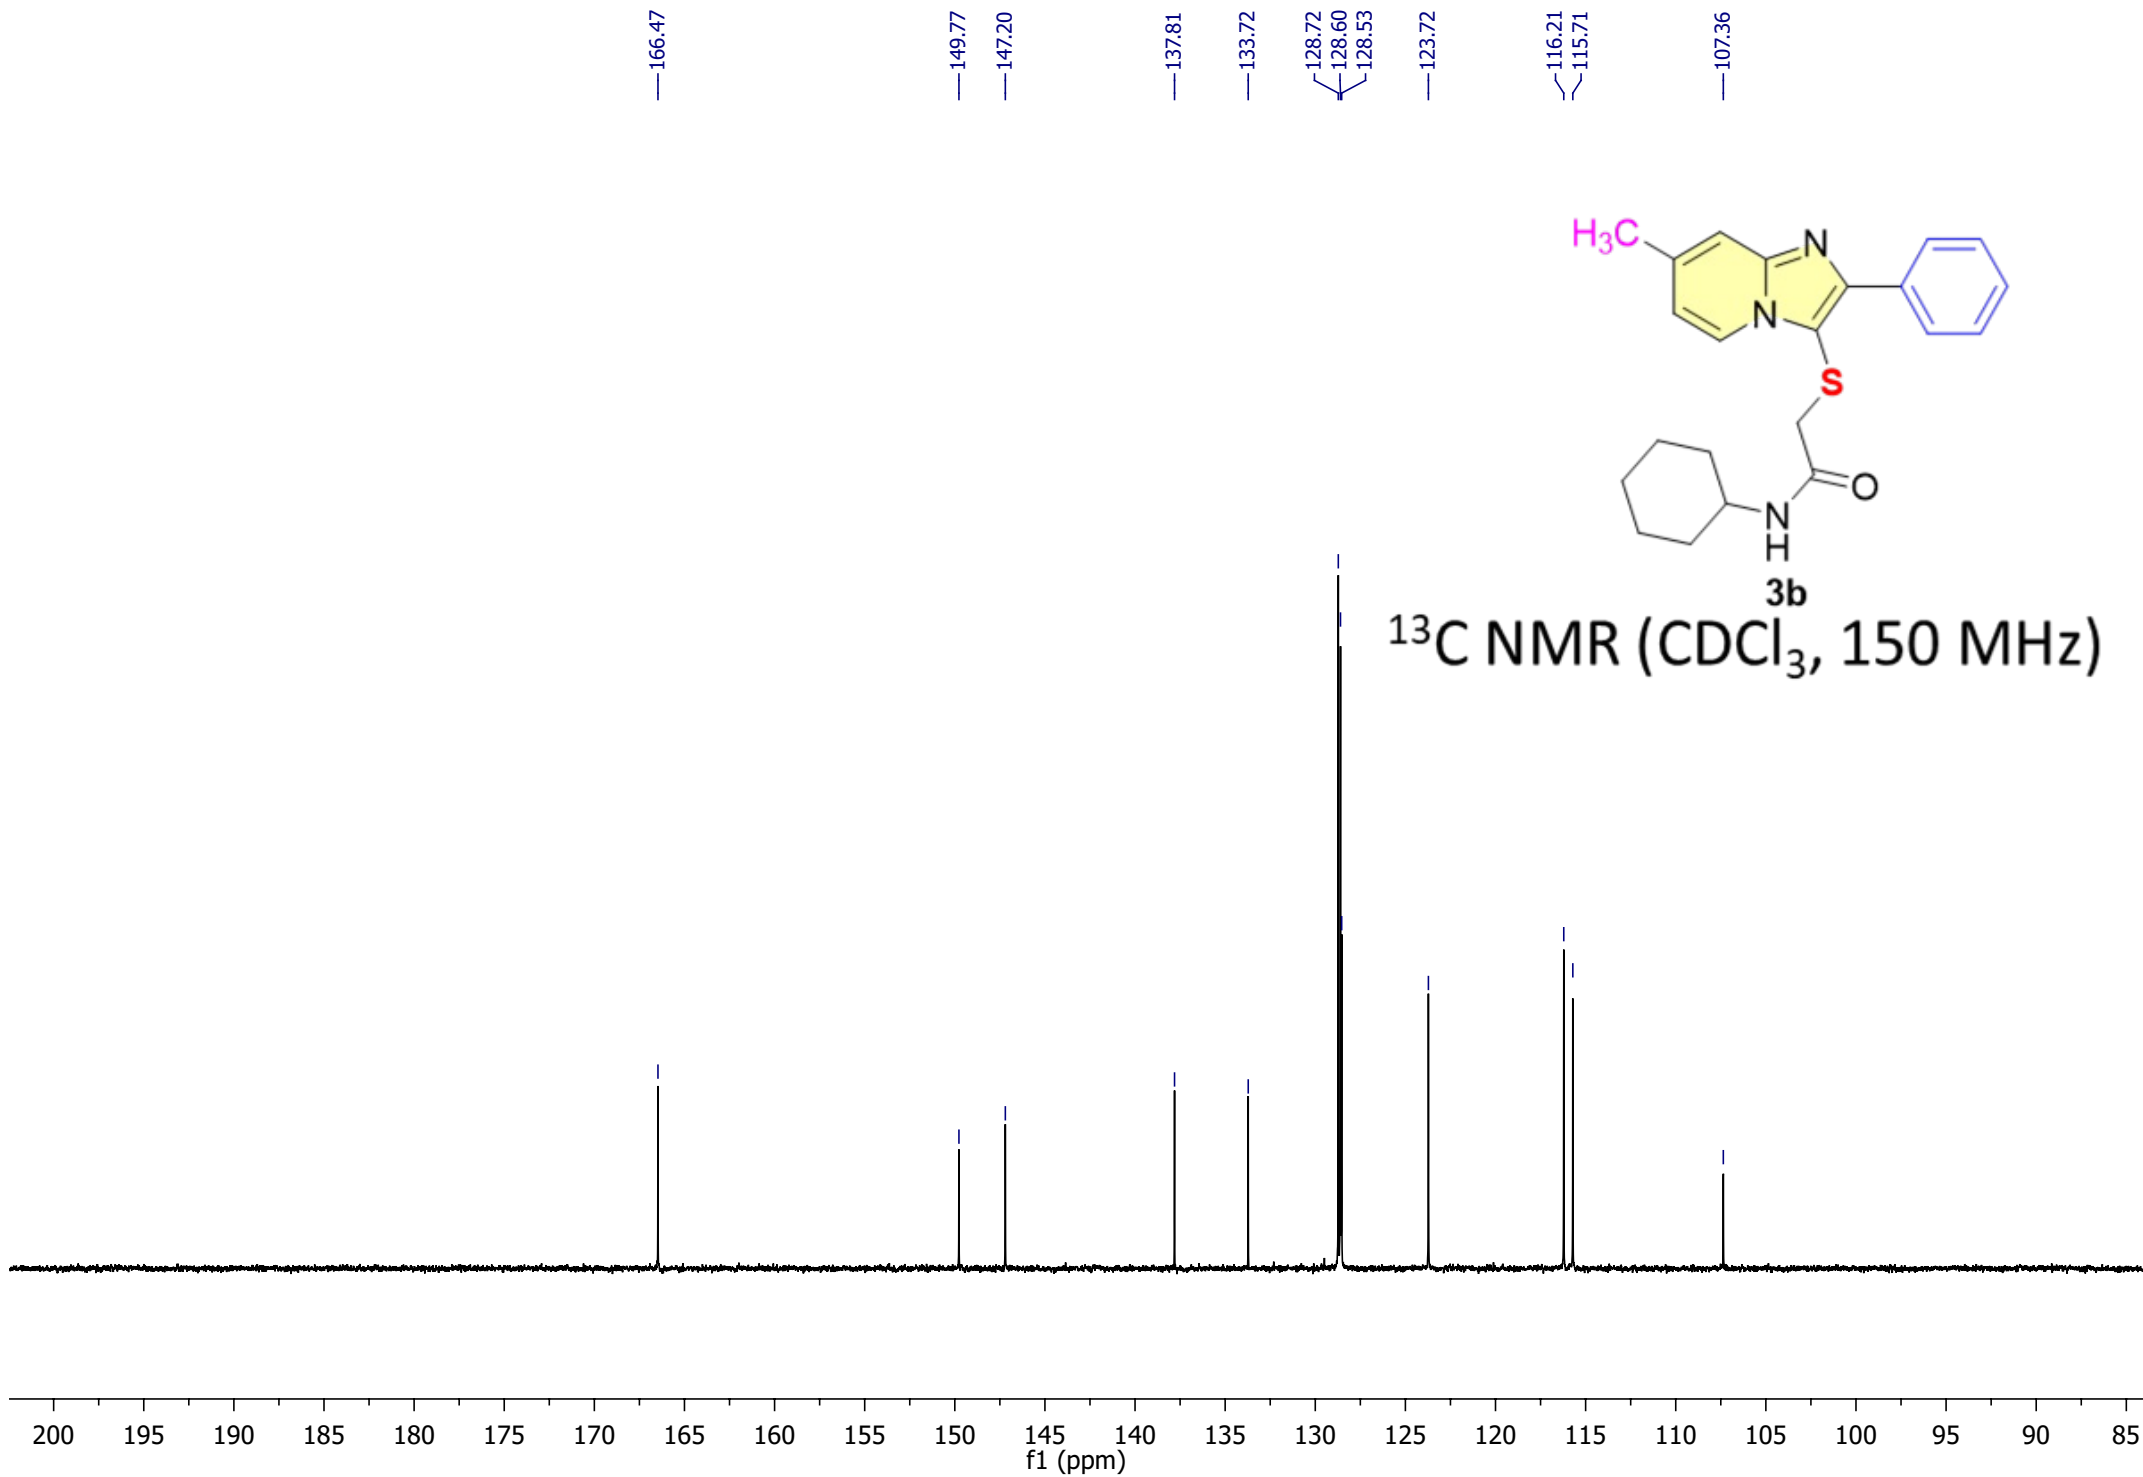

8.203  
8.191  
8.037  
8.033

7.542  
7.526  
7.493  
7.489  
7.106  
7.093  
7.090

5.795  
5.782

3.915  
3.409  
3.402  
3.396  
3.390  
3.384  
3.377  
3.372  
3.366  
3.359  
3.251

1.981  
1.514  
1.507  
1.498  
1.492  
1.429  
1.412  
1.148  
1.127  
0.946  
0.535  
0.519  
0.499  
0.496  
0.480  
0.475

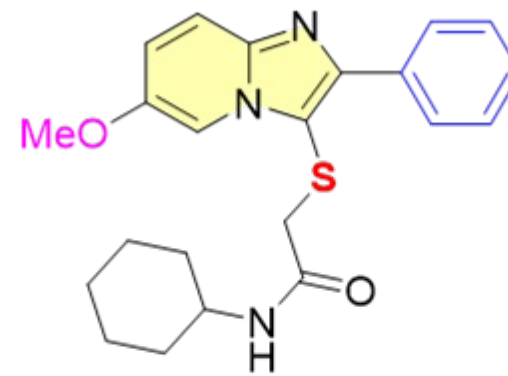

3c

$^1\text{H NMR}$  ( $\text{CDCl}_3$ , 600 MHz)

2.01  
0.98

0.92  
1.93  
0.98

0.91

0.96

3.08

1.05  
2.06

1.02

3.16  
2.08

2.11

1.08

2.06

10.0 9.5 9.0 8.5 8.0 7.5 7.0 6.5 6.0 5.5 5.0 4.5 4.0 3.5 3.0 2.5 2.0 1.5 1.0 0.5 0.0

f1 (ppm)

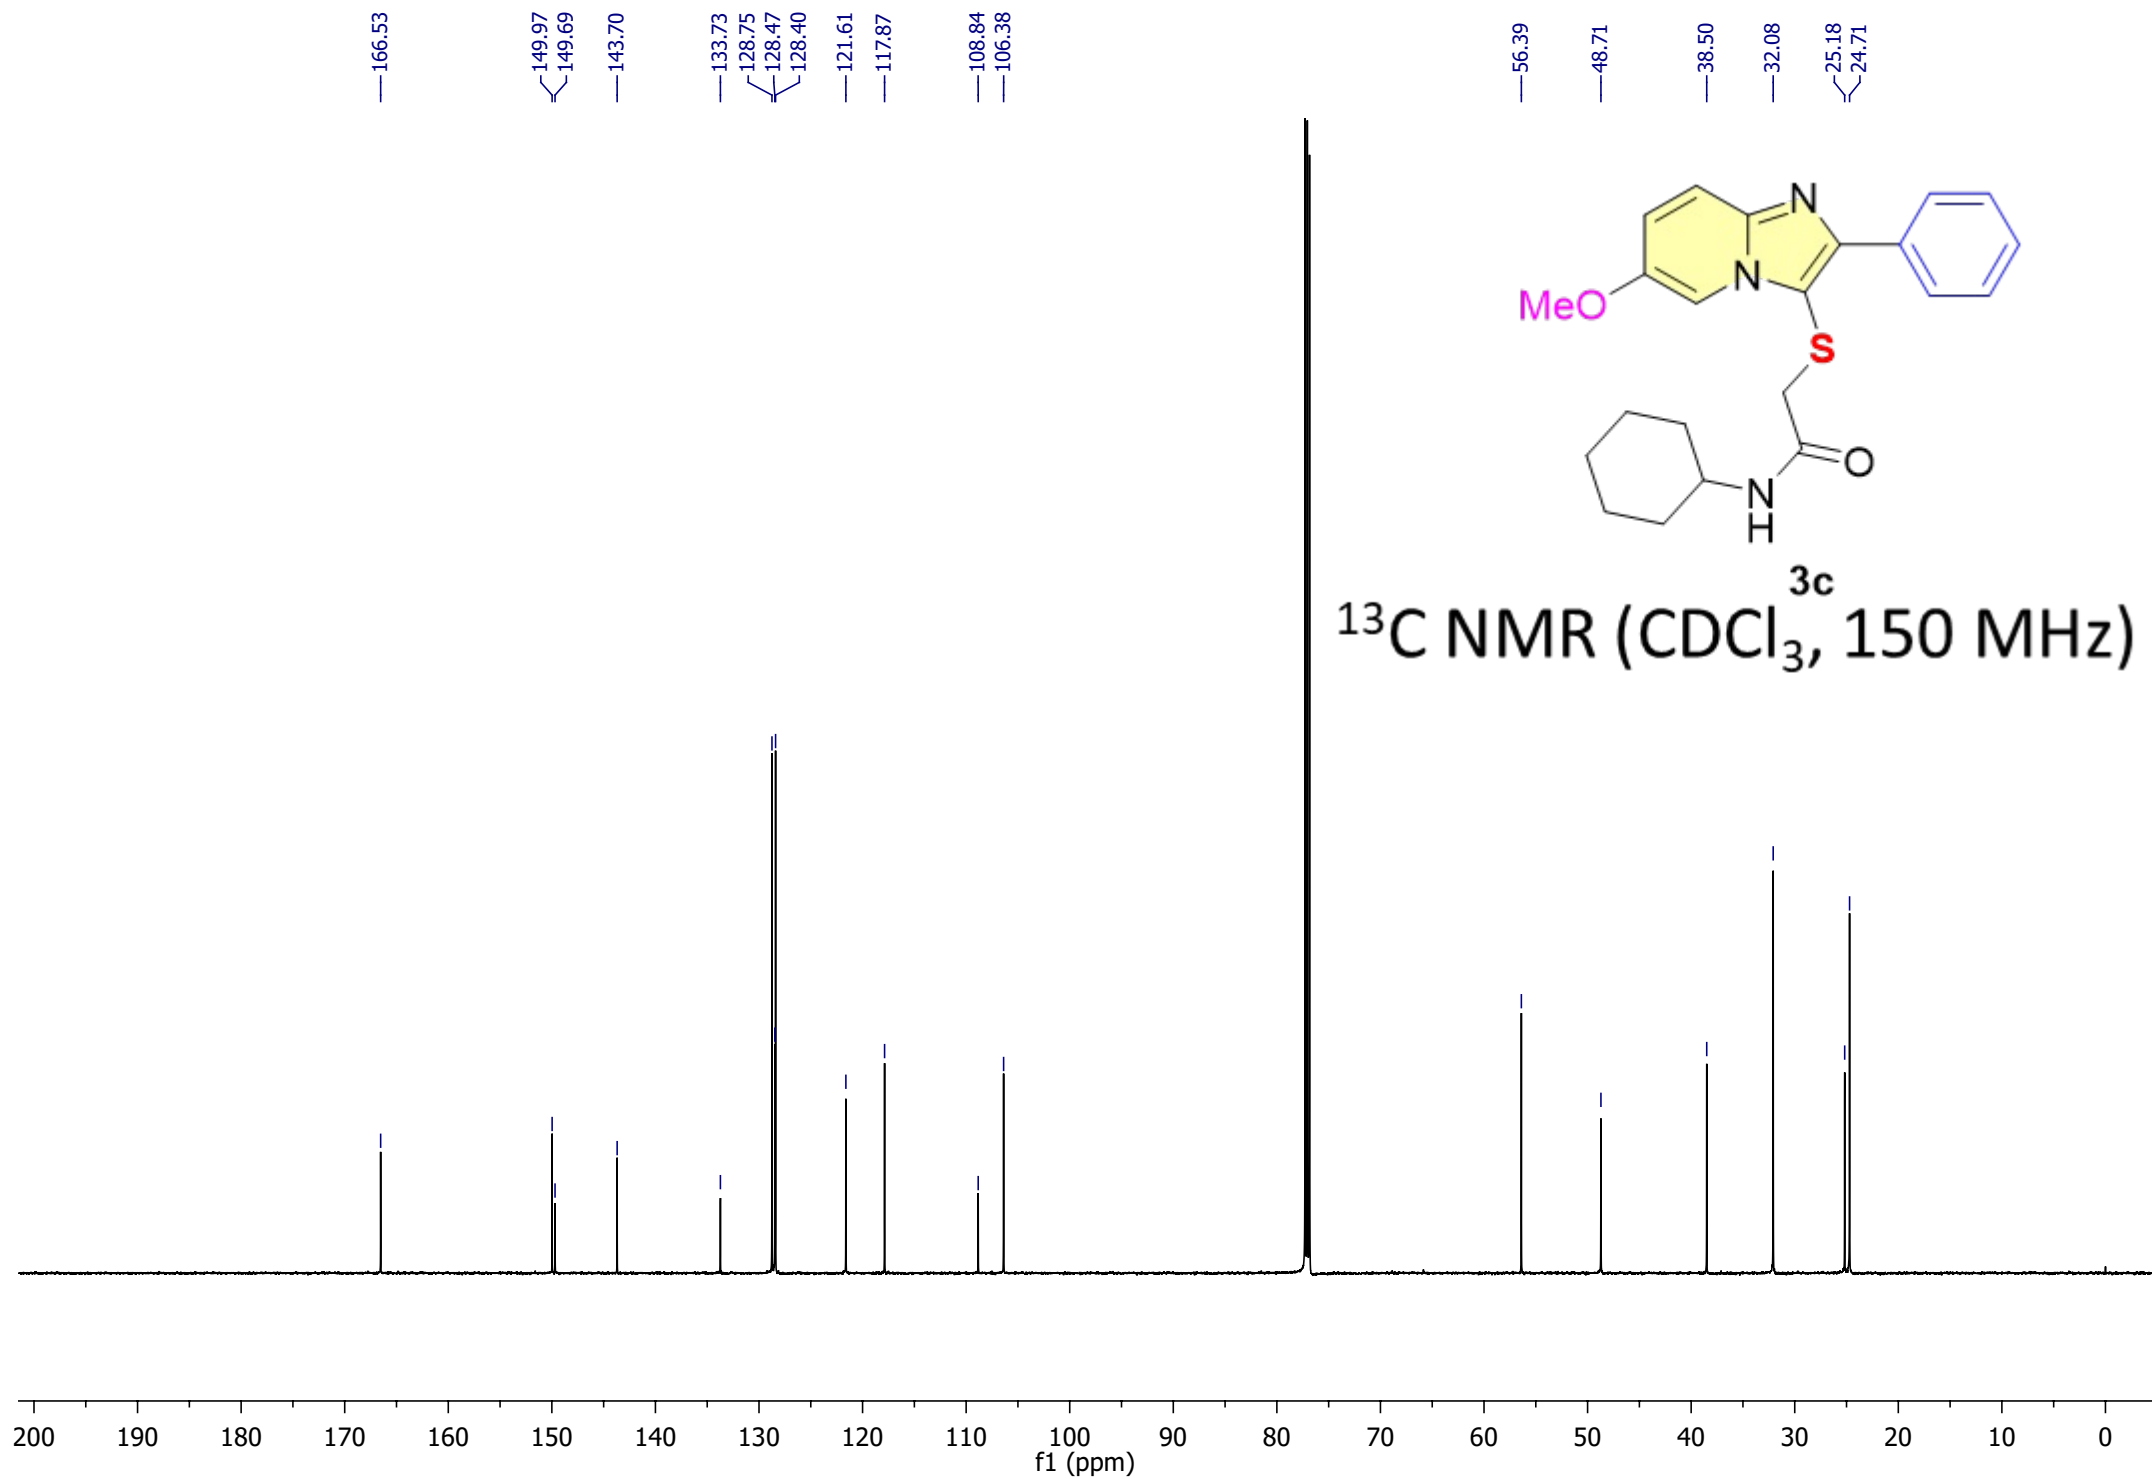

8.353  
8.121  
8.109  
7.548  
7.541  
7.533  
7.526  
7.436  
7.424  
7.412  
7.356  
7.345  
7.333  
7.168  
7.155  
7.141

5.786  
5.776

3.336  
3.323  
3.168

1.436  
1.410  
1.388  
1.093  
1.073  
0.884  
0.864  
0.856  
0.492  
0.473  
0.455

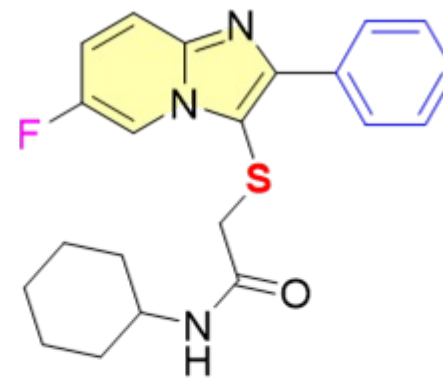

3d

$^1\text{H NMR}$  ( $\text{CDCl}_3$ , 600 MHz)

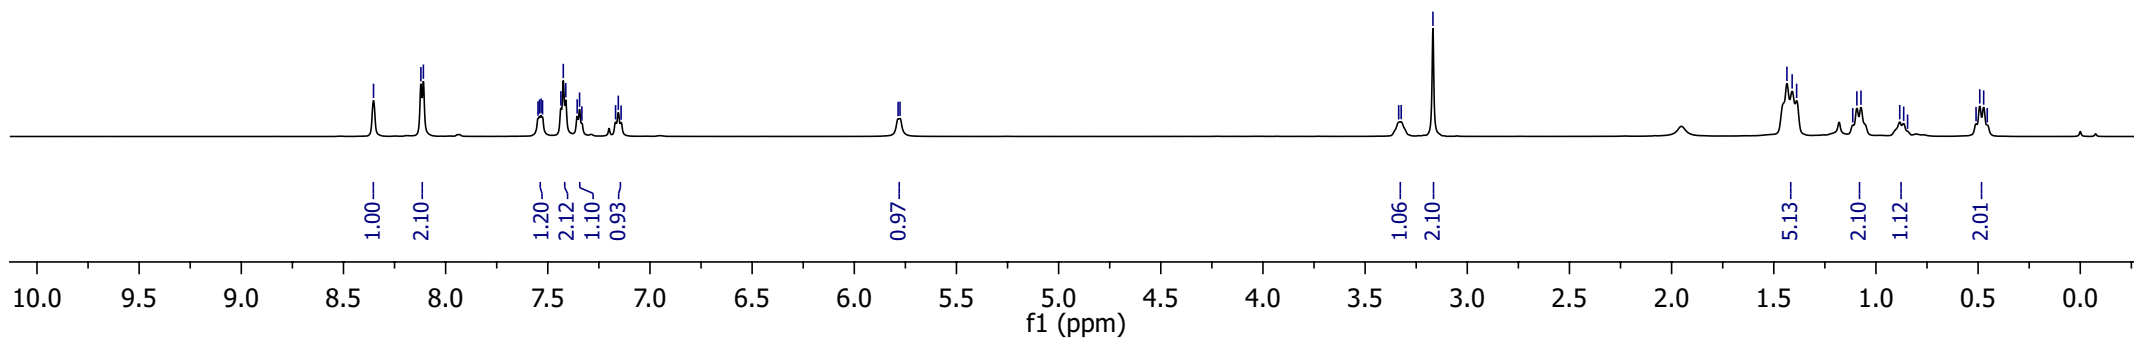

—166.287

—154.608

—153.026

—150.992

—144.294

—133.308

—128.801

—128.496

—118.564

—118.394

—118.242

—118.185

—111.752

—111.475

—109.788

—48.722

—38.480

—32.132

—25.205

—24.700

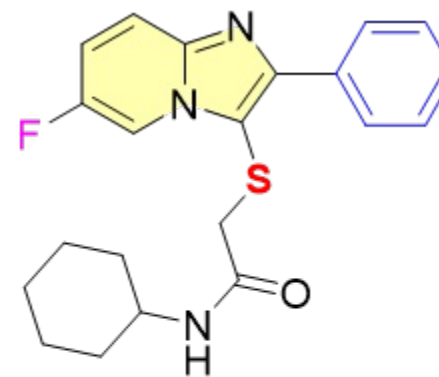

3d

$^{13}\text{C}$  NMR ( $\text{CDCl}_3$ , 150 MHz)

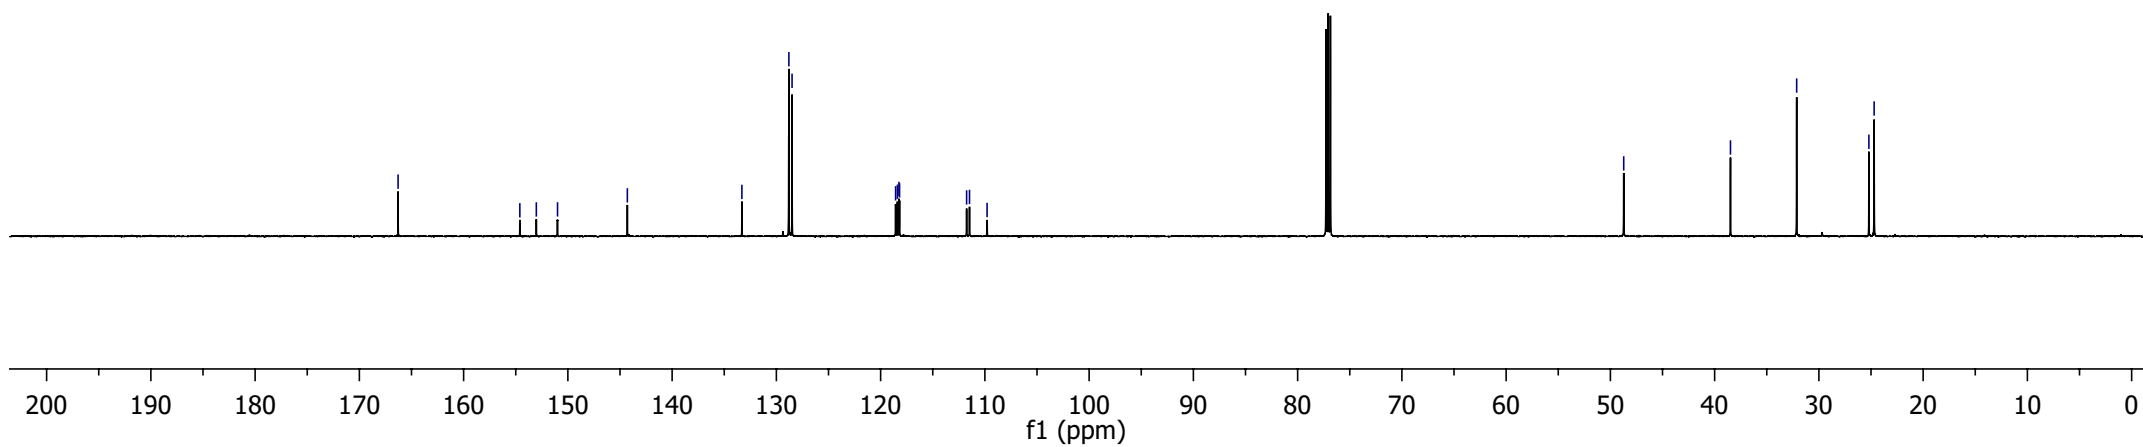

8.459  
8.447  
8.227  
8.215  
7.651  
7.650  
7.528  
7.515  
7.502  
7.447  
7.435  
6.957  
6.954  
6.945  
6.942

5.630  
5.618

3.418  
3.411  
3.405  
3.400  
3.393  
3.387  
3.368  
3.251

1.533  
1.527  
1.512  
1.461  
1.458  
1.441

1.171  
1.150  
0.967  
0.947  
0.581  
0.576  
0.560  
0.557  
0.541  
0.538  
0.522  
0.516

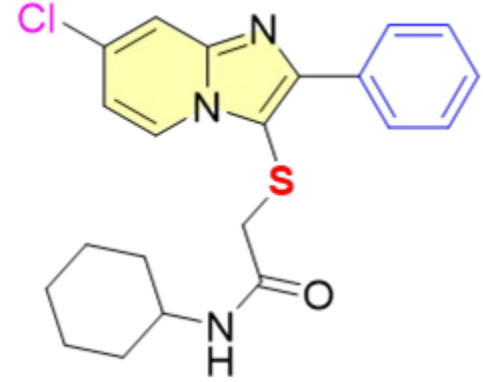

3e

<sup>1</sup>H NMR (CDCl<sub>3</sub>, 600 MHz)

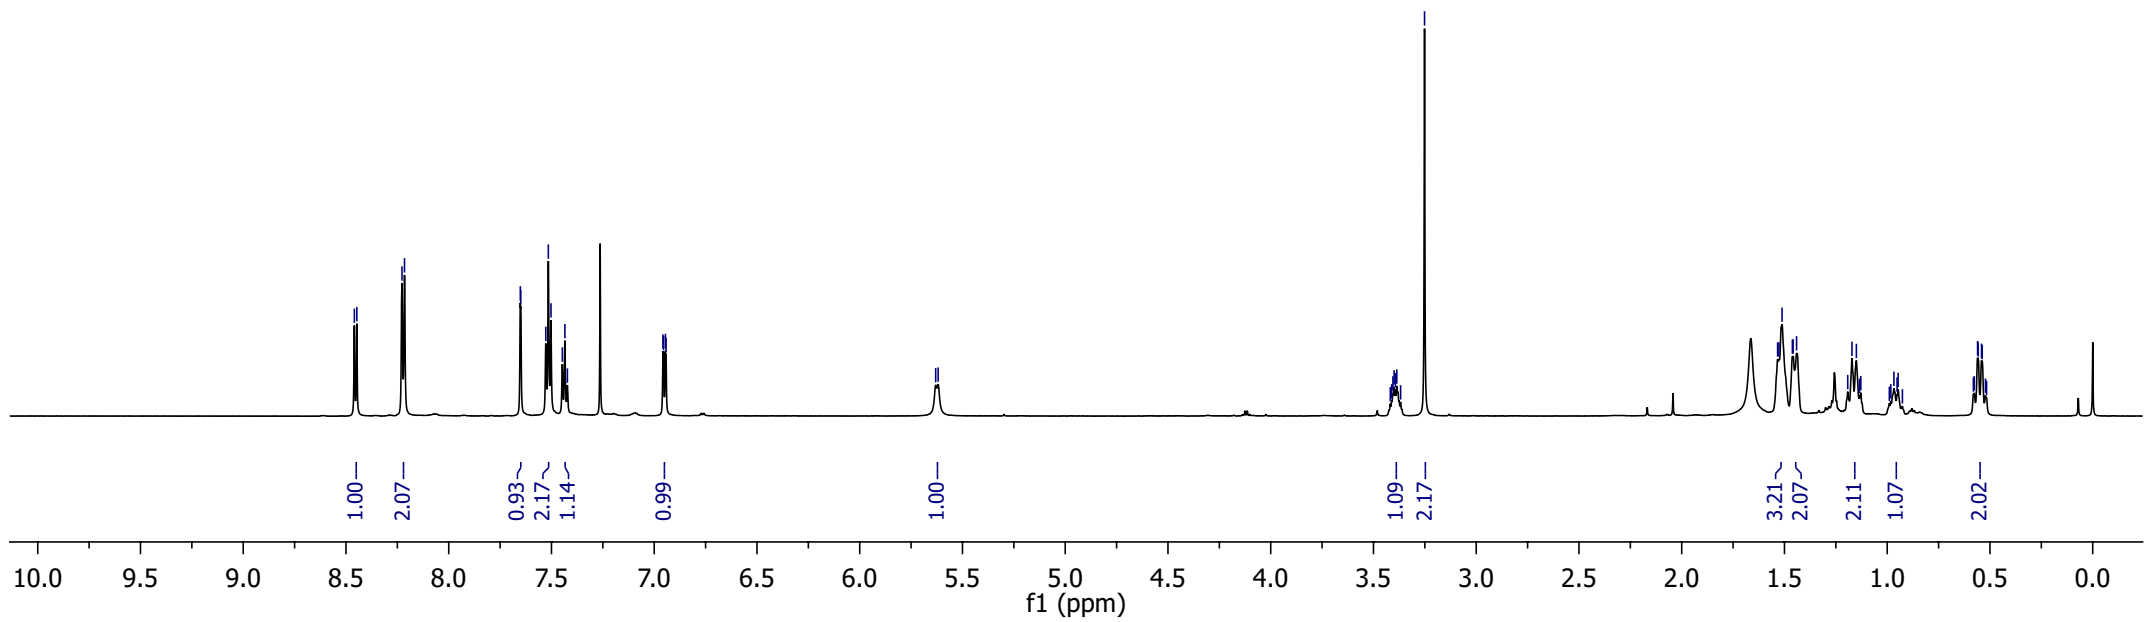

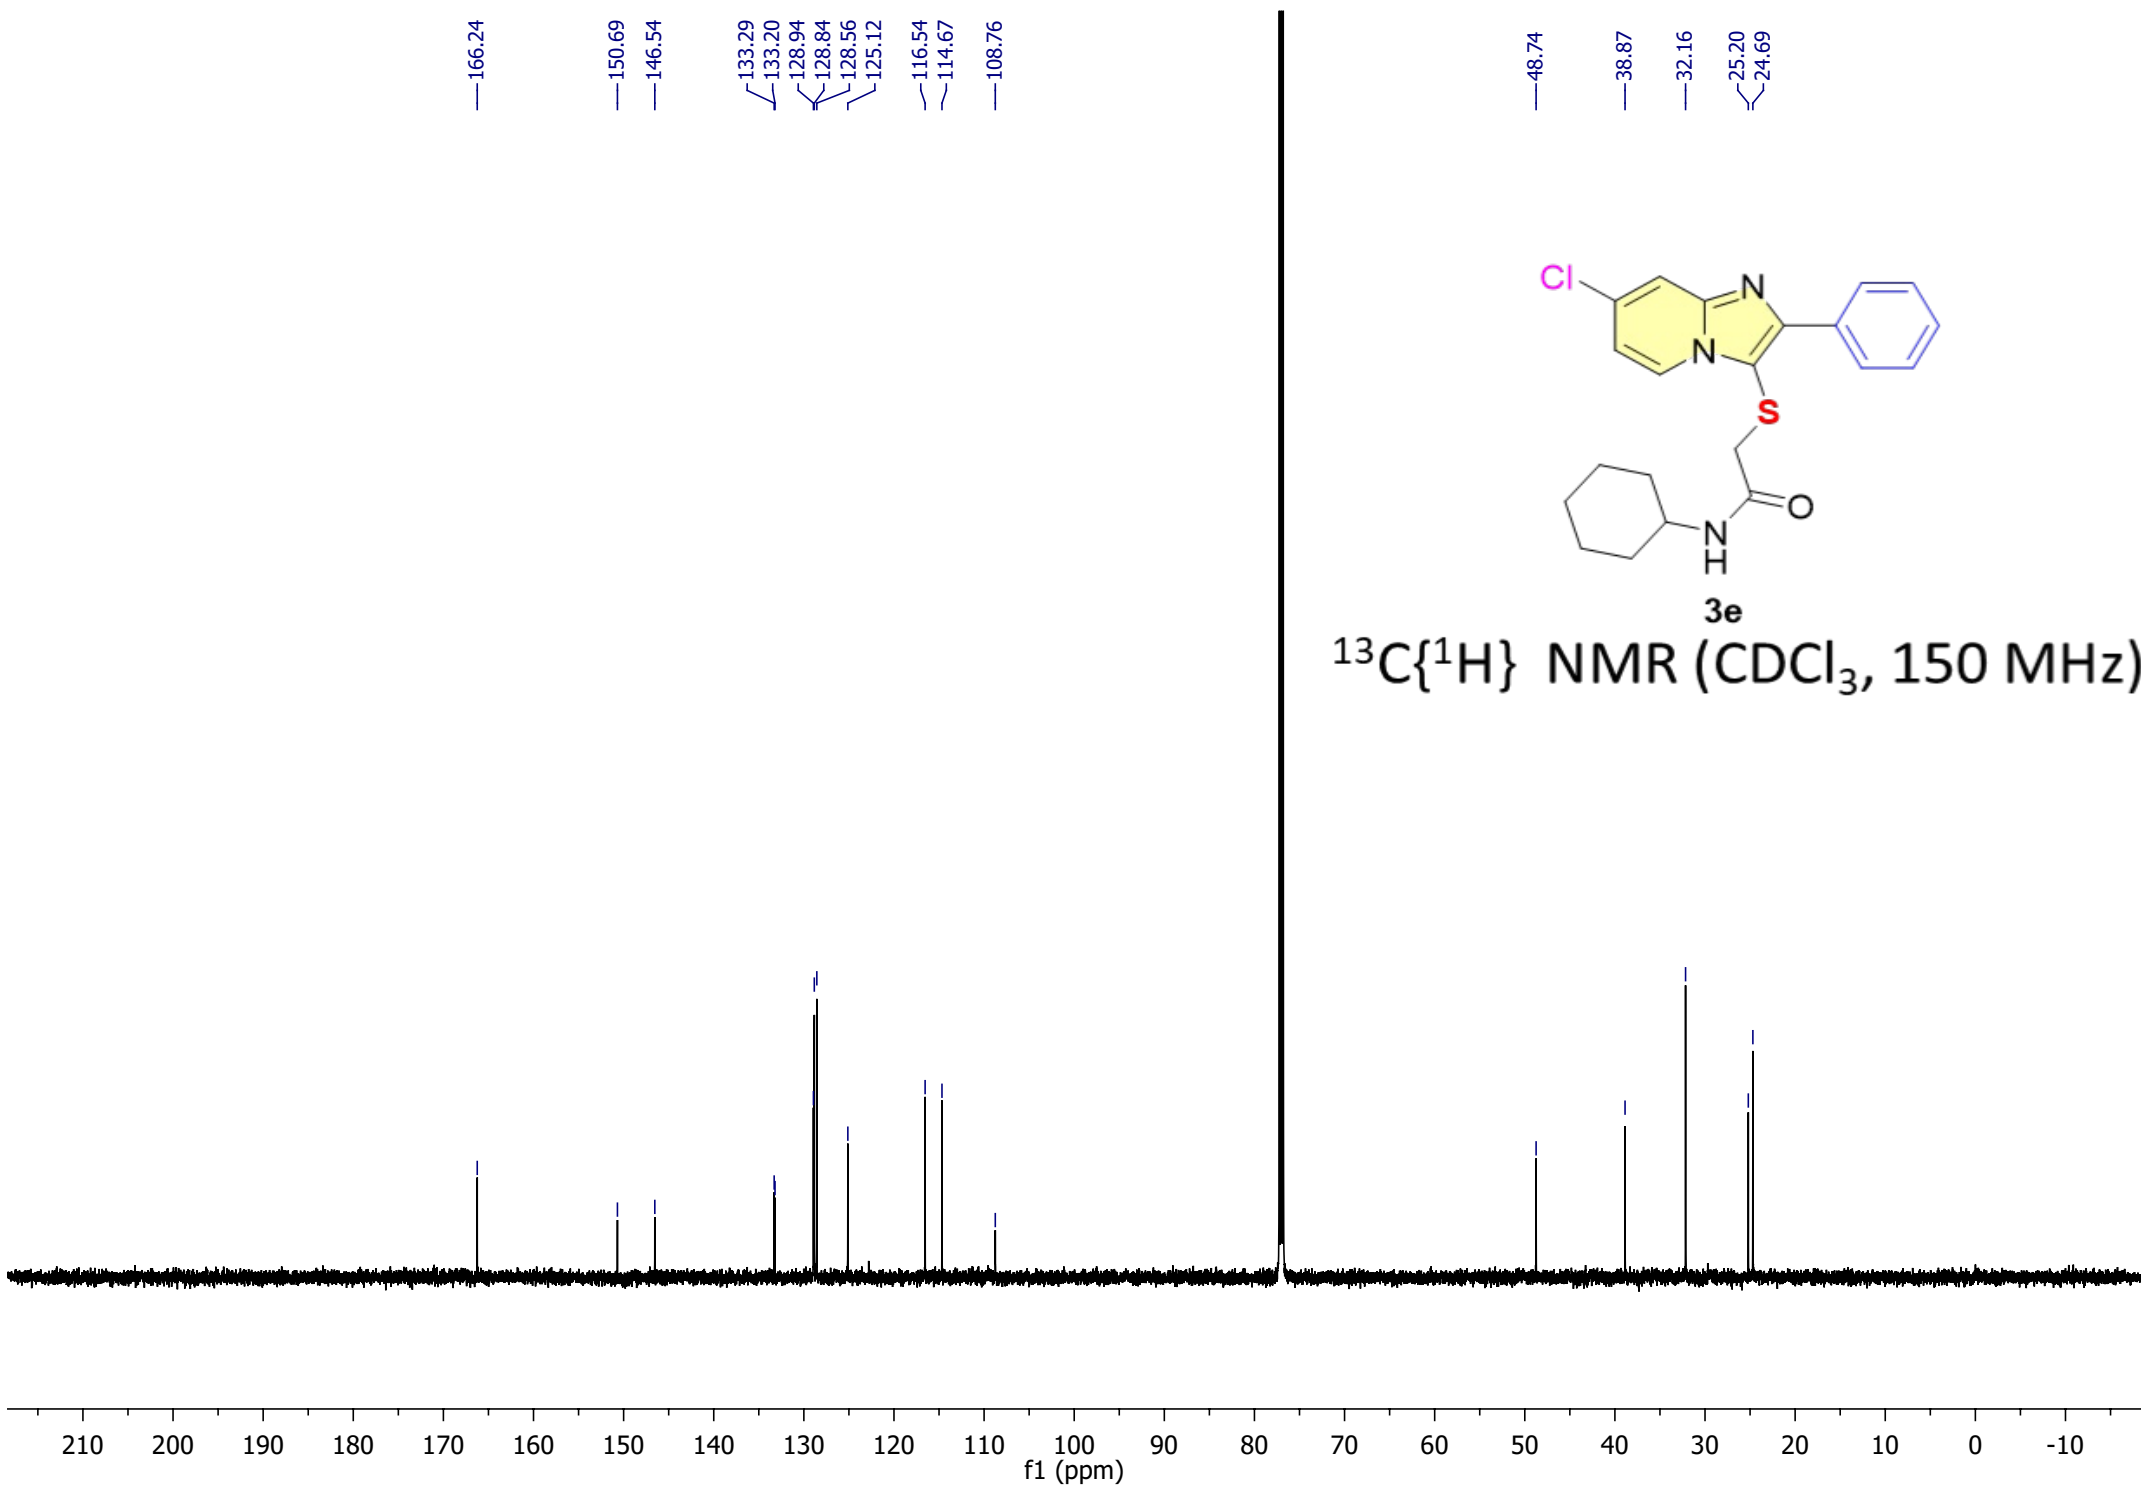

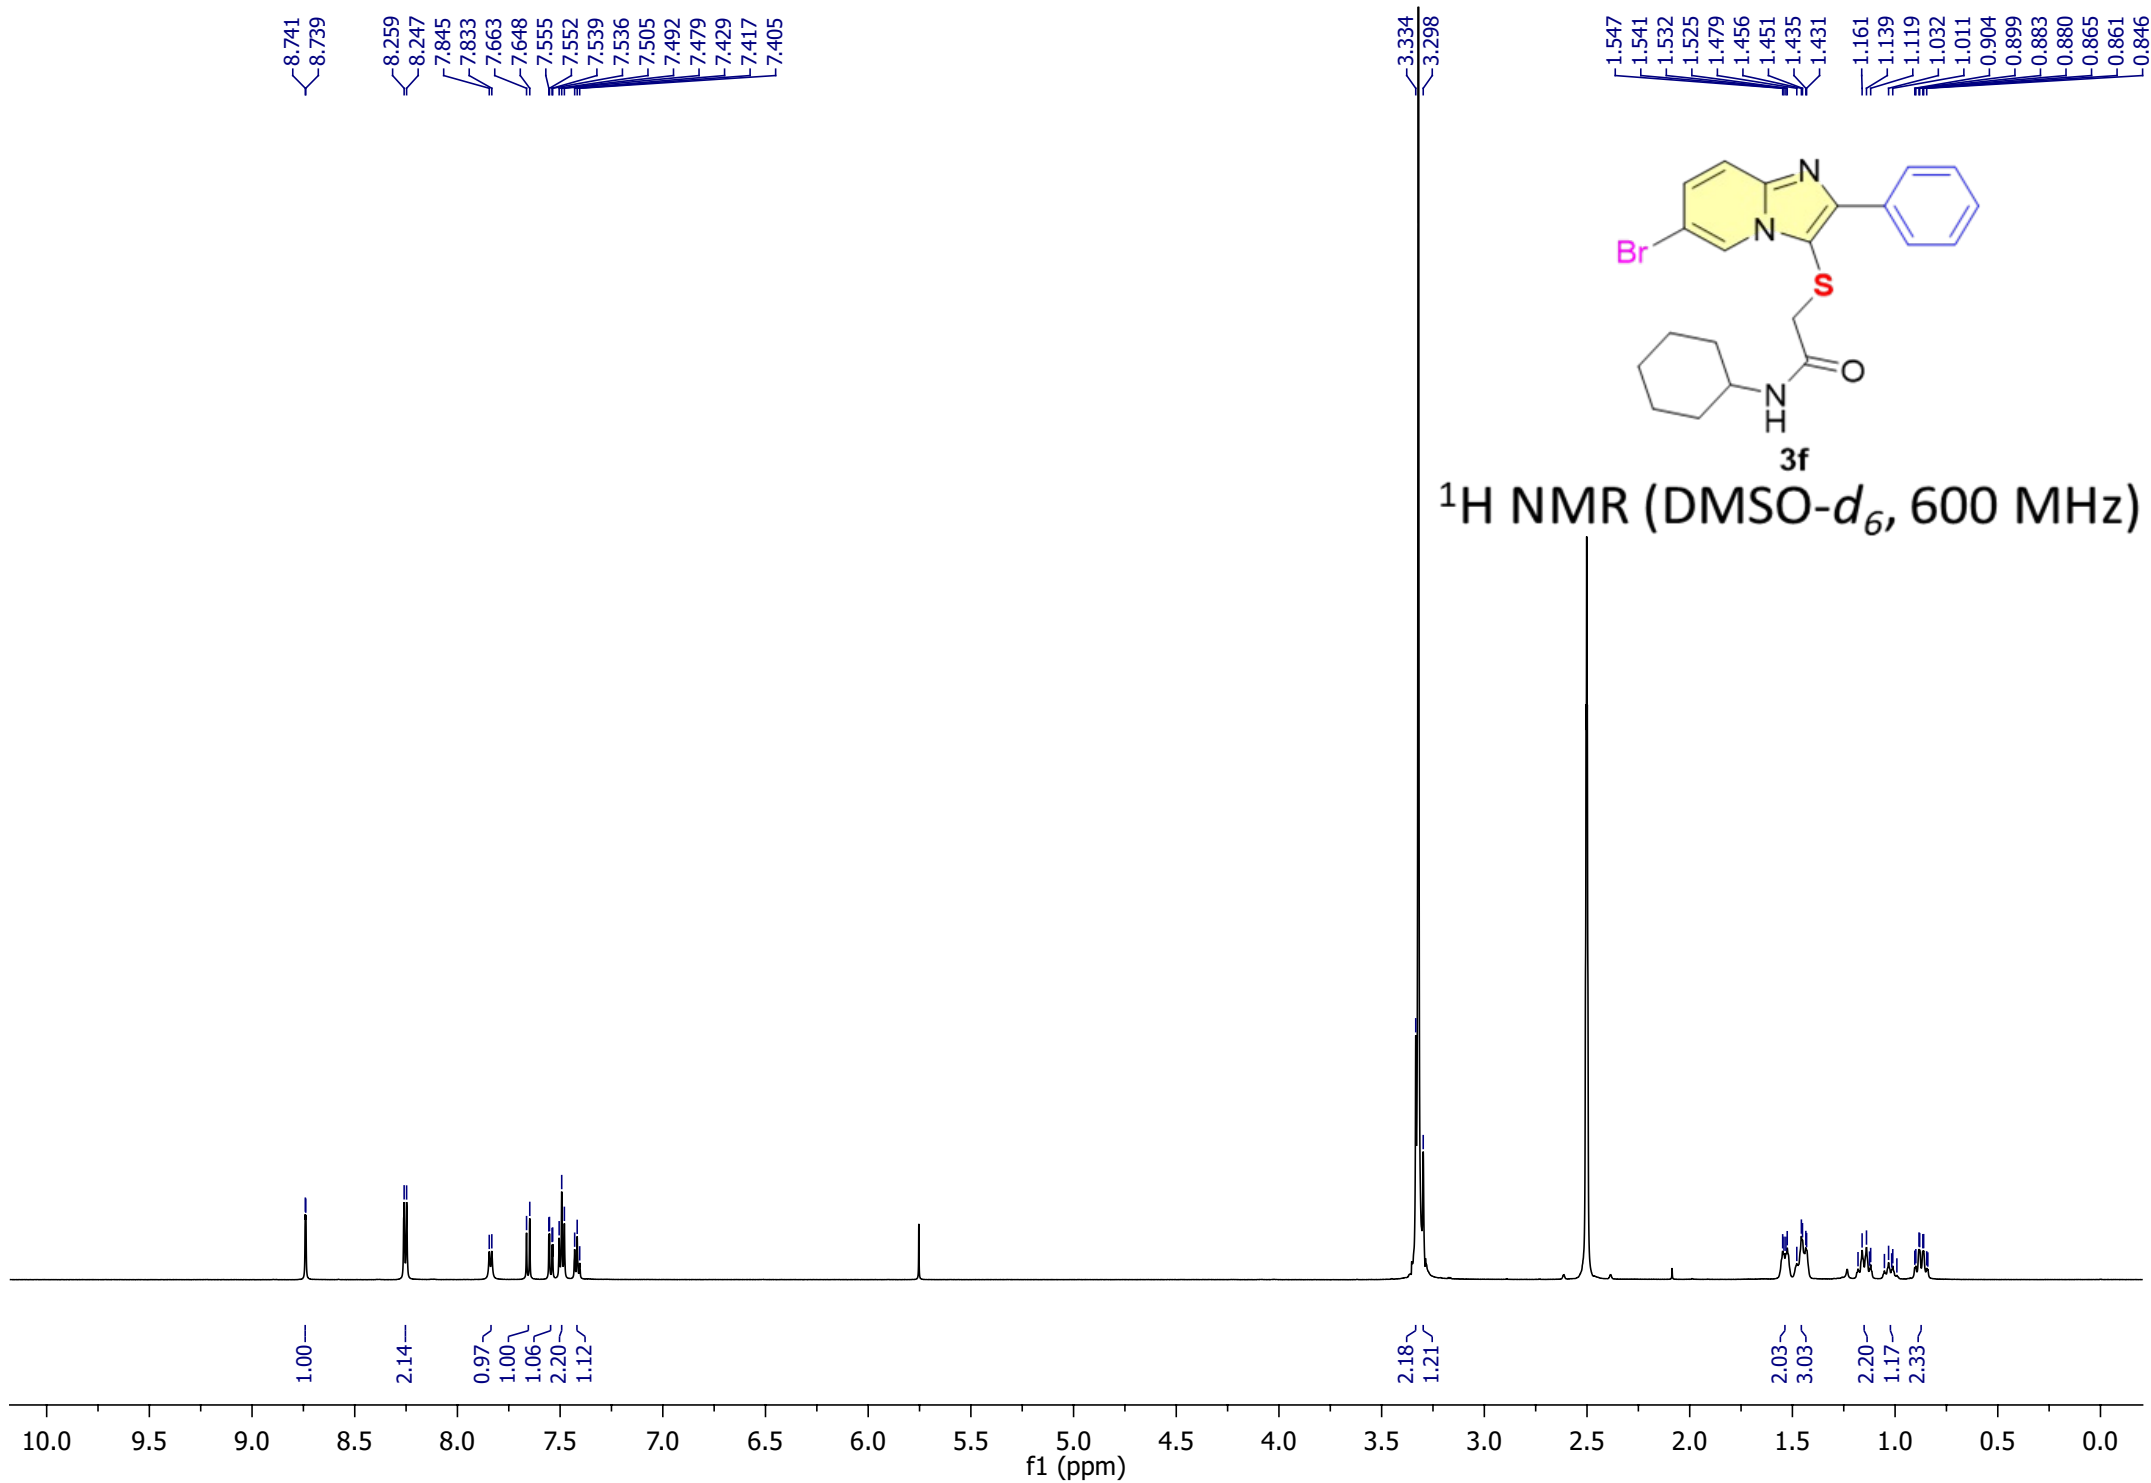

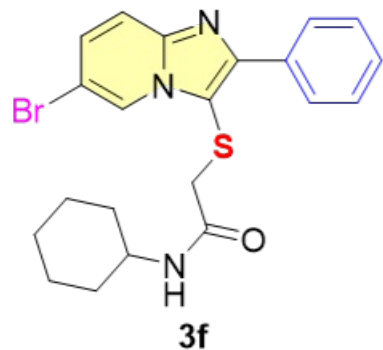

$^{13}\text{C}$  NMR (DMSO- $d_6$ , 150 MHz)

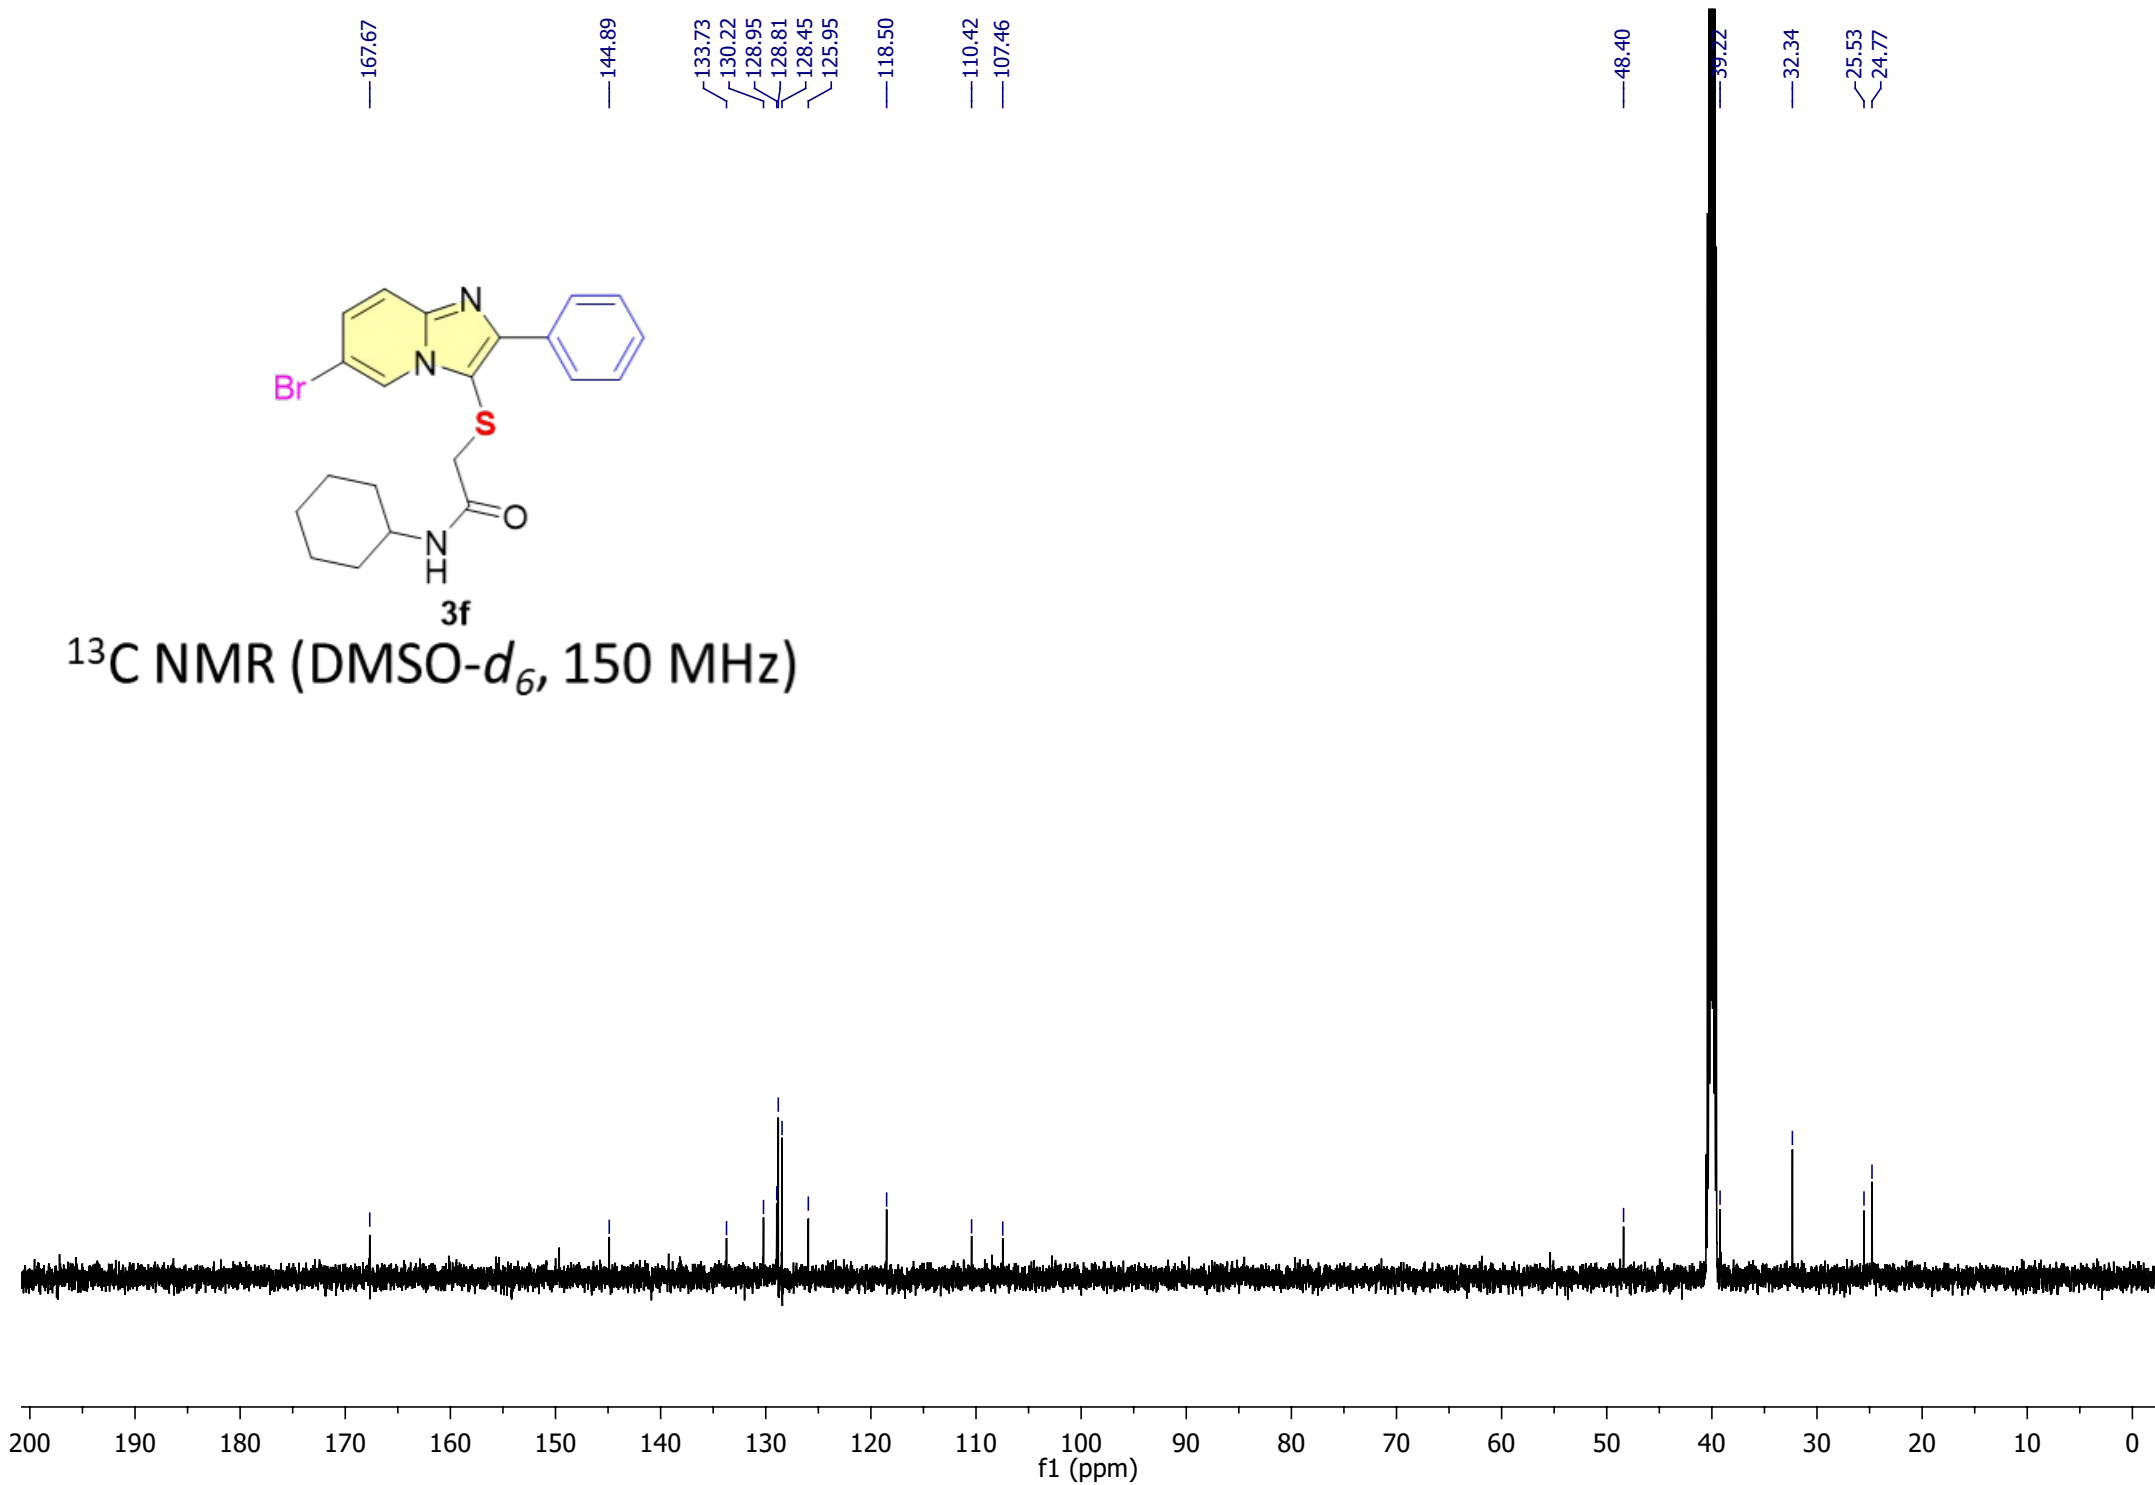

8.626  
8.614  
8.214  
8.201  
7.896  
7.494  
7.482  
7.469  
7.417  
7.102  
7.090

5.873  
5.860

3.389  
3.371  
3.365  
3.358  
3.340  
3.184

1.508  
1.496  
1.424  
1.405  
1.171  
1.150  
1.129  
1.107  
0.971  
0.950  
0.929  
0.908  
0.600  
0.582  
0.563  
0.545

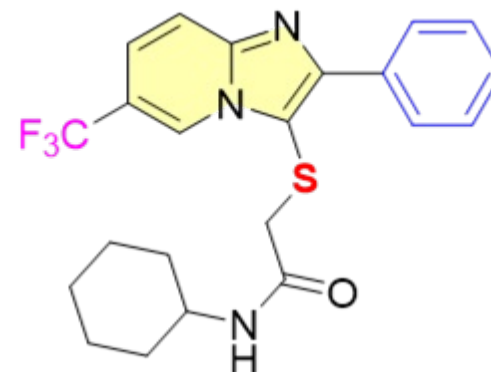

3g

<sup>1</sup>H NMR (CDCl<sub>3</sub>, 600 MHz)

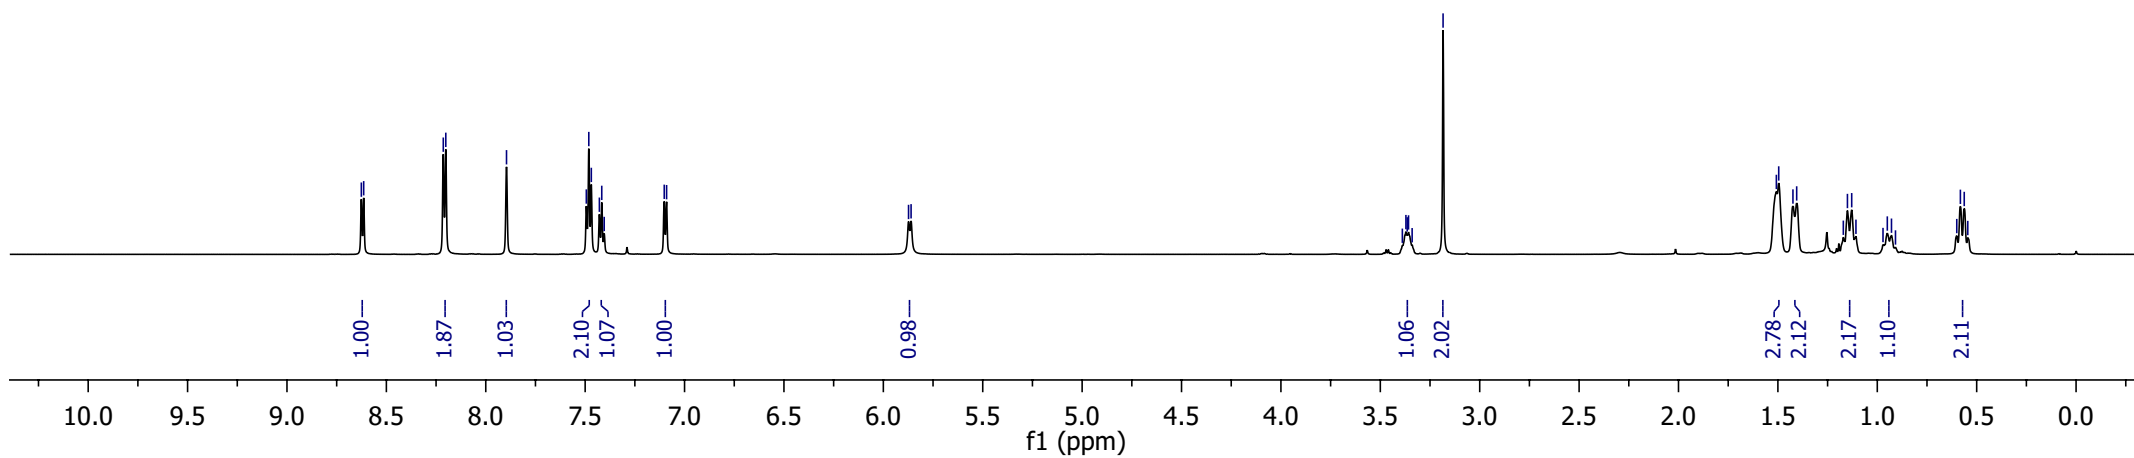

—166.34

—151.30

—144.82

132.87

129.06

128.76

128.45

125.84

124.03

122.22

115.36

115.33

115.30

115.27

110.57

108.73

108.71

—48.75

—38.82

—32.17

25.17

24.62

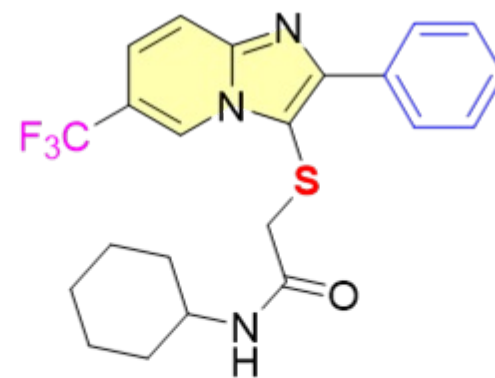

**3g**

**$^{13}\text{C}$  NMR (CDCl<sub>3</sub>, 150 MHz)**

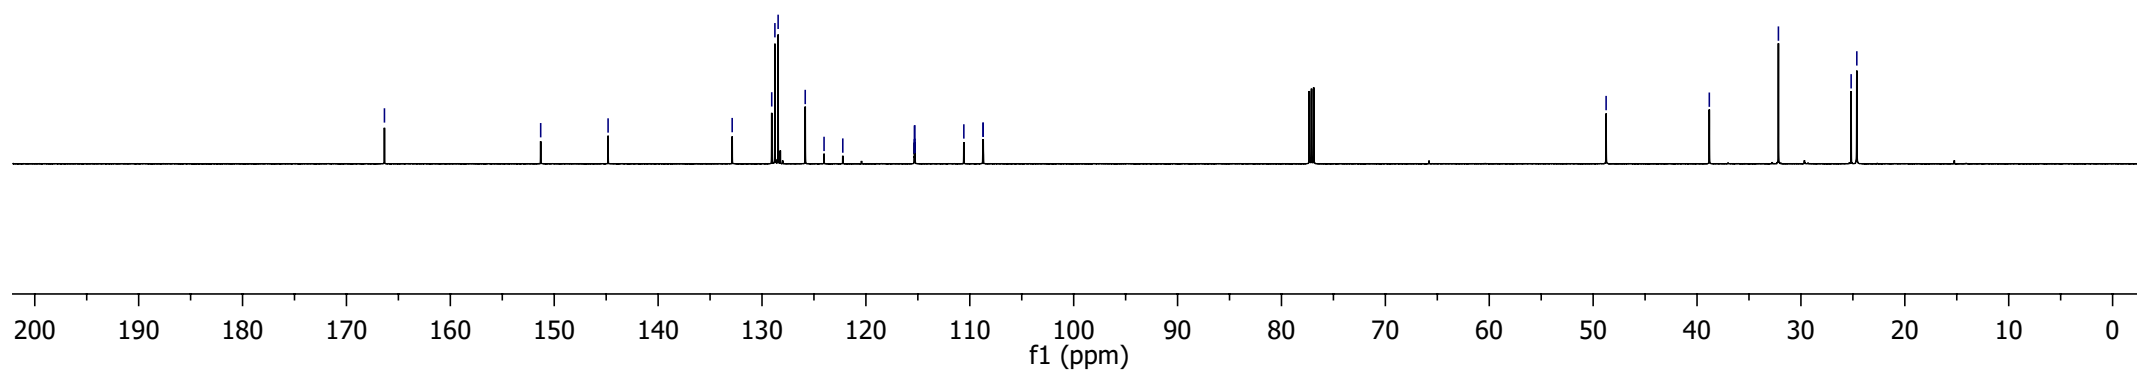

8.479  
8.468  
8.122  
8.109  
7.650  
7.636  
7.326  
7.313  
6.949  
6.938

5.842  
5.829

3.406  
3.400  
3.393  
3.387  
3.381  
3.374  
3.368  
3.362  
3.356  
3.349  
3.343  
3.242  
2.426

1.511  
1.494  
1.437  
1.417  
1.168  
1.148  
1.126  
1.105  
0.957  
0.936  
0.914  
0.889  
0.520  
0.499  
0.479  
0.460

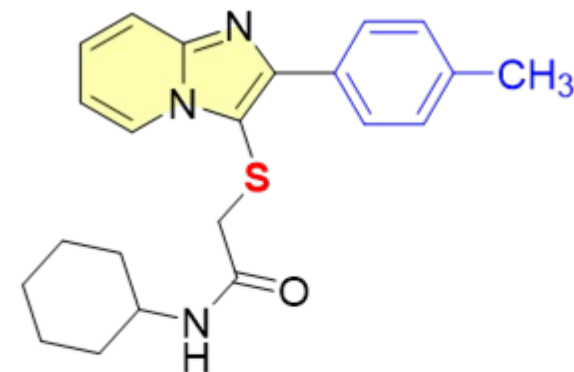

3h

$^1\text{H NMR (CDCl}_3\text{, 600 MHz)}$

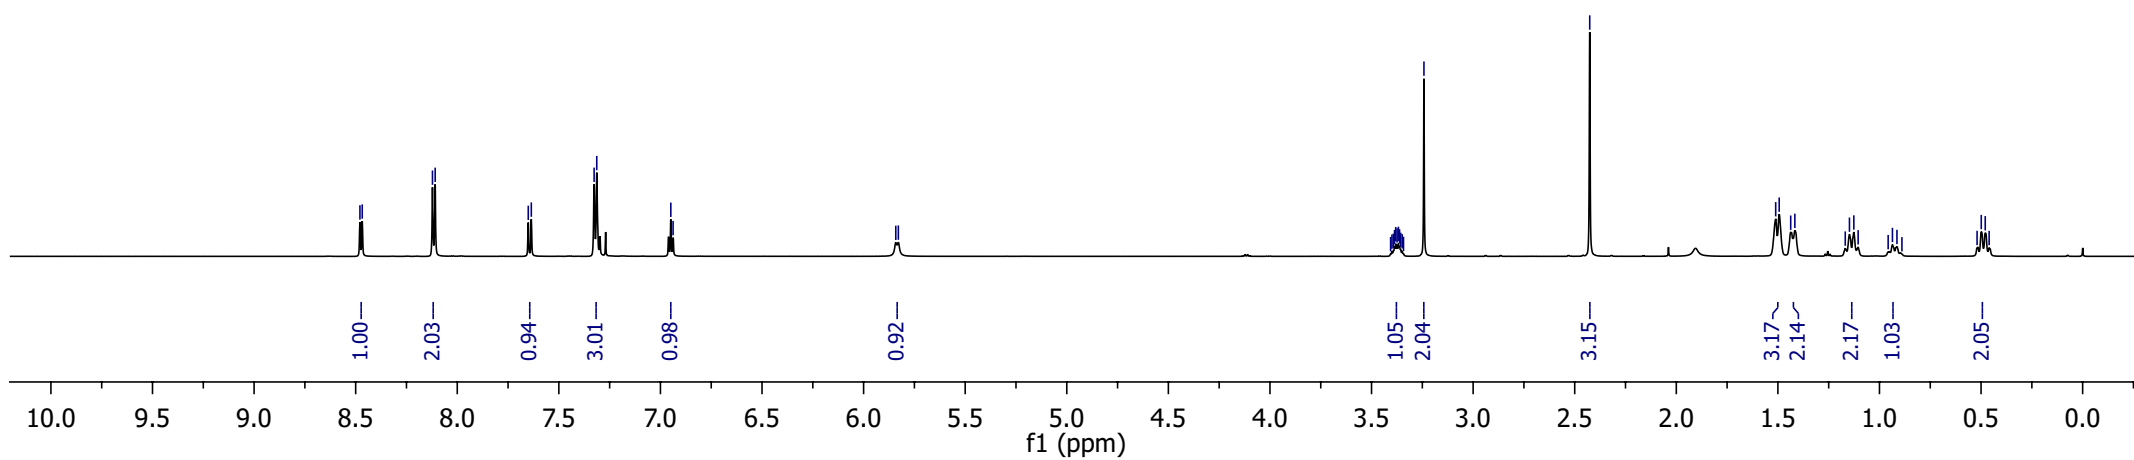

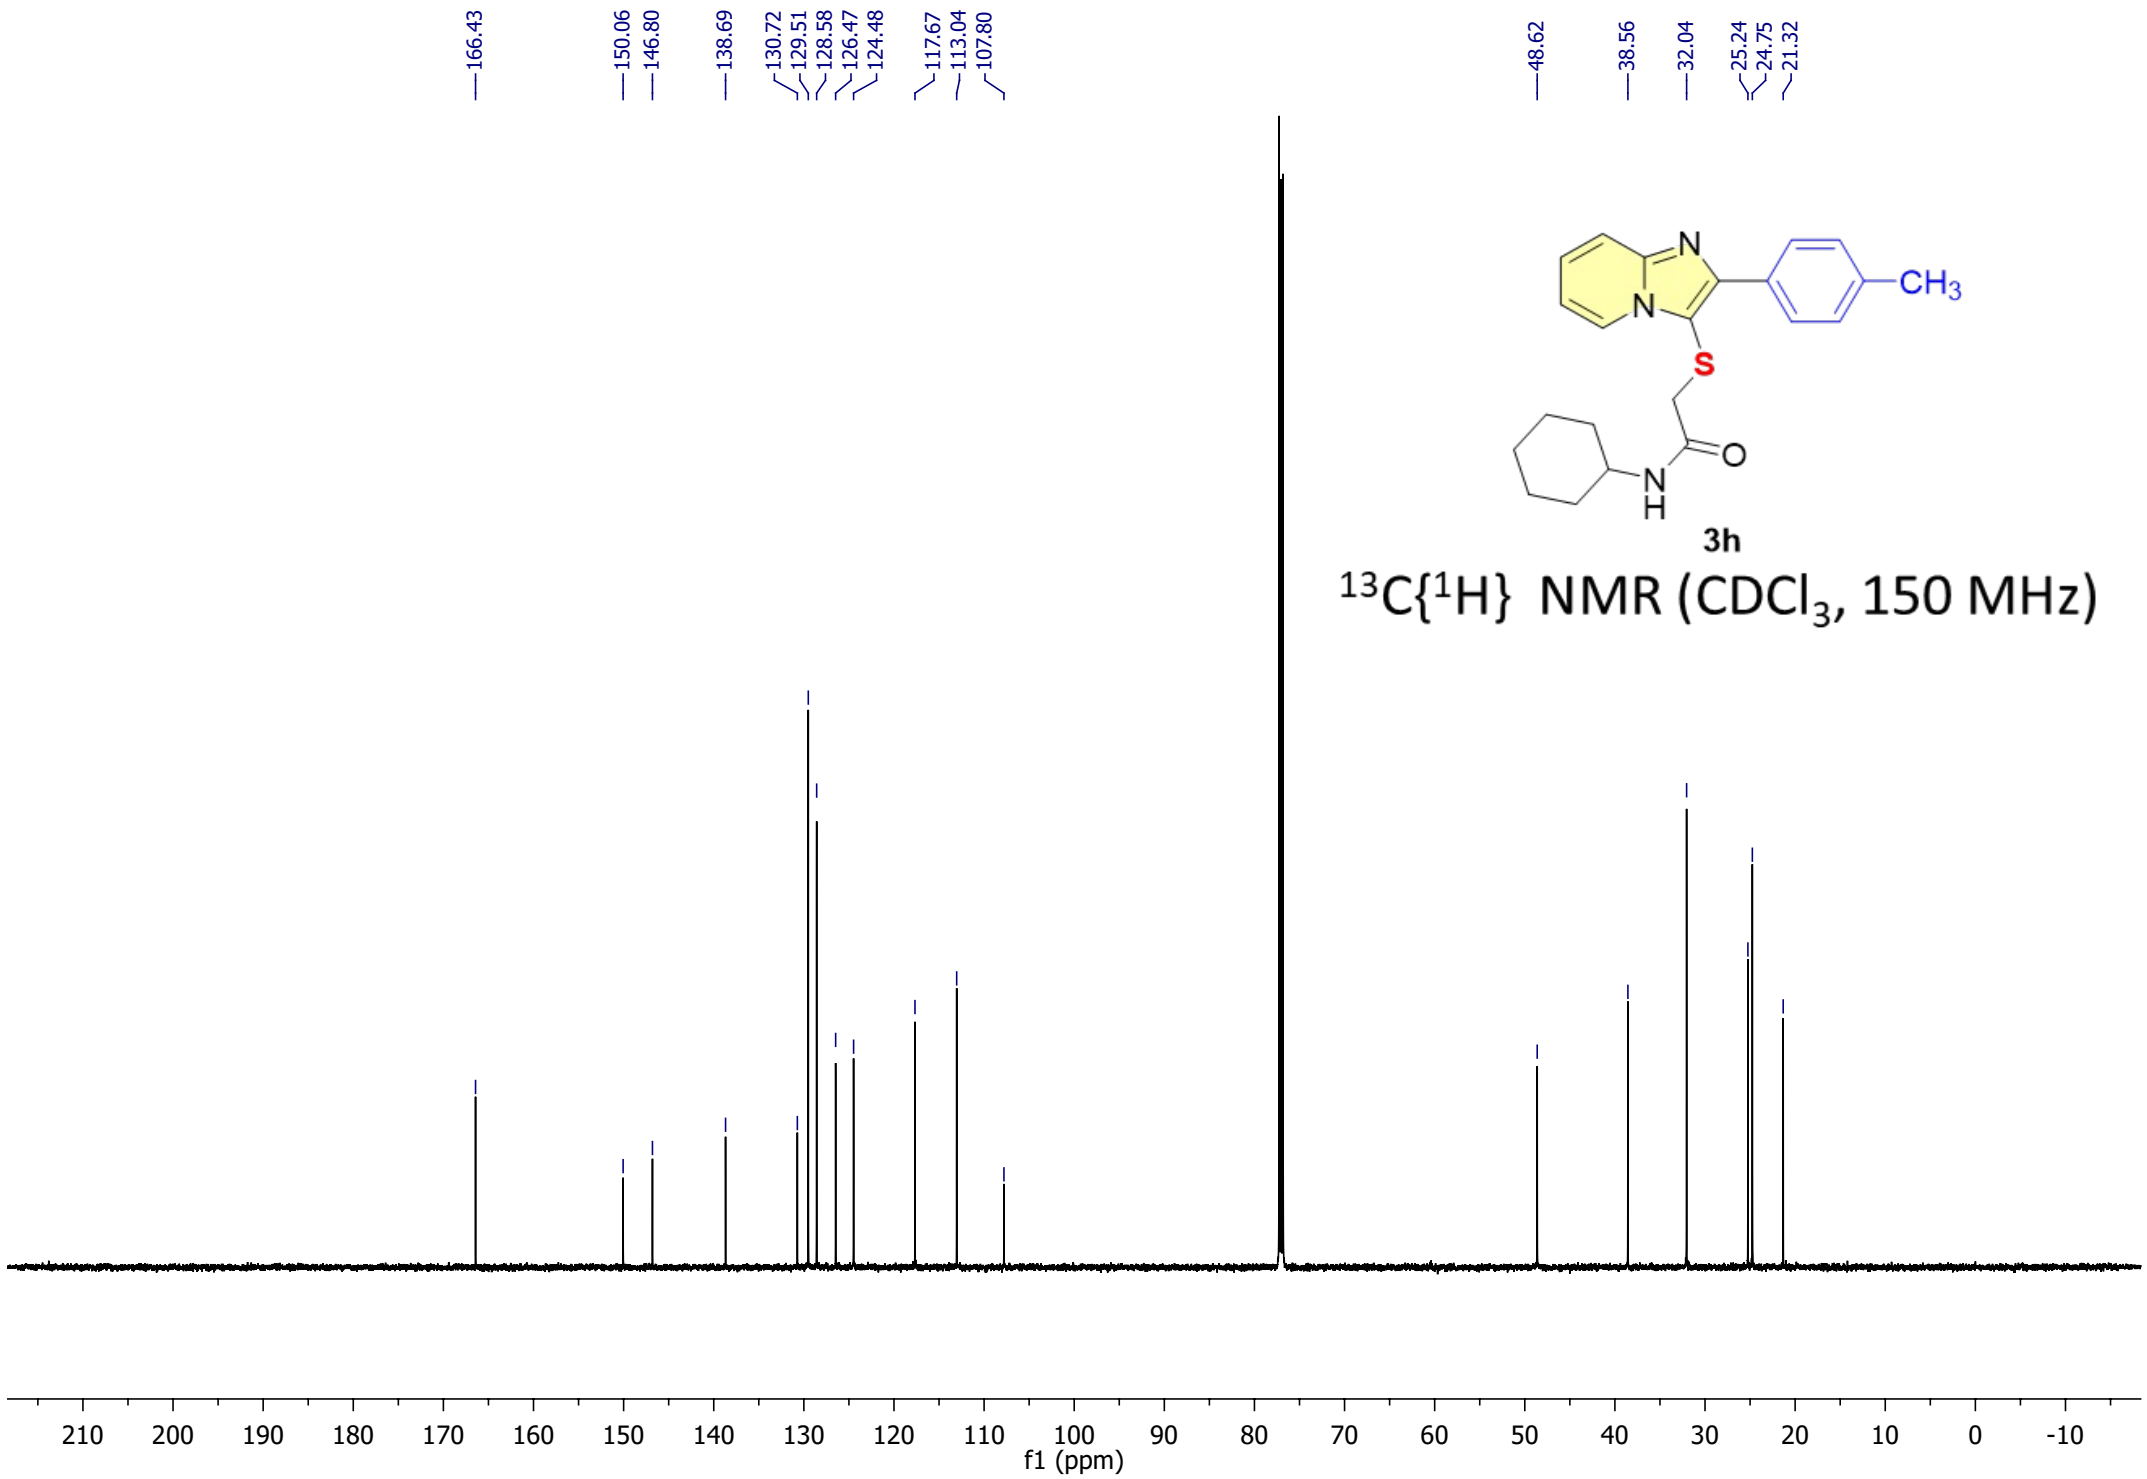

8.507  
8.496  
8.254  
8.244  
8.240  
8.231

7.652  
7.637  
7.347  
7.335  
7.321  
7.215  
7.201  
7.186  
6.984  
6.973  
6.961

5.678  
5.666

3.437  
3.431  
3.418  
3.412  
3.406  
3.399  
3.394  
3.381  
3.375  
3.248

1.816  
1.524  
1.518  
1.459  
1.174  
1.152  
0.979  
0.868  
0.868  
0.583  
0.564  
0.545

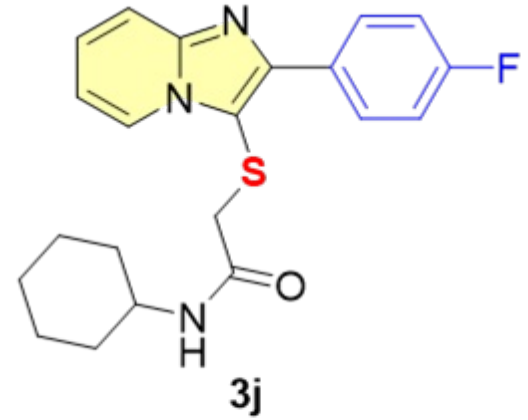

<sup>1</sup>H NMR (CDCl<sub>3</sub>, 600 MHz)

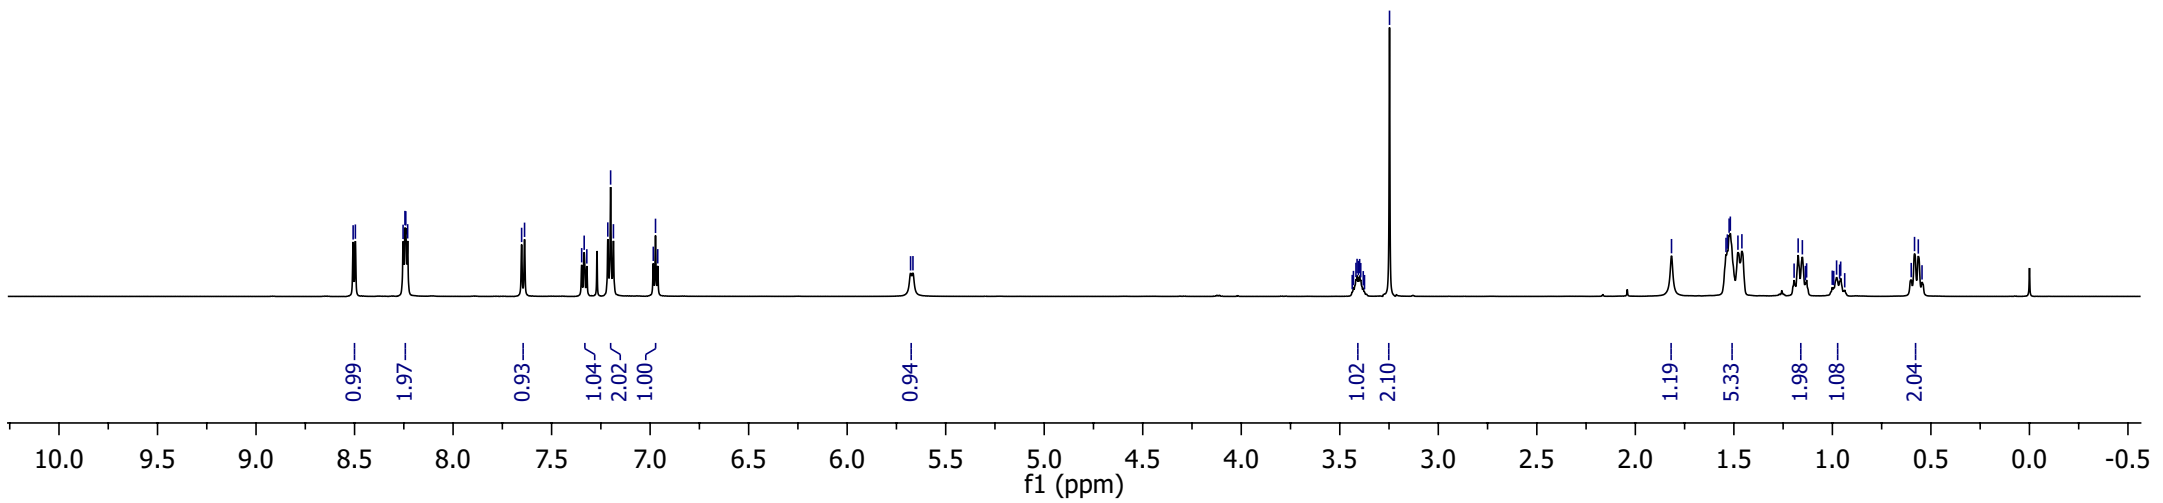

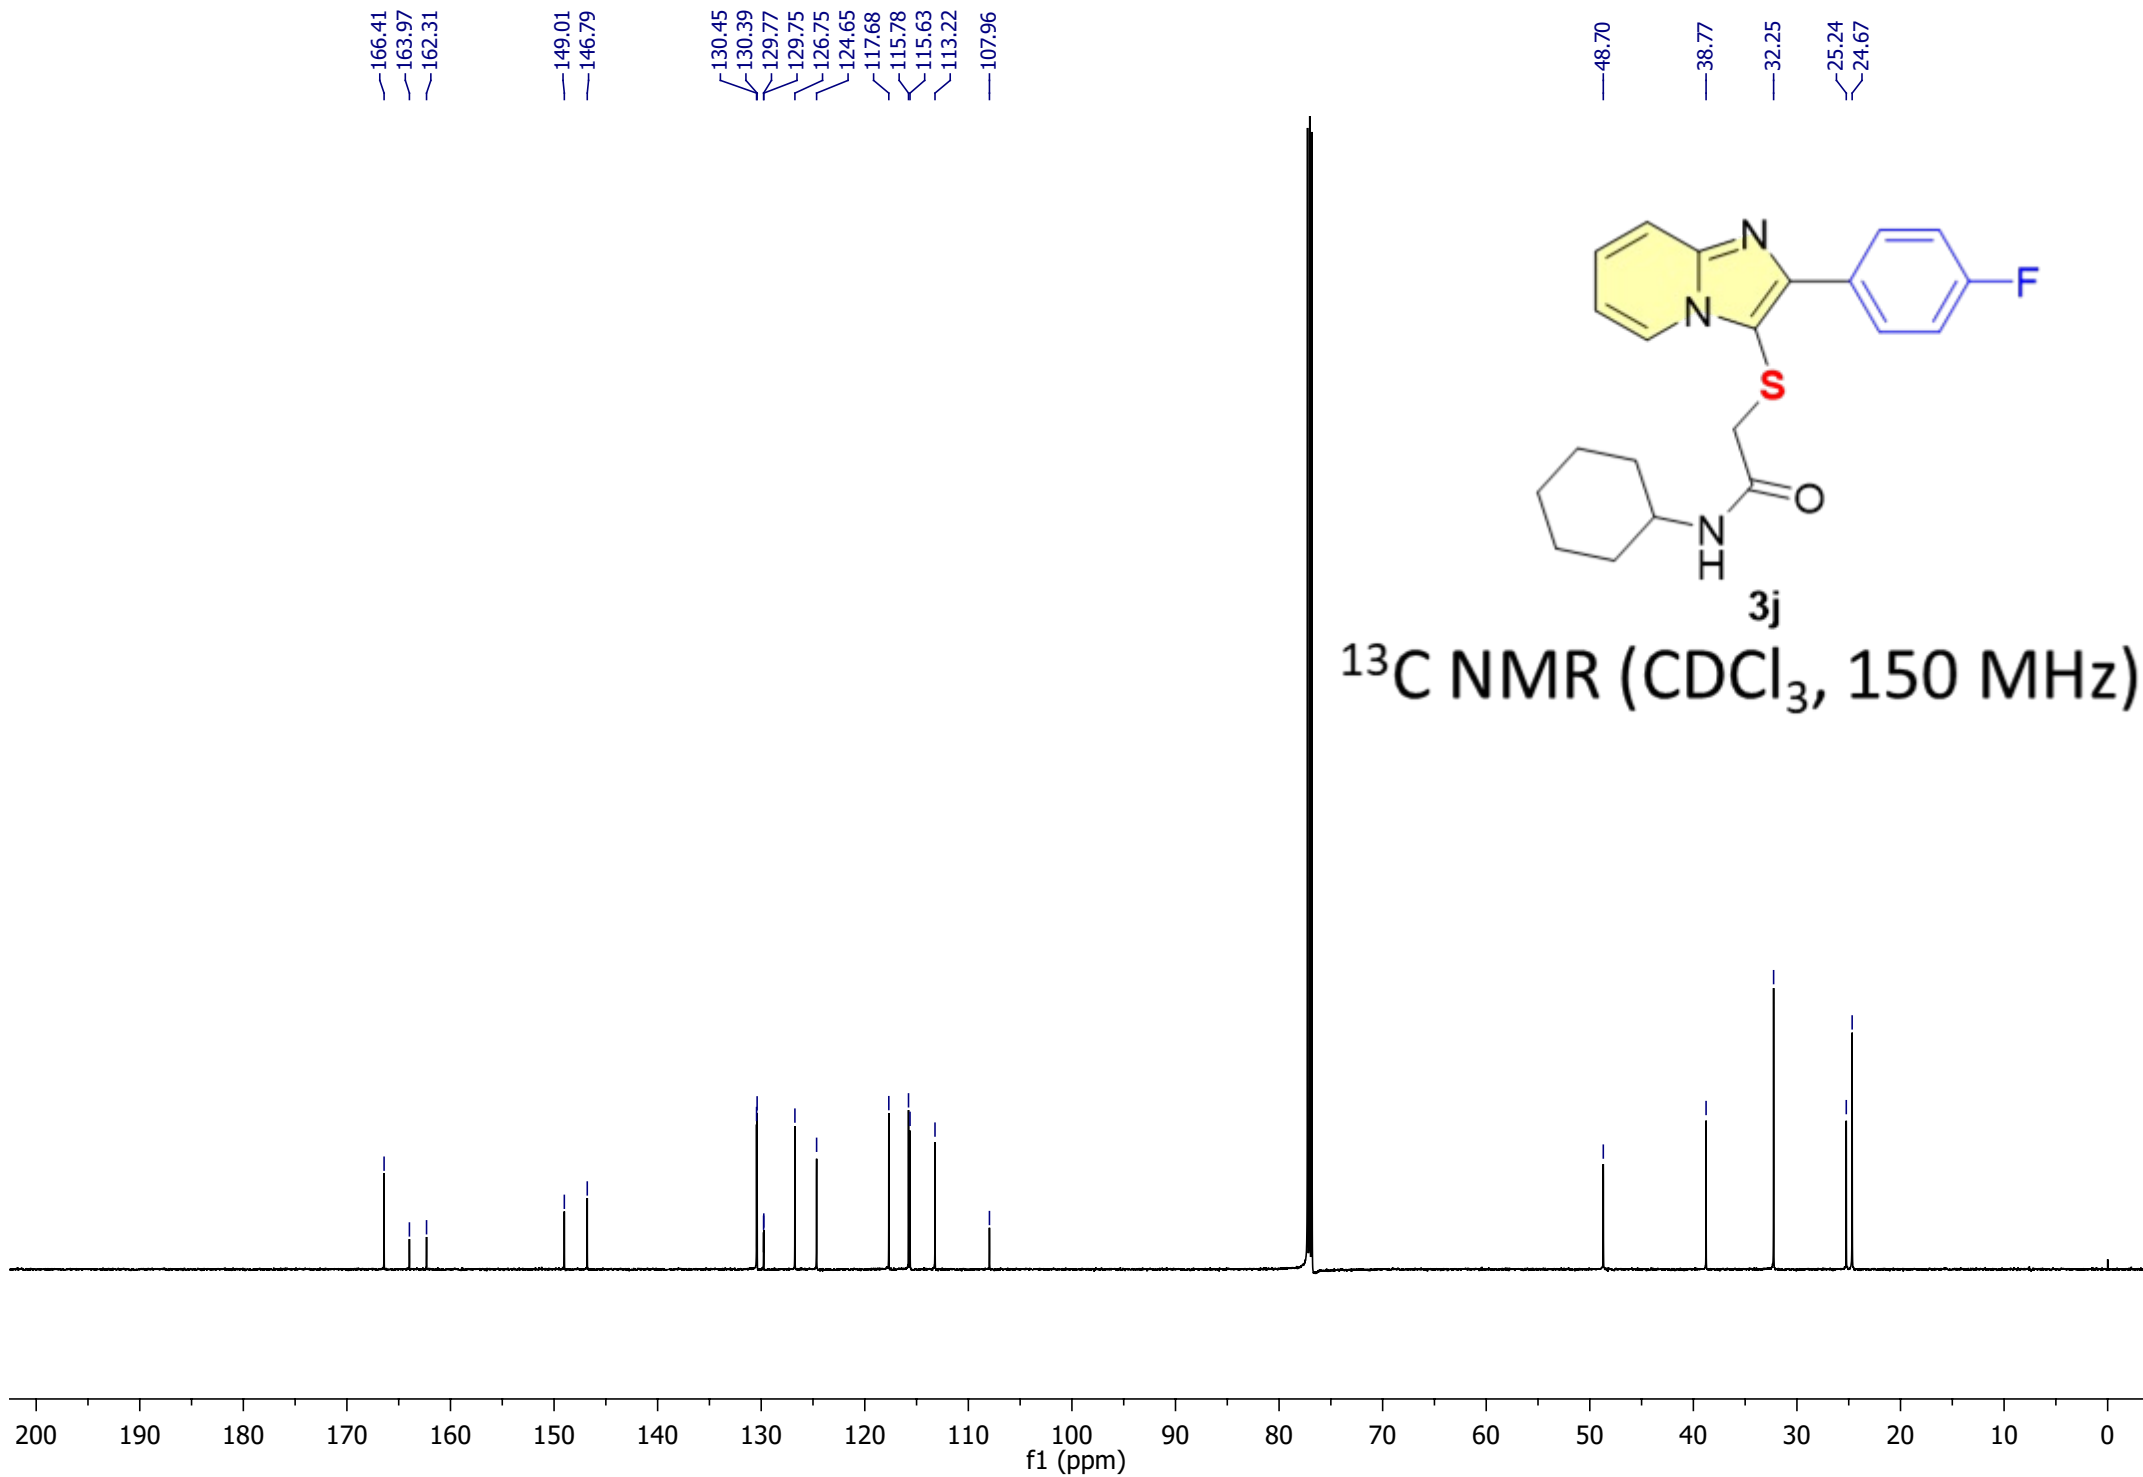

8.509  
8.498  
8.210  
8.197  
7.659  
7.644  
7.489  
7.475  
7.354  
7.341  
7.328  
6.990  
6.979  
6.968

5.678  
5.667

3.425  
3.407  
3.394  
3.389  
3.375  
3.246

1.820  
1.526  
1.474  
1.456  
1.176  
1.155  
1.001  
0.989  
0.574  
0.555  
0.536

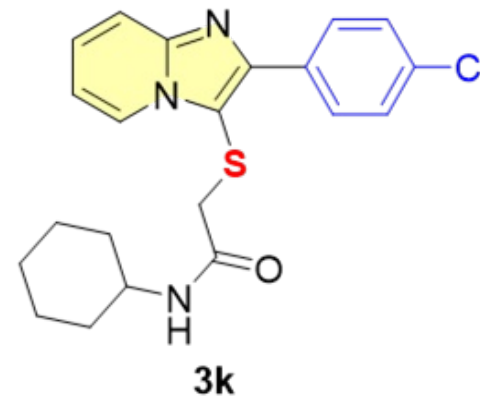

<sup>1</sup>H NMR (CDCl<sub>3</sub>, 600 MHz)

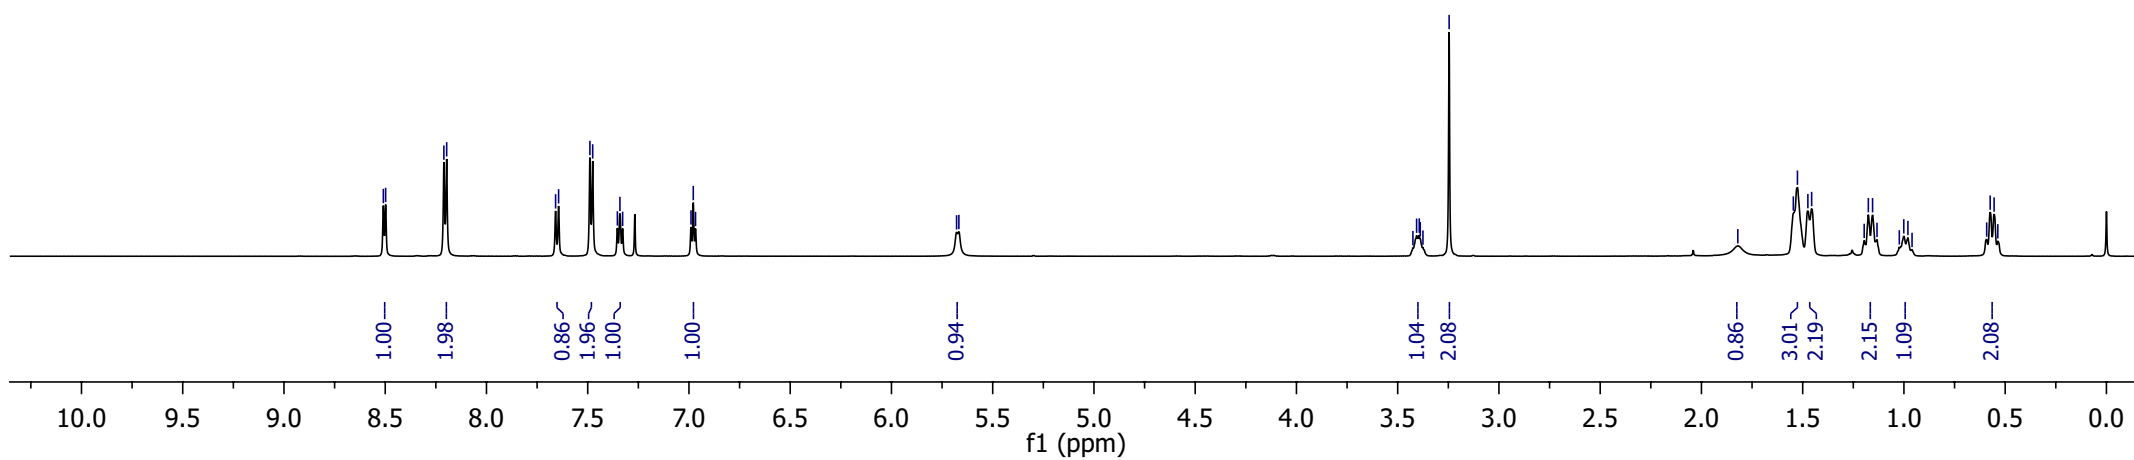

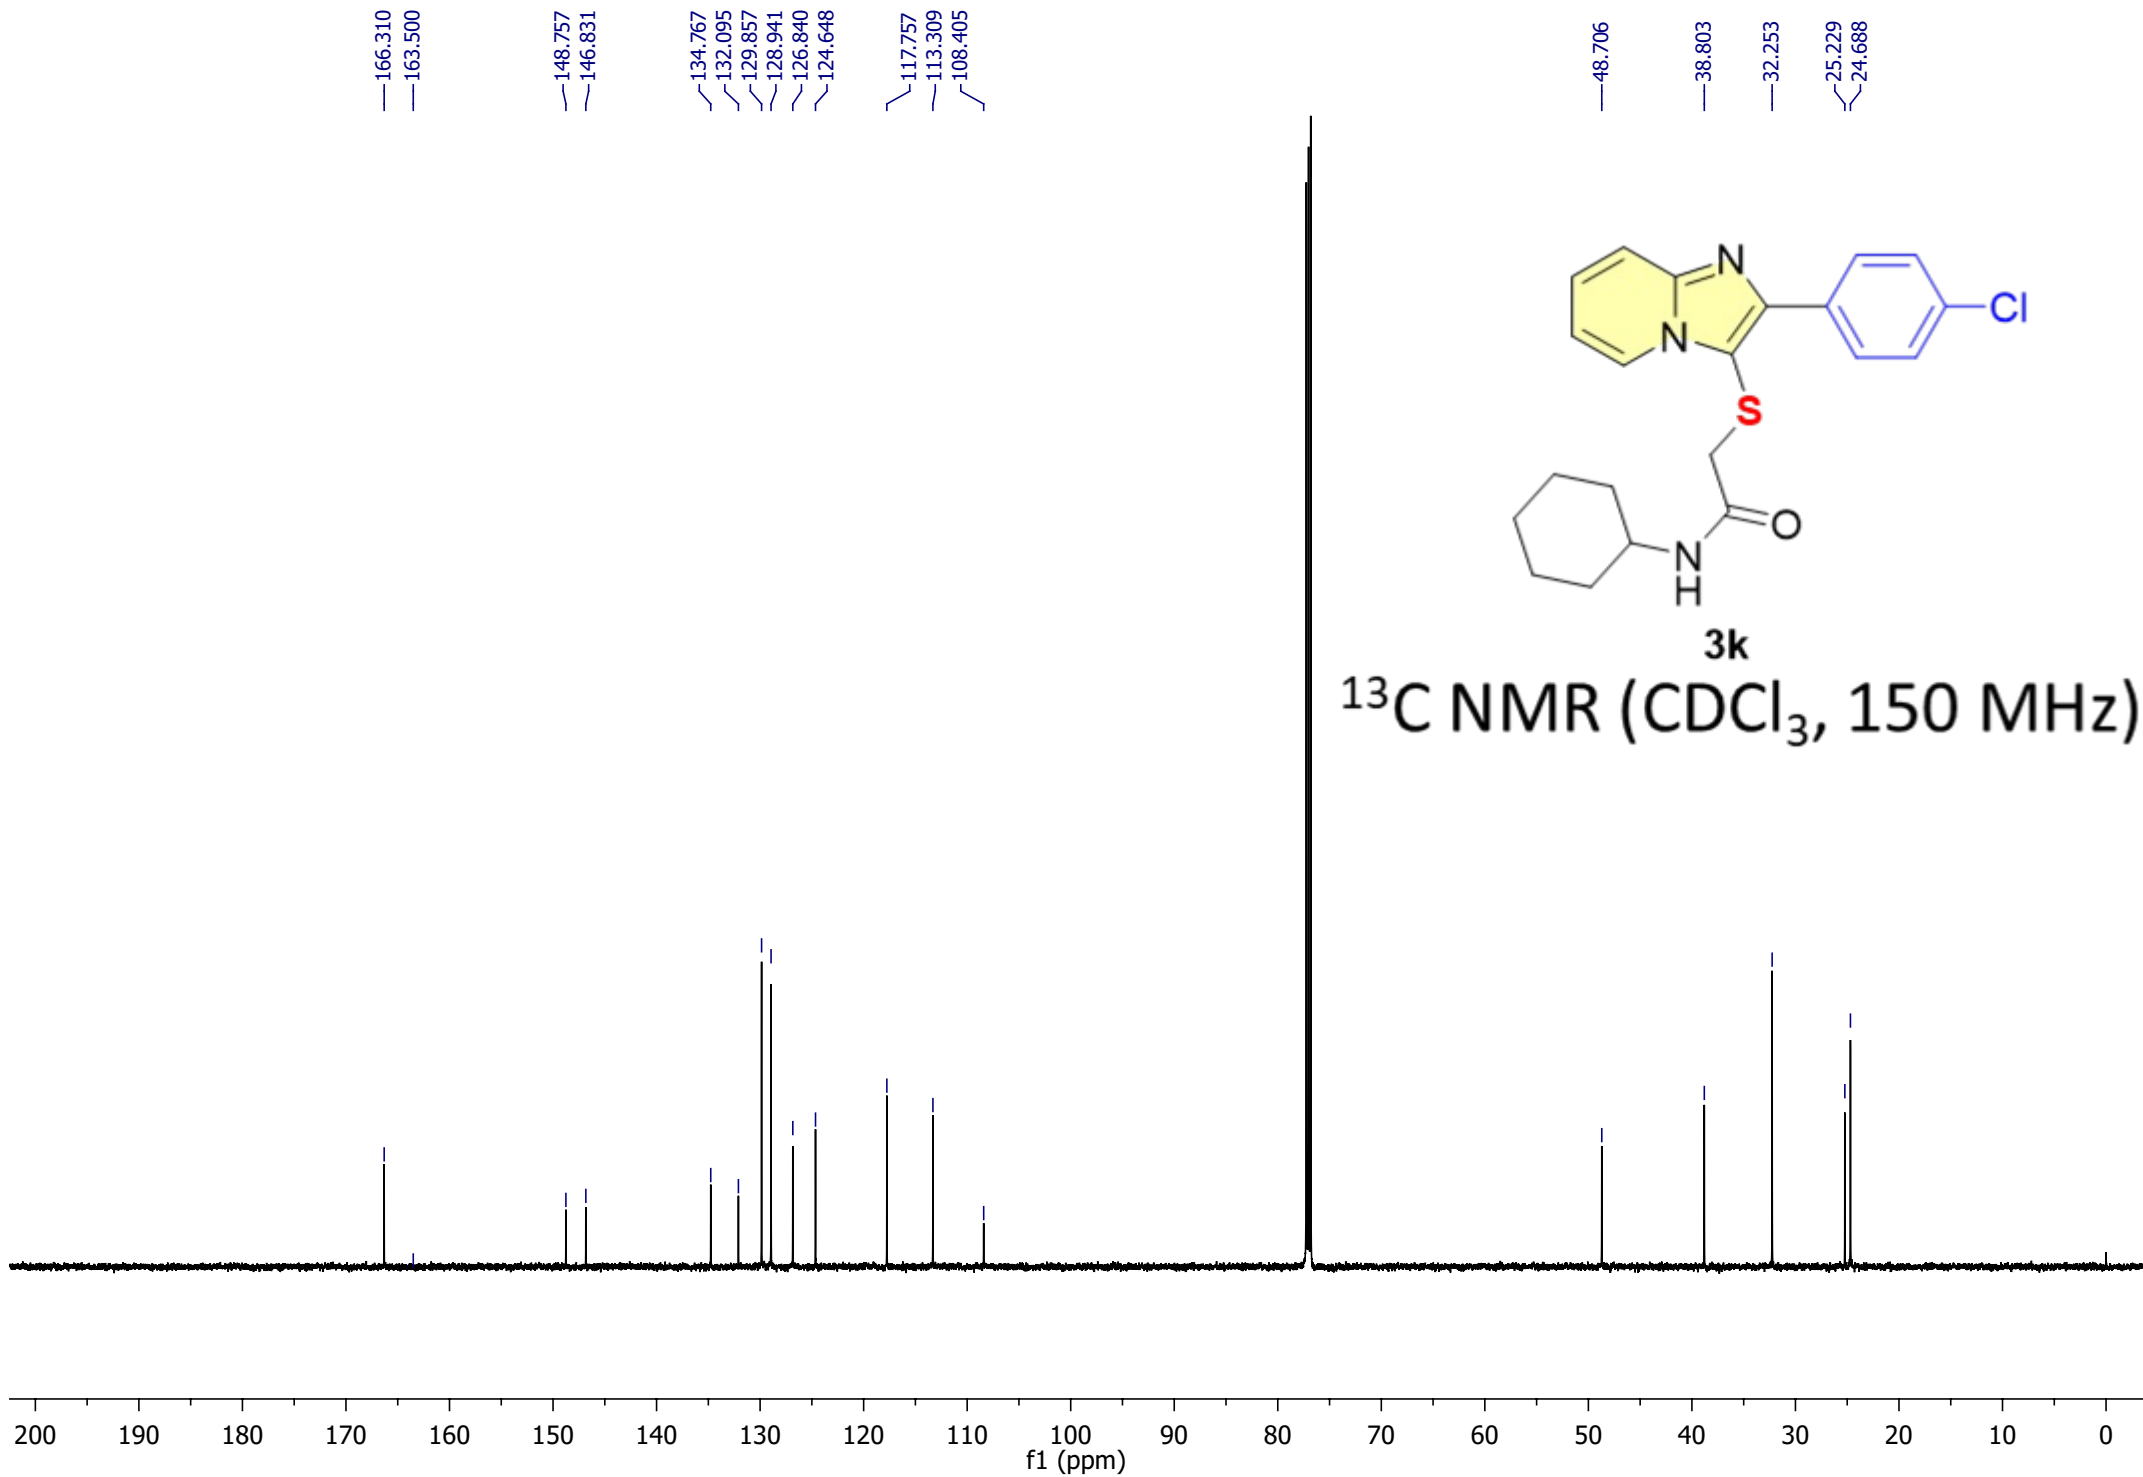

8.664  
8.438  
8.427  
8.319  
8.305  
7.920  
7.906  
7.622  
7.607  
7.498  
7.492  
7.484  
7.269  
6.882  
6.871

6.076  
6.063

3.297  
3.279  
3.272  
3.266  
3.248  
3.157

1.328  
1.300  
1.280

0.985  
0.965

0.588  
0.598  
0.259  
0.241  
0.221

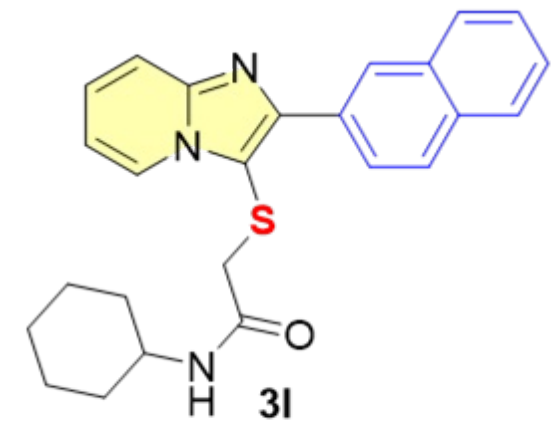

<sup>1</sup>H NMR (CDCl<sub>3</sub>, 600 MHz)

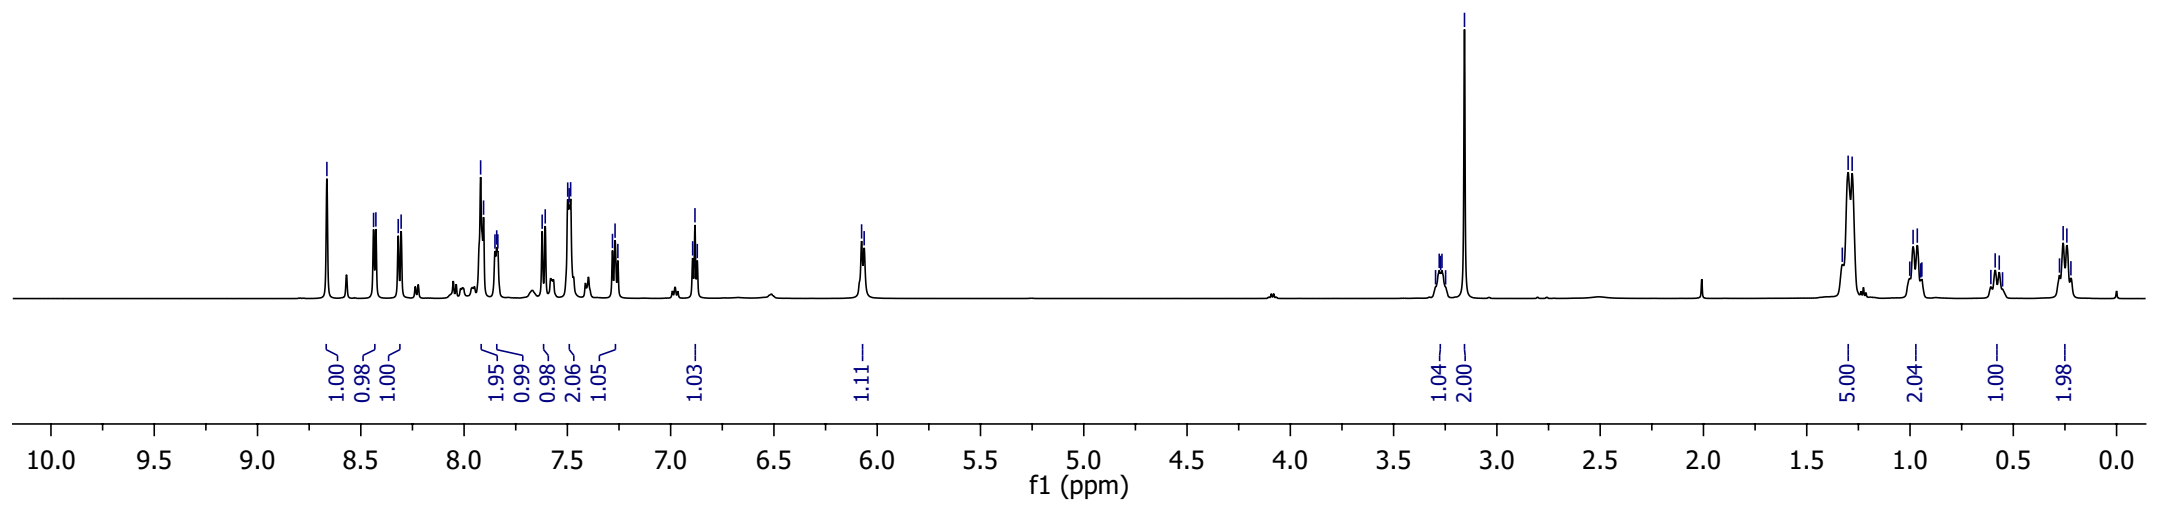

—166.49

—149.68

—146.79

133.33

130.95

128.54

128.25

127.91

127.62

126.62

126.59

126.38

126.11

117.56

—113.07

—108.73

—48.53

—38.69

—31.96

24.98

24.59

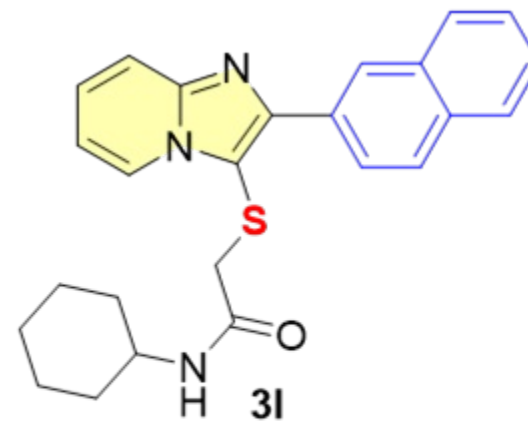

$^{13}\text{C}$  NMR ( $\text{CDCl}_3$ , 150 MHz)

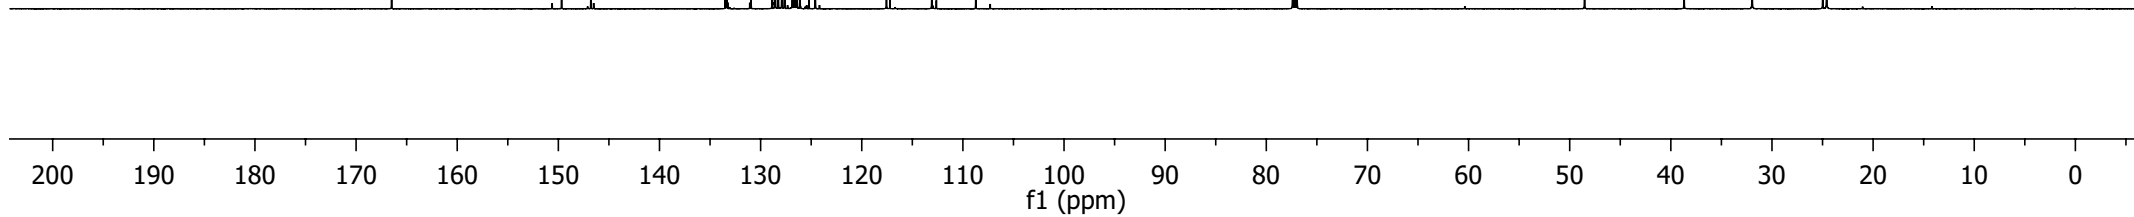

8.497  
8.495  
8.493  
8.484  
8.482  
8.480  
8.049  
8.044  
7.634  
7.616  
7.444  
7.442  
7.434  
7.431  
7.338  
7.336  
7.325  
7.322  
7.320  
7.318  
7.307  
7.304  
7.201  
7.194  
7.191  
7.184  
6.969  
6.967  
6.956  
6.954  
6.942  
6.940

3.486  
3.477  
3.469  
3.462  
3.455  
3.447  
3.439  
3.432  
3.425  
3.417  
3.410  
3.335

1.549  
1.542  
1.523  
1.504  
1.497  
1.472  
1.209  
1.184  
1.178  
1.164  
1.158  
1.140  
1.133  
0.983  
0.965  
0.959  
0.696  
0.692  
0.673  
0.669  
0.650  
0.645  
0.627  
0.620

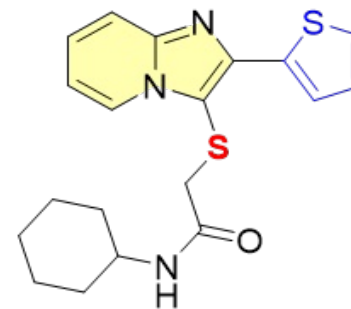

3m

<sup>1</sup>H NMR (CDCl<sub>3</sub>, 500 MHz)

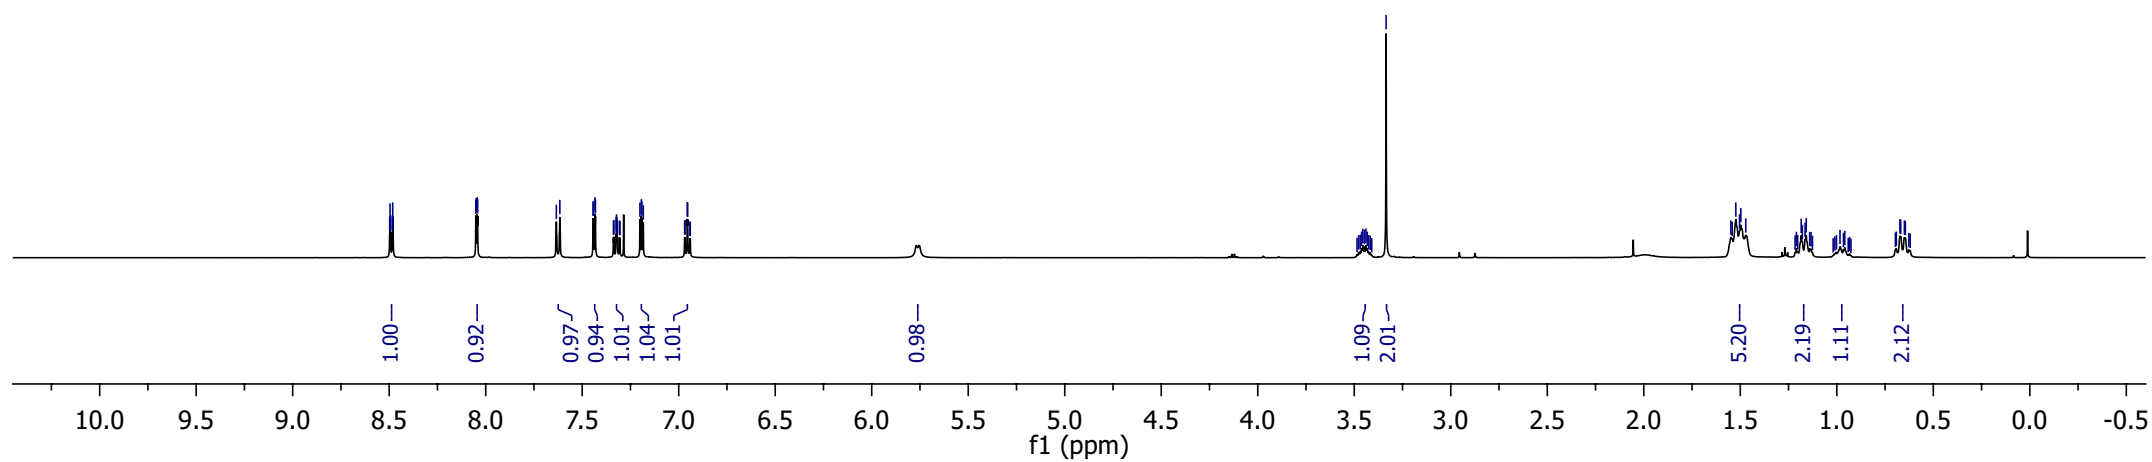

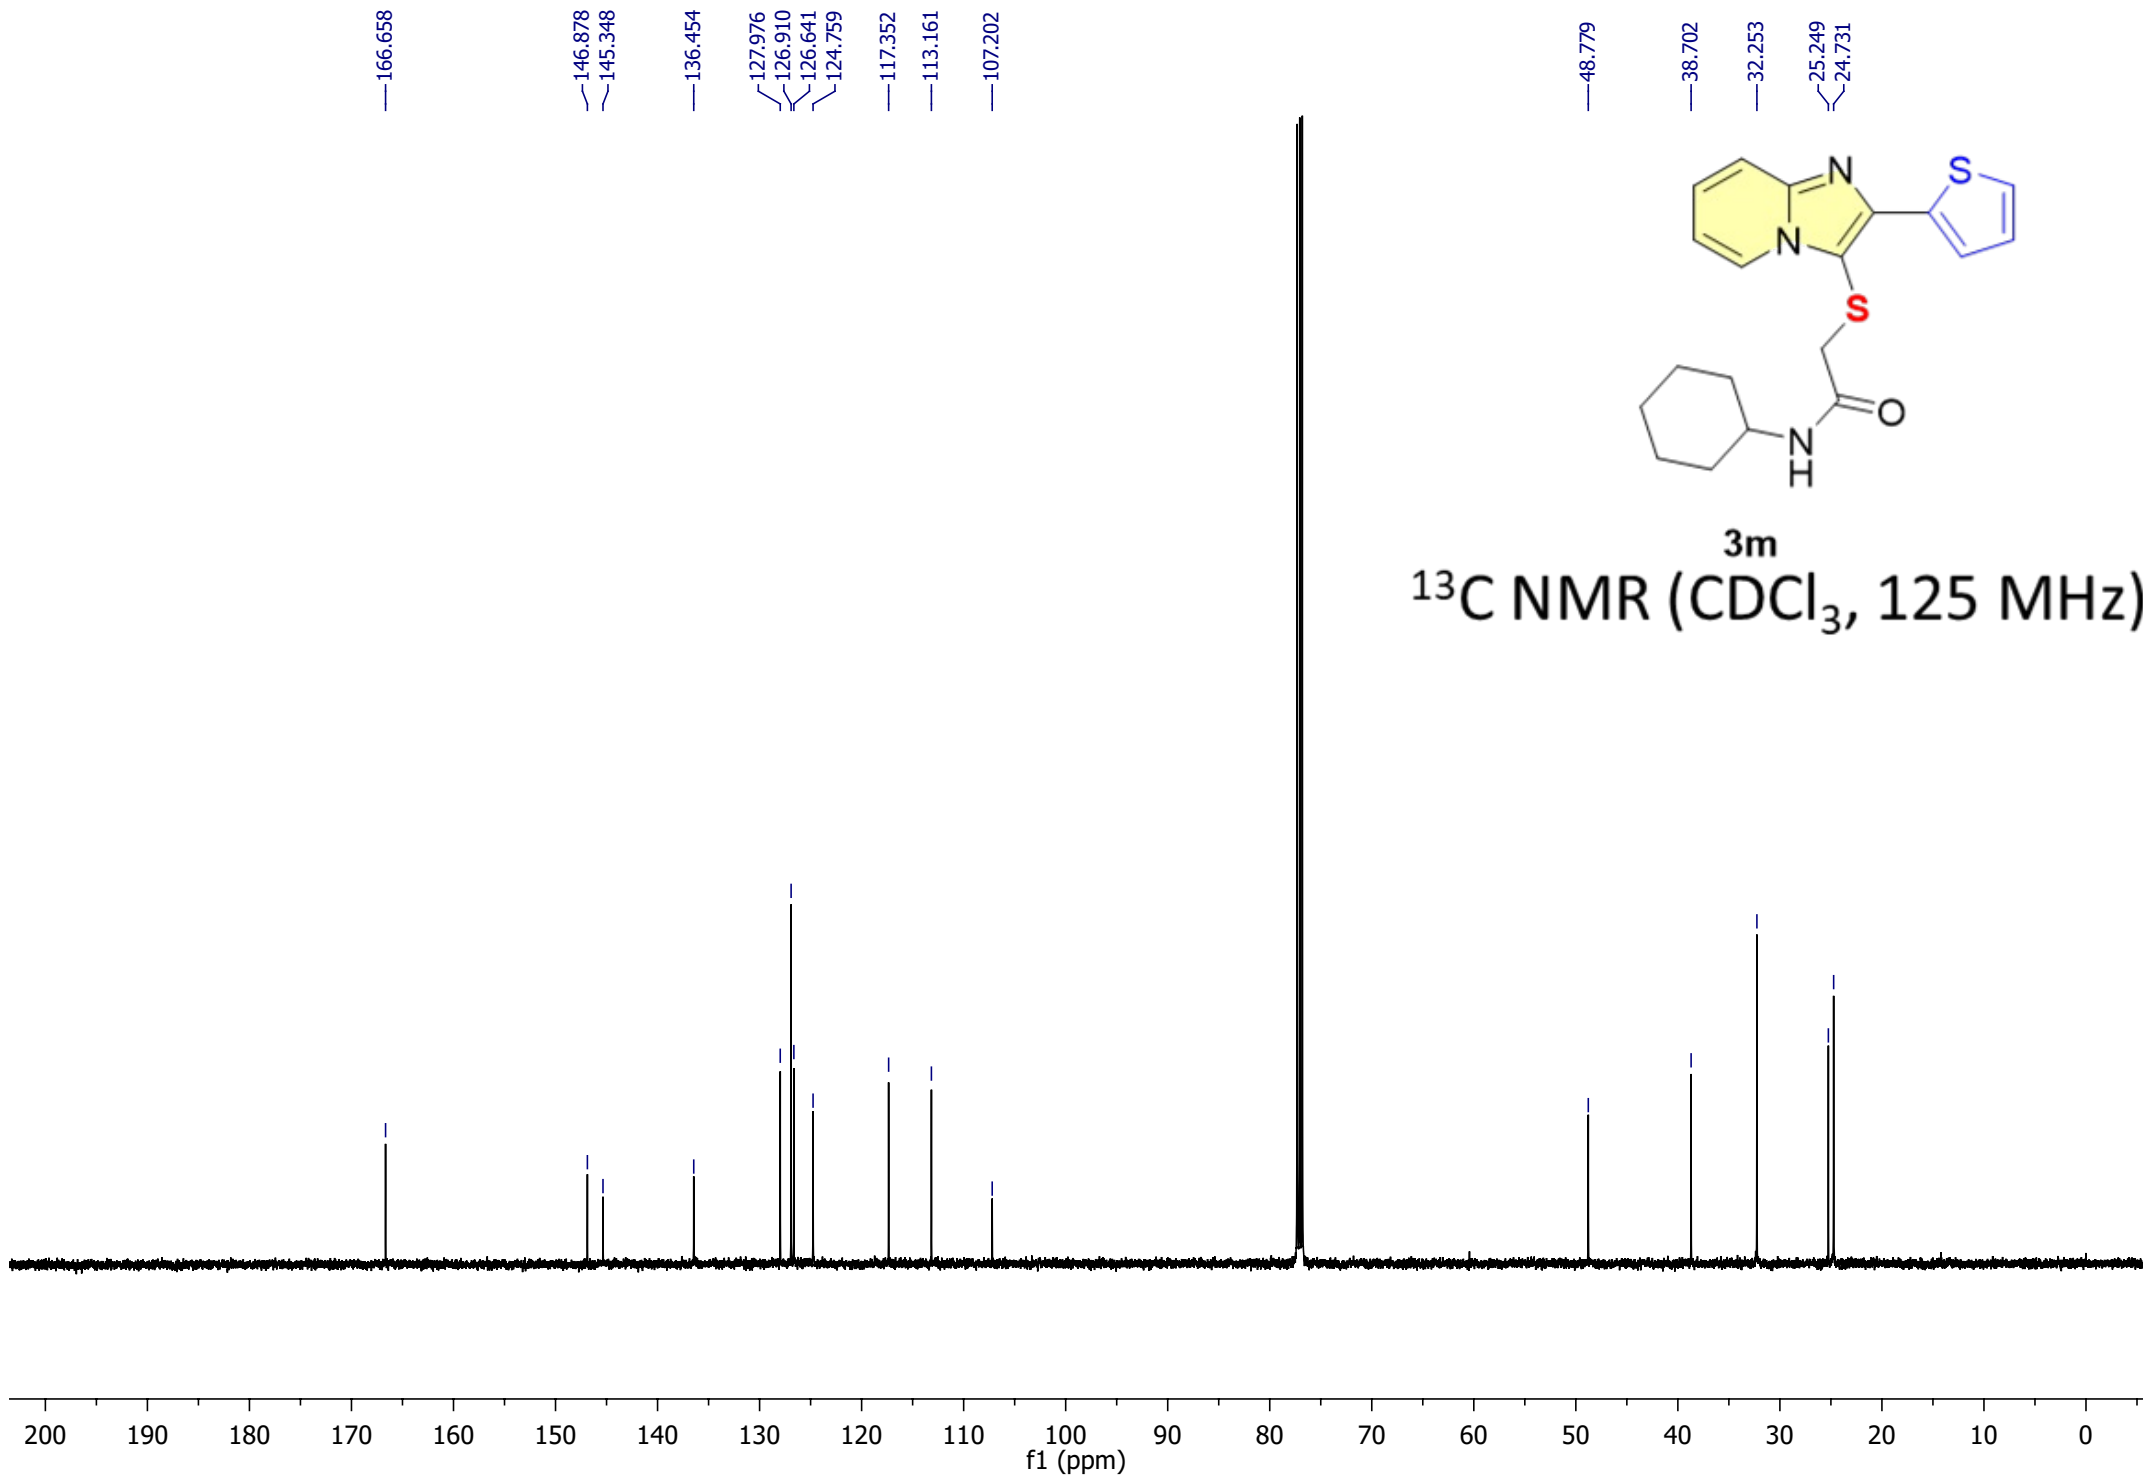

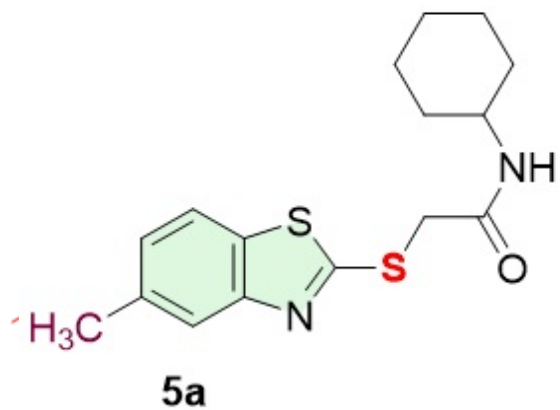

8.21  
8.20  
7.81  
7.71  
7.69  
7.30  
7.28

4.09  
3.54

2.41  
1.74  
1.72  
1.69  
1.68  
1.66  
1.65  
1.55  
1.53  
1.52  
1.30  
1.27  
1.25  
1.22  
1.19  
1.17  
1.15  
1.13

<sup>1</sup>H NMR (DMSO-*d*<sub>6</sub>, 500 MHz)

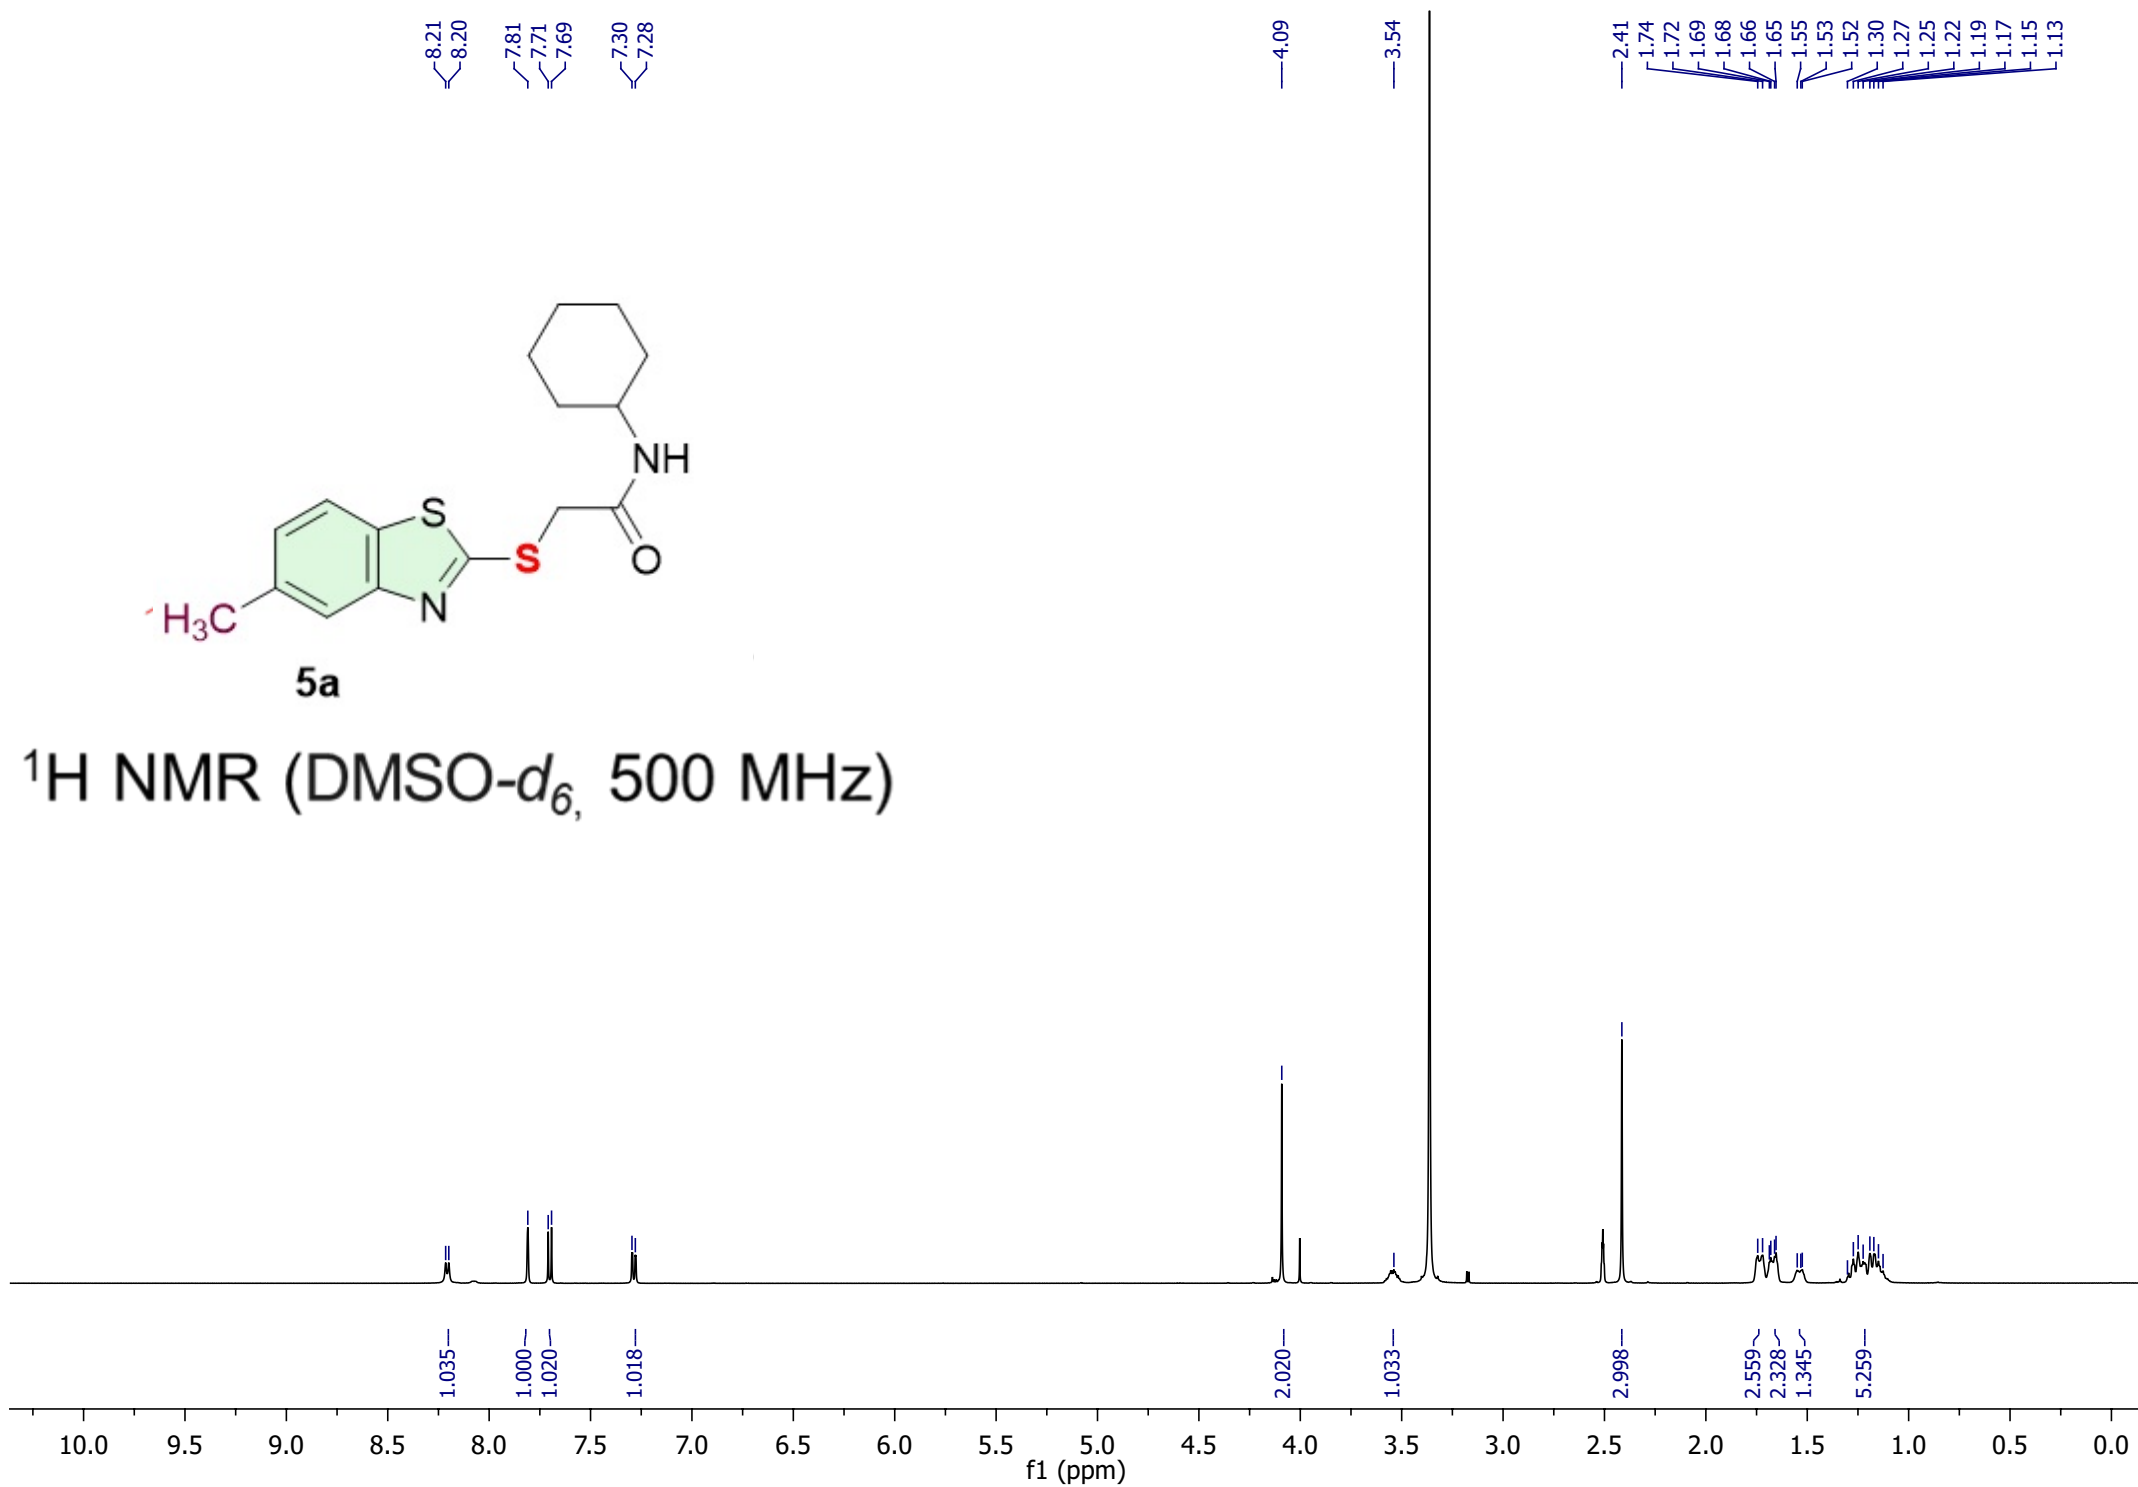

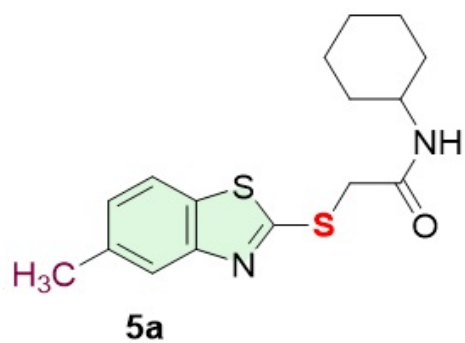

165.68  
165.36

151.19

135.33  
134.61

128.18

121.90  
121.05

48.45

37.30

32.66

25.62  
24.82

21.40

$^{13}\text{C}$  NMR (DMSO- $d_6$ , 125 MHz)

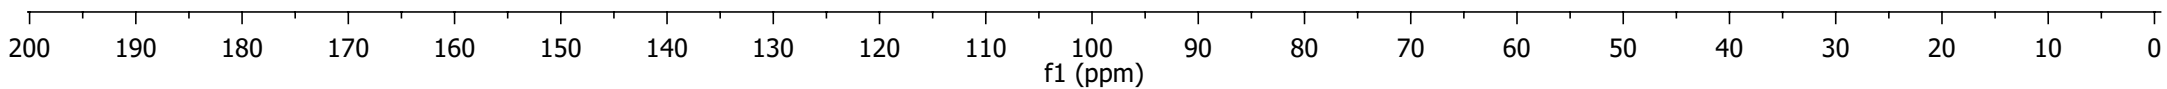

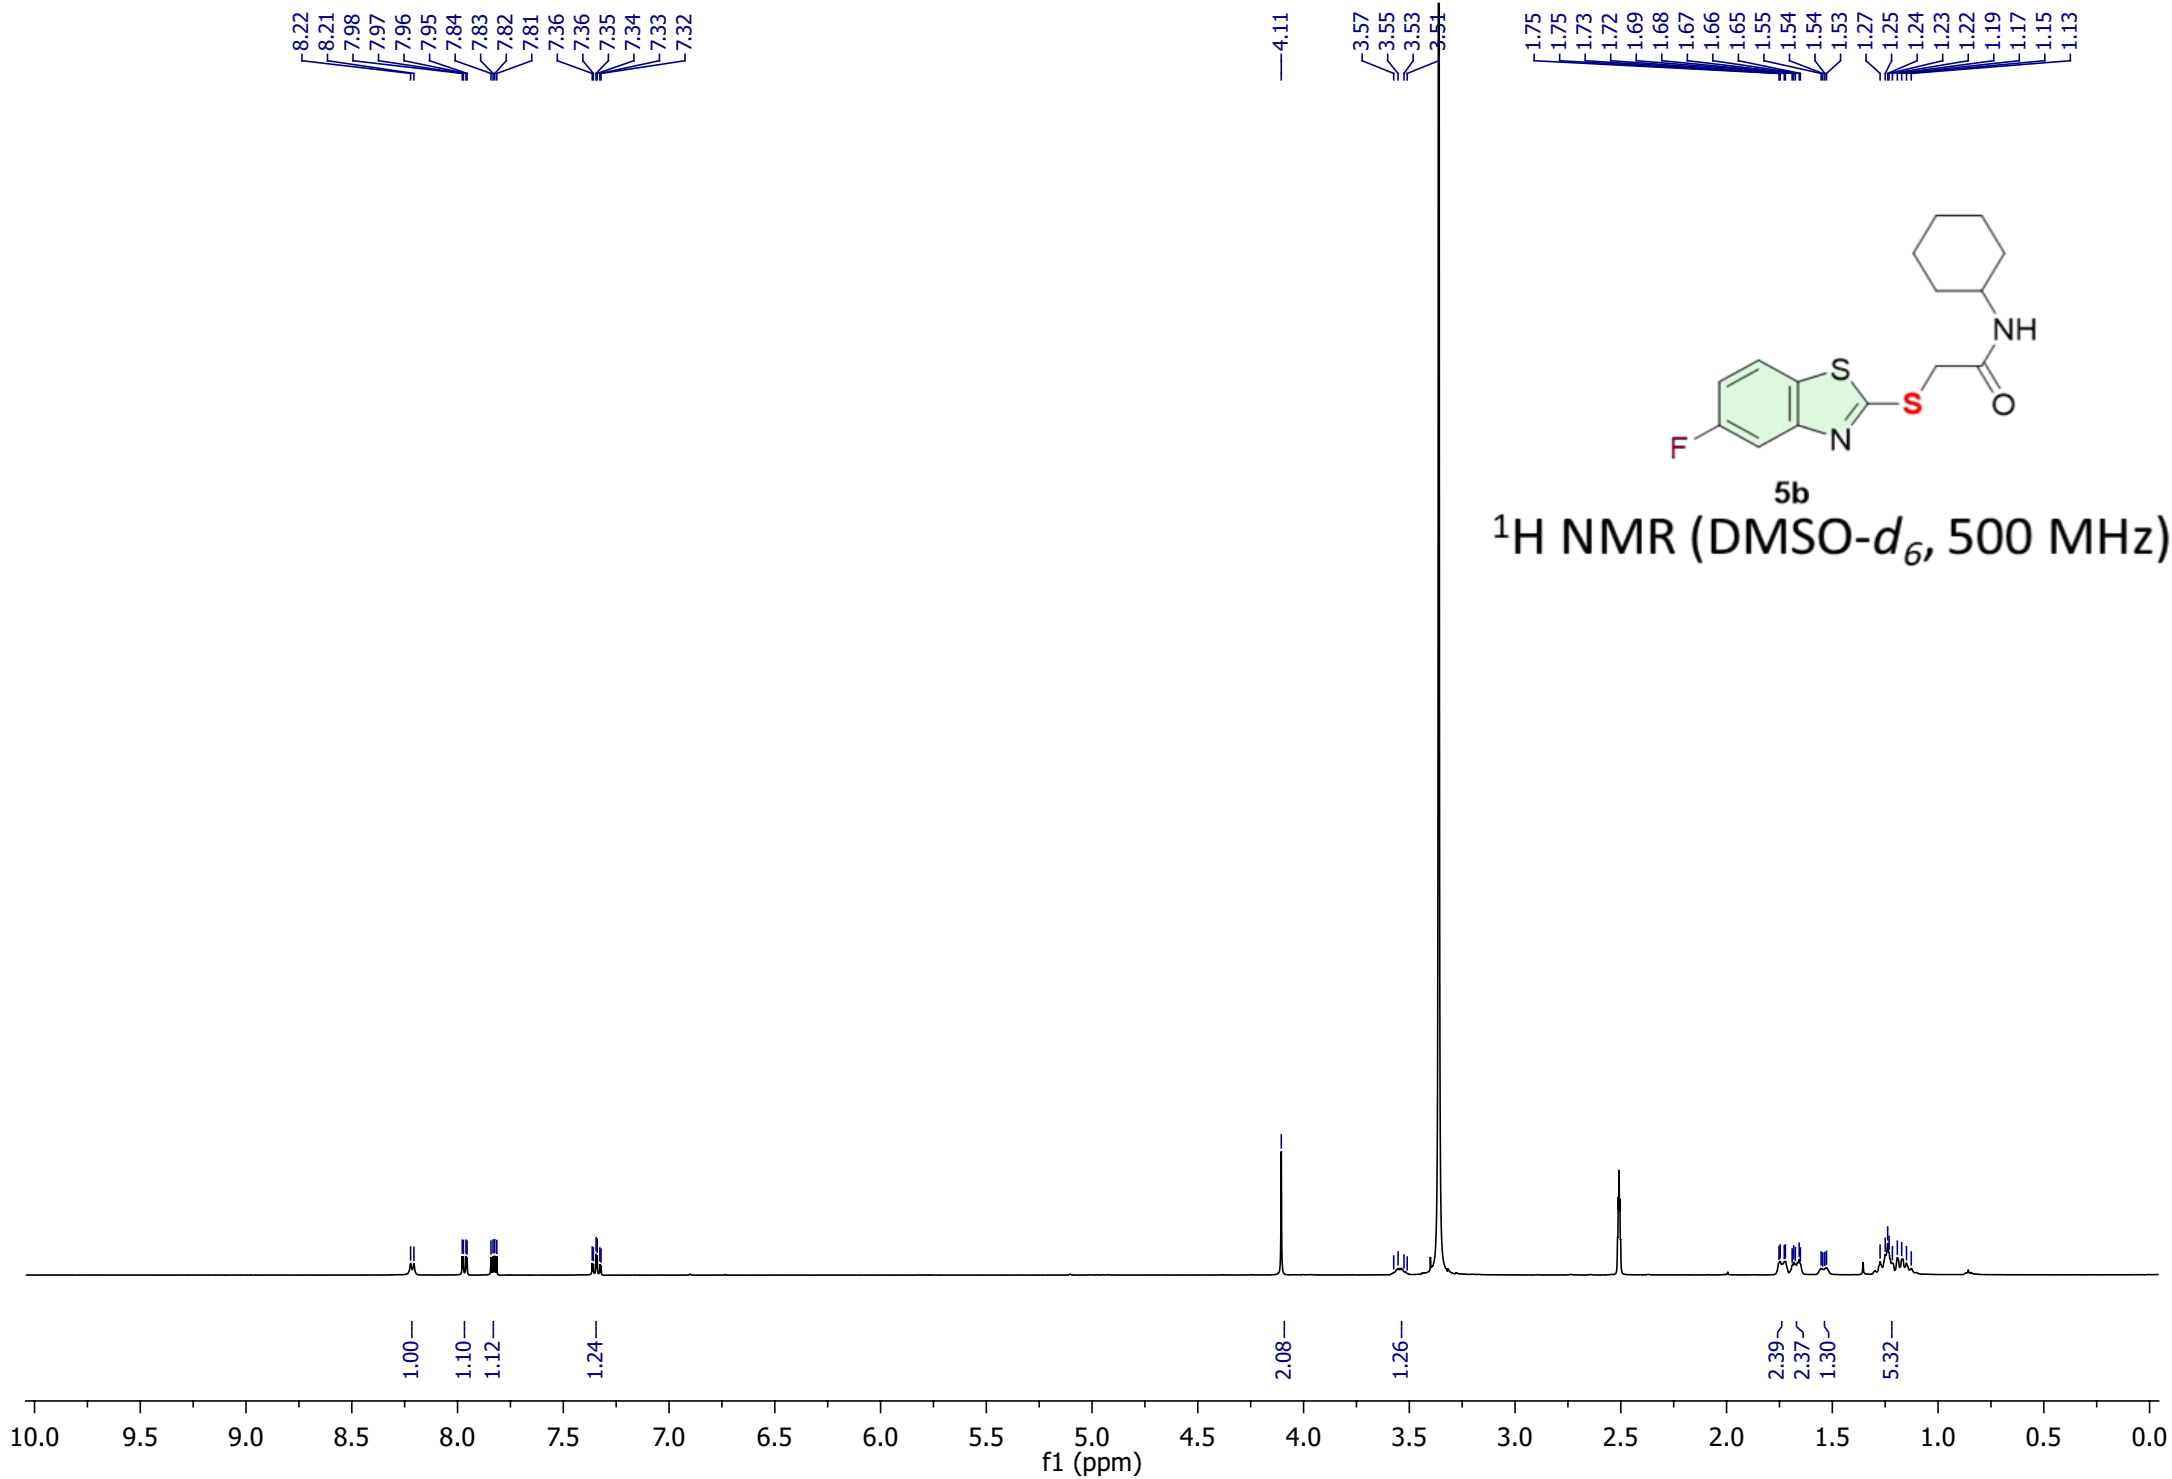

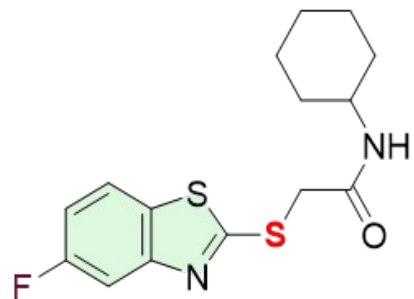

5b

$^{13}\text{C}$  NMR (DMSO- $d_6$ , 125 MHz)

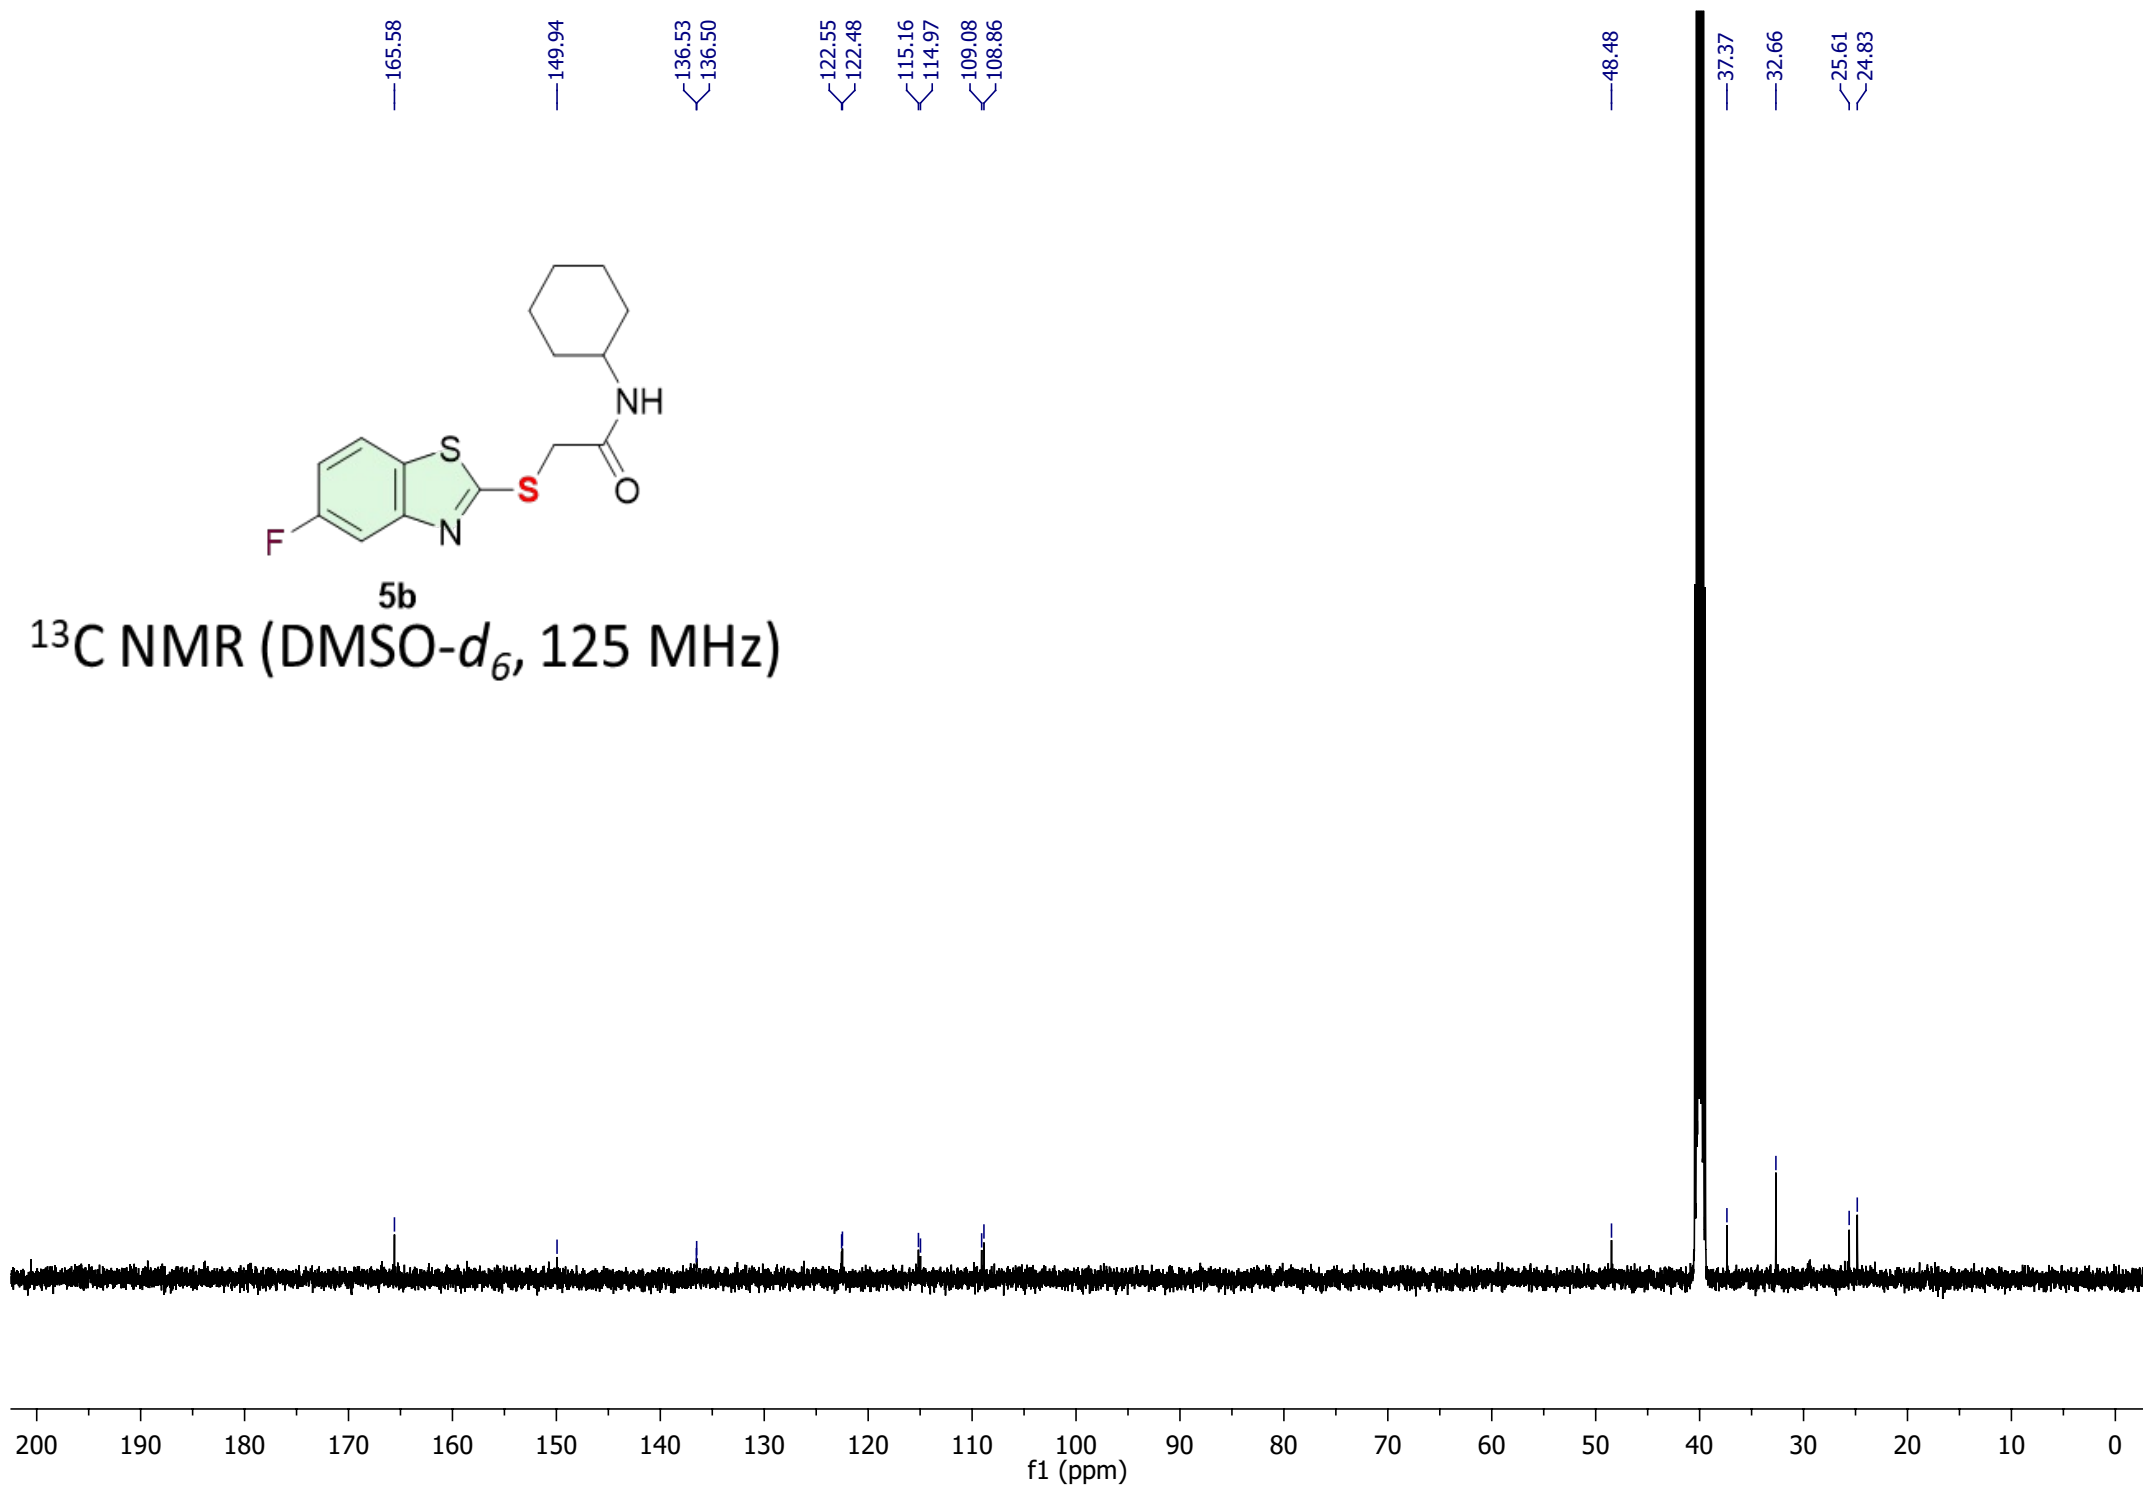

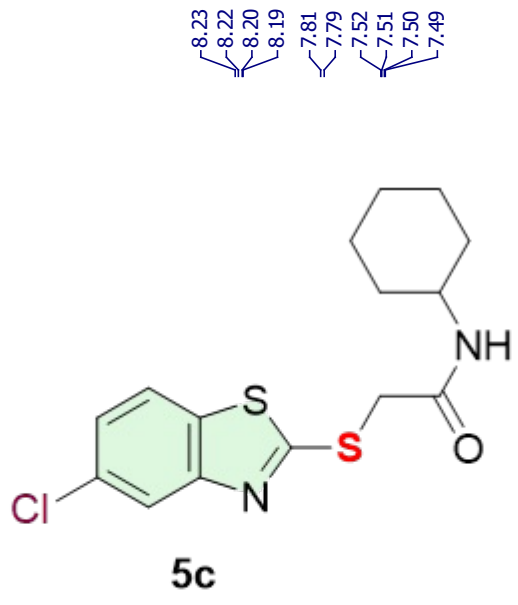

<sup>1</sup>H NMR (DMSO-*d*<sub>6</sub>, 500 MHz)

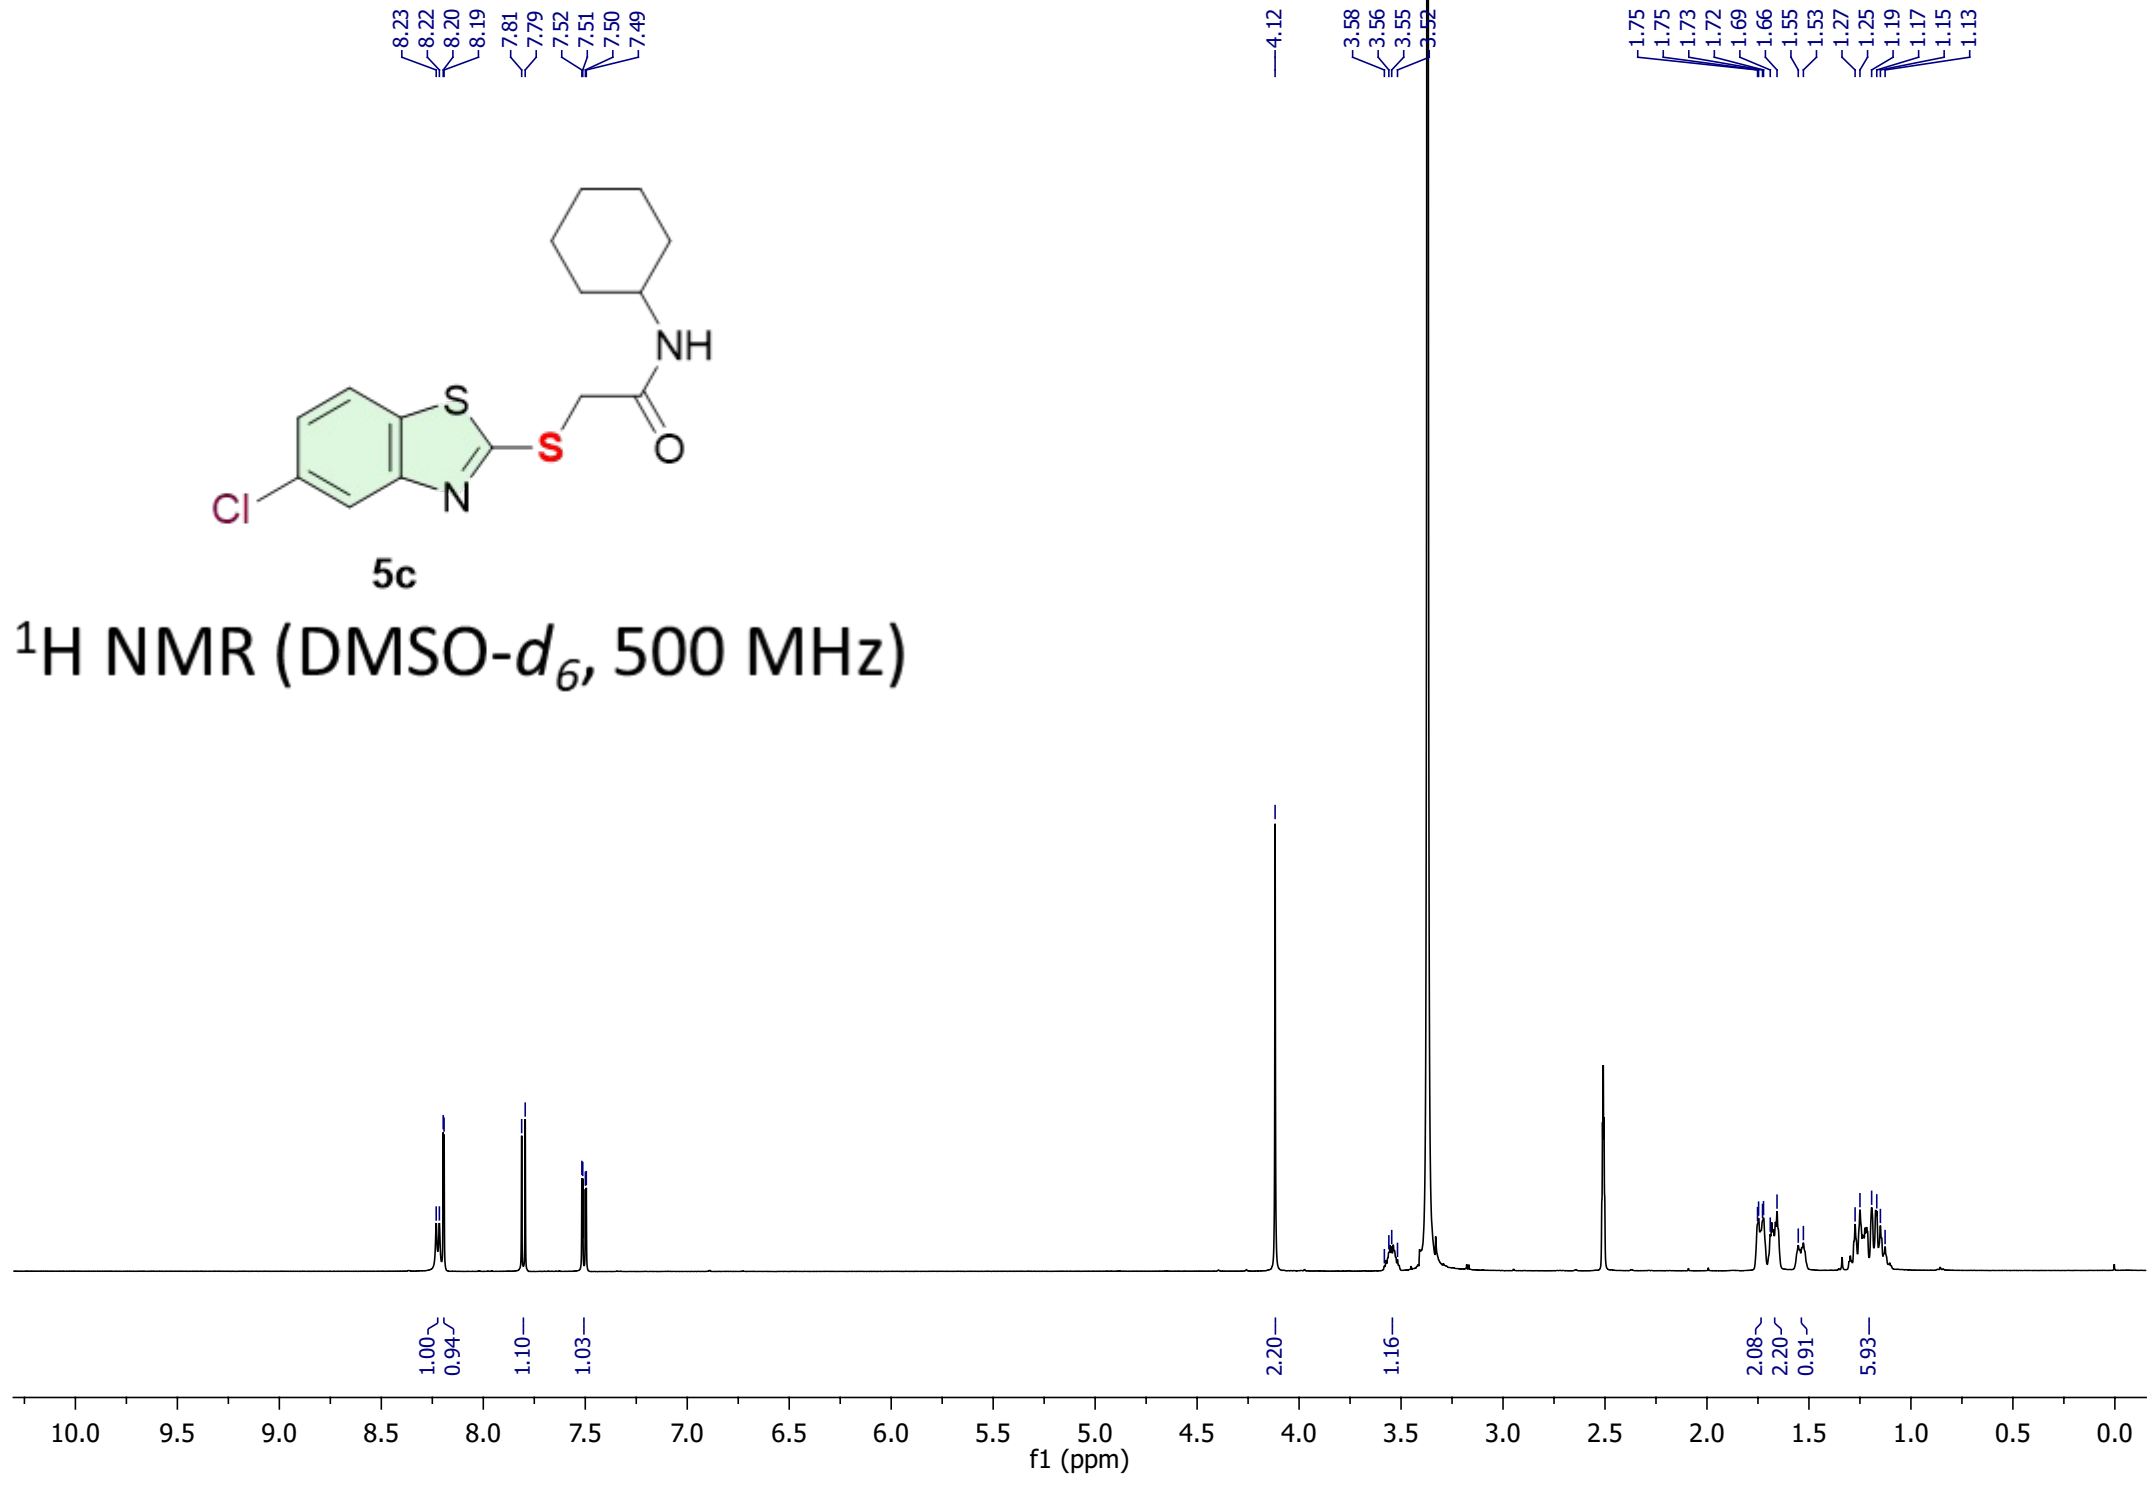

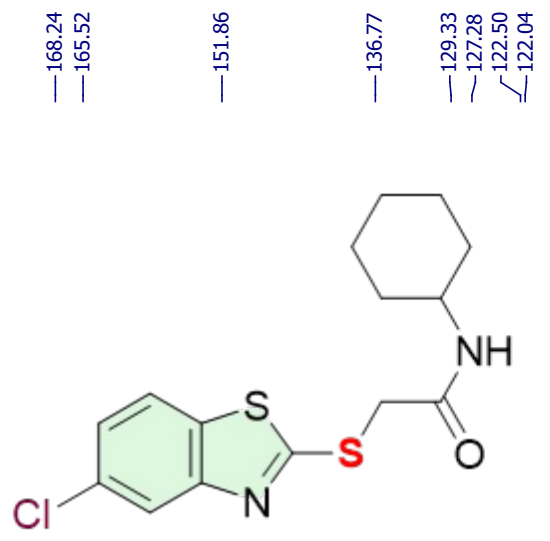

5c

$^{13}\text{C}$  NMR (DMSO- $d_6$ , 125 MHz)

- 168.24
- 165.52
- 151.86
- 136.77
- 129.33
- 127.28
- 122.50
- 122.04
- 48.50
- 37.38
- 32.66
- 25.61
- 24.83

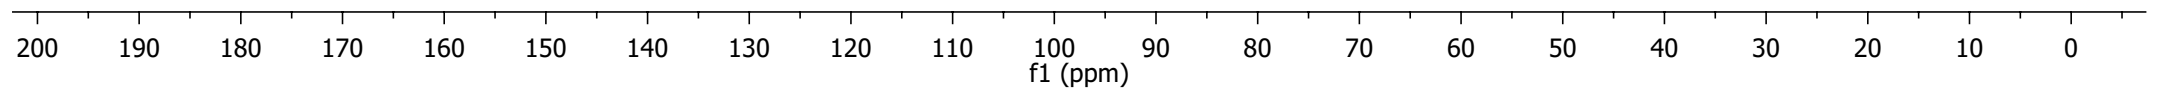

8.323  
8.319  
8.235  
8.219  
7.751  
7.734  
7.632  
7.628  
7.615  
7.611

4.112  
3.571  
3.562  
3.556  
3.550  
3.542  
3.534  
3.529  
3.522  
3.514  
3.508

1.749  
1.743  
1.733  
1.724  
1.719  
1.687  
1.680  
1.672  
1.662  
1.654  
1.647  
1.247  
1.222  
1.215  
1.190  
1.170  
1.165  
1.147  
1.124

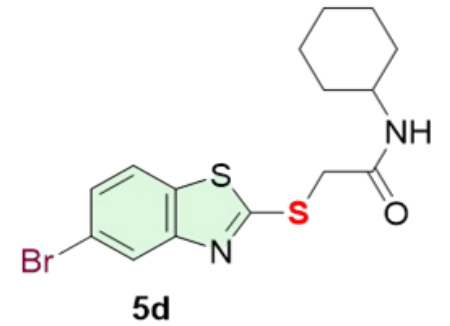

<sup>1</sup>H NMR (DMSO-*d*<sub>6</sub>, 500 MHz)

0.99

1.07

1.00

1.05

1.69

0.90

1.67

1.53

0.93

4.64

10.0 9.5 9.0 8.5 8.0 7.5 7.0 6.5 6.0 5.5 5.0 4.5 4.0 3.5 3.0 2.5 2.0 1.5 1.0 0.5 0.0

f1 (ppm)

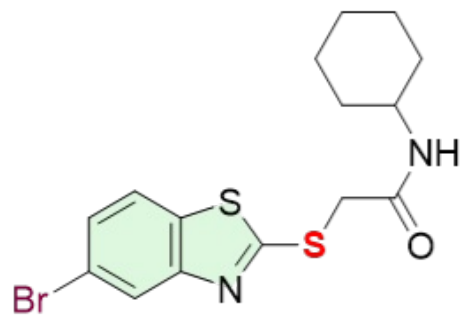

5d

$^{13}\text{C}$  NMR (DMSO- $d_6$ , 125 MHz)

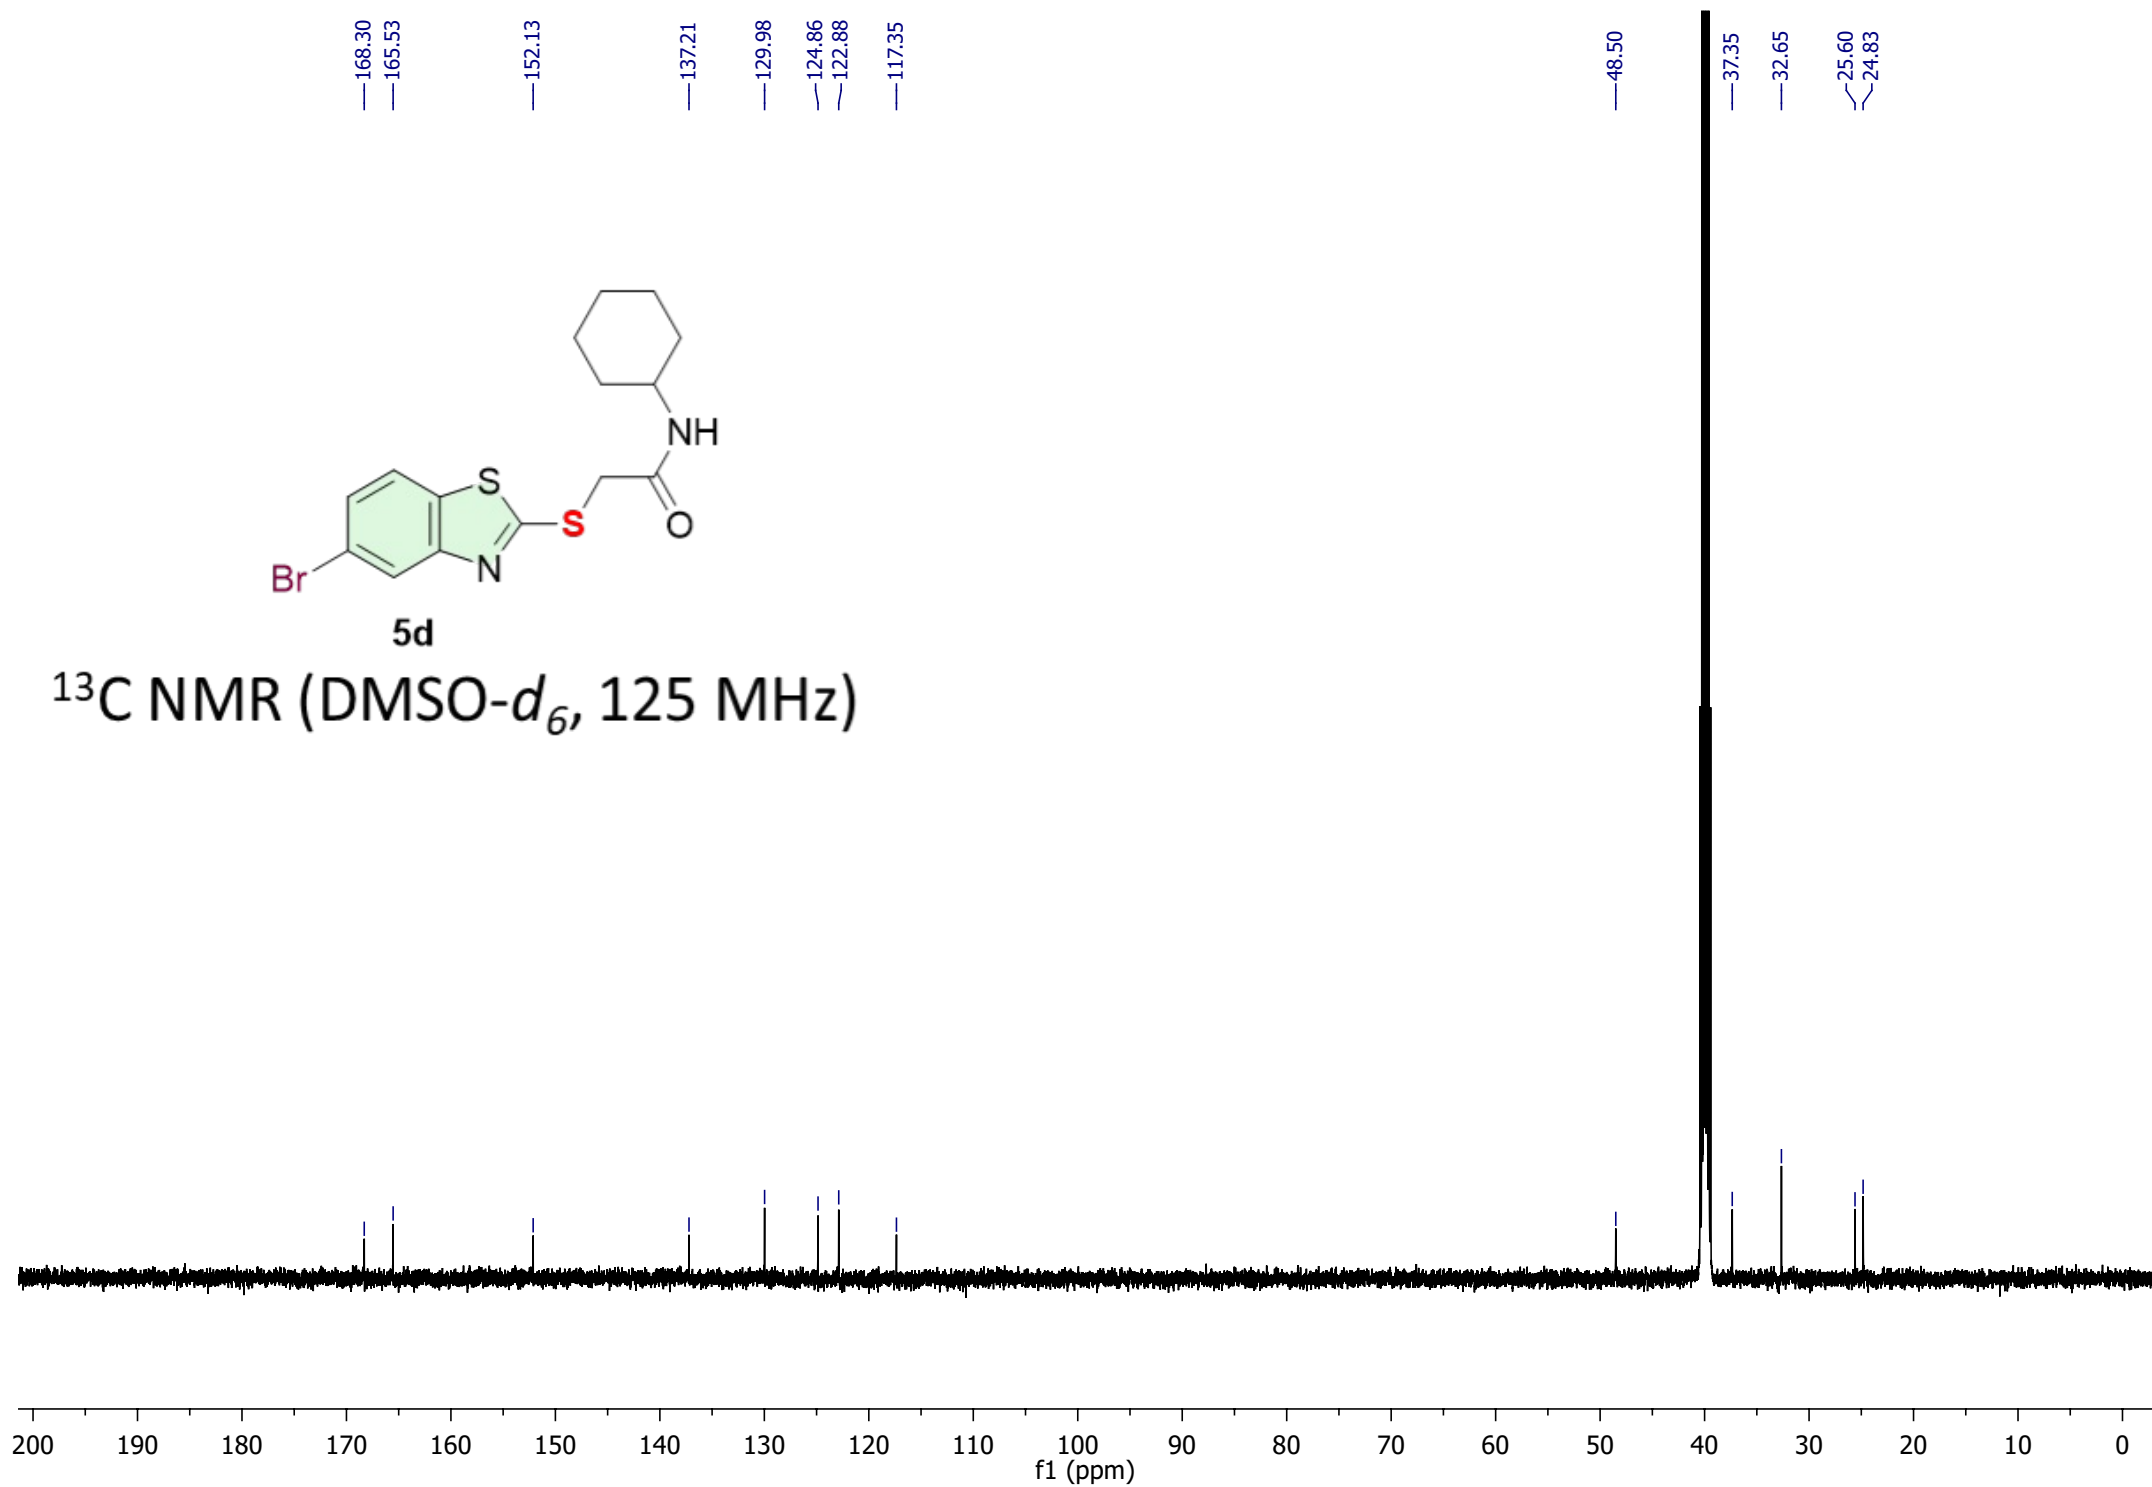

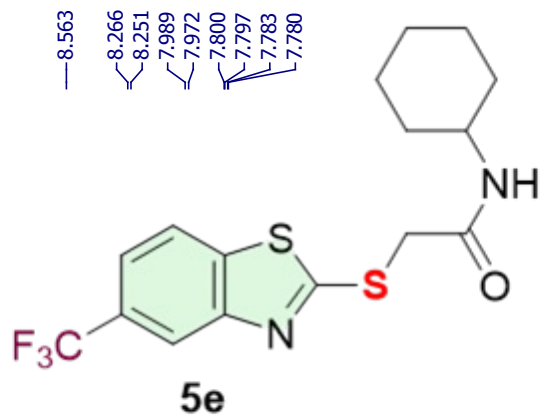

$^1\text{H}$  NMR (DMSO- $d_6$ , 500 MHz)

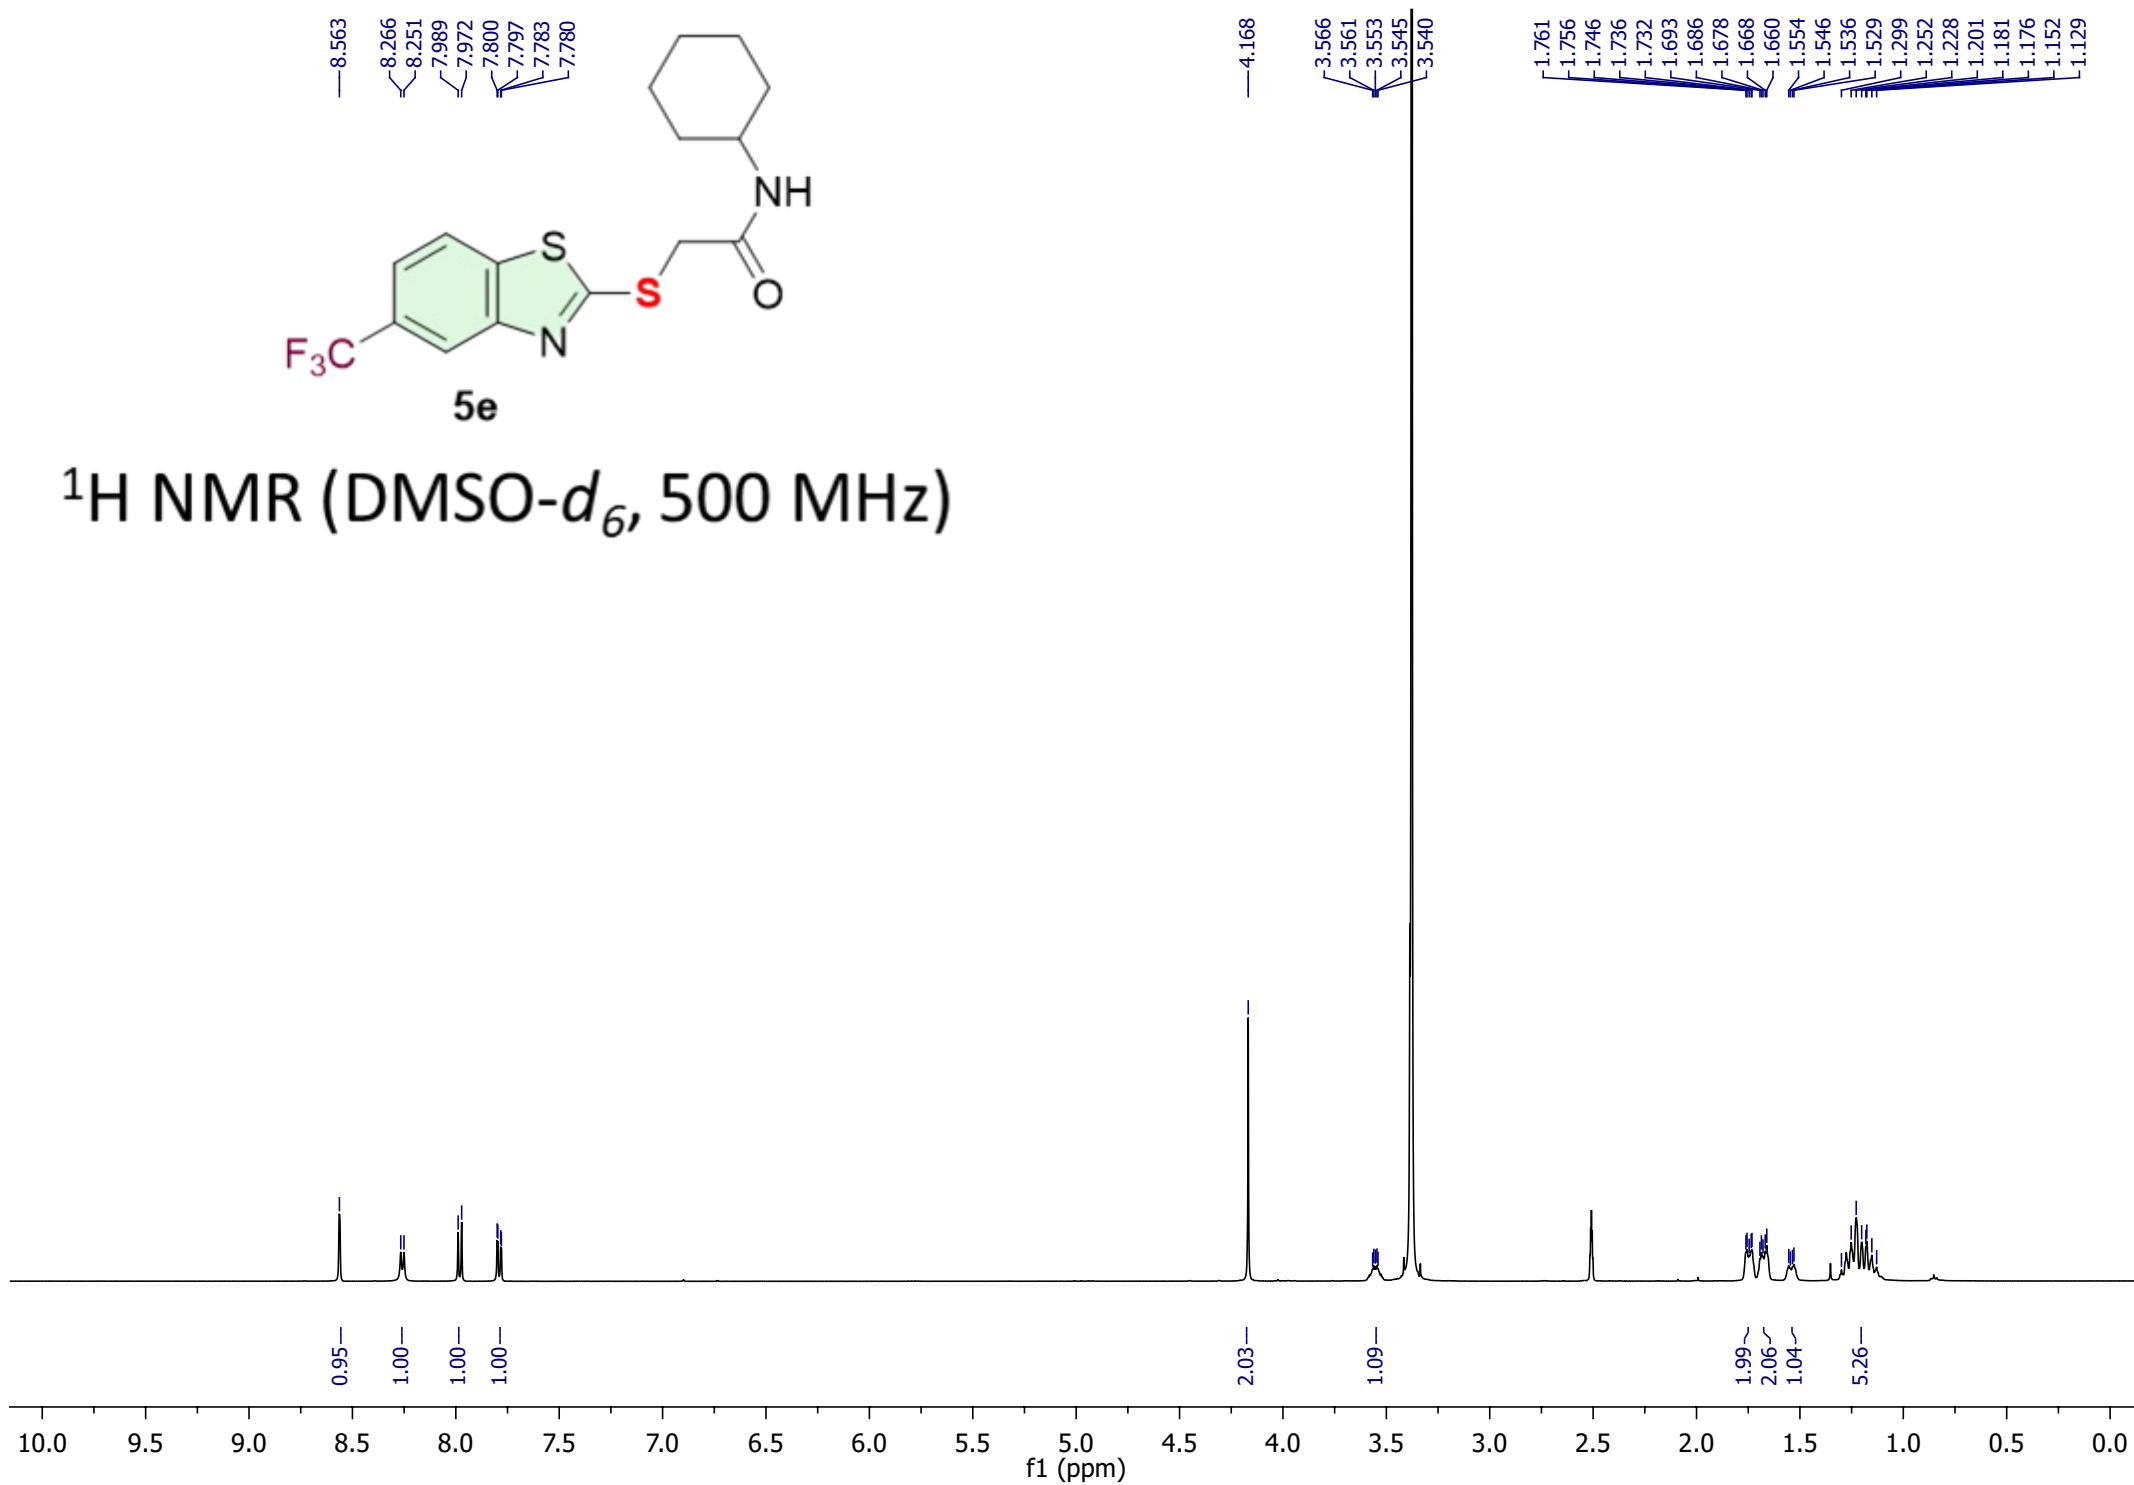

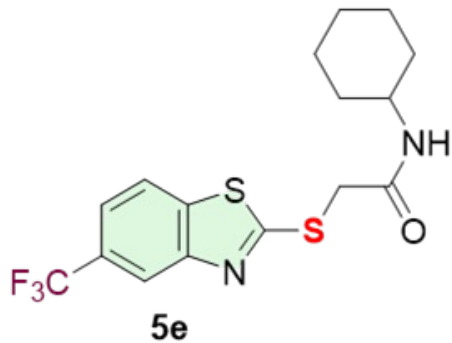

$^{13}\text{C}$  NMR (DMSO- $d_6$ , 125 MHz)

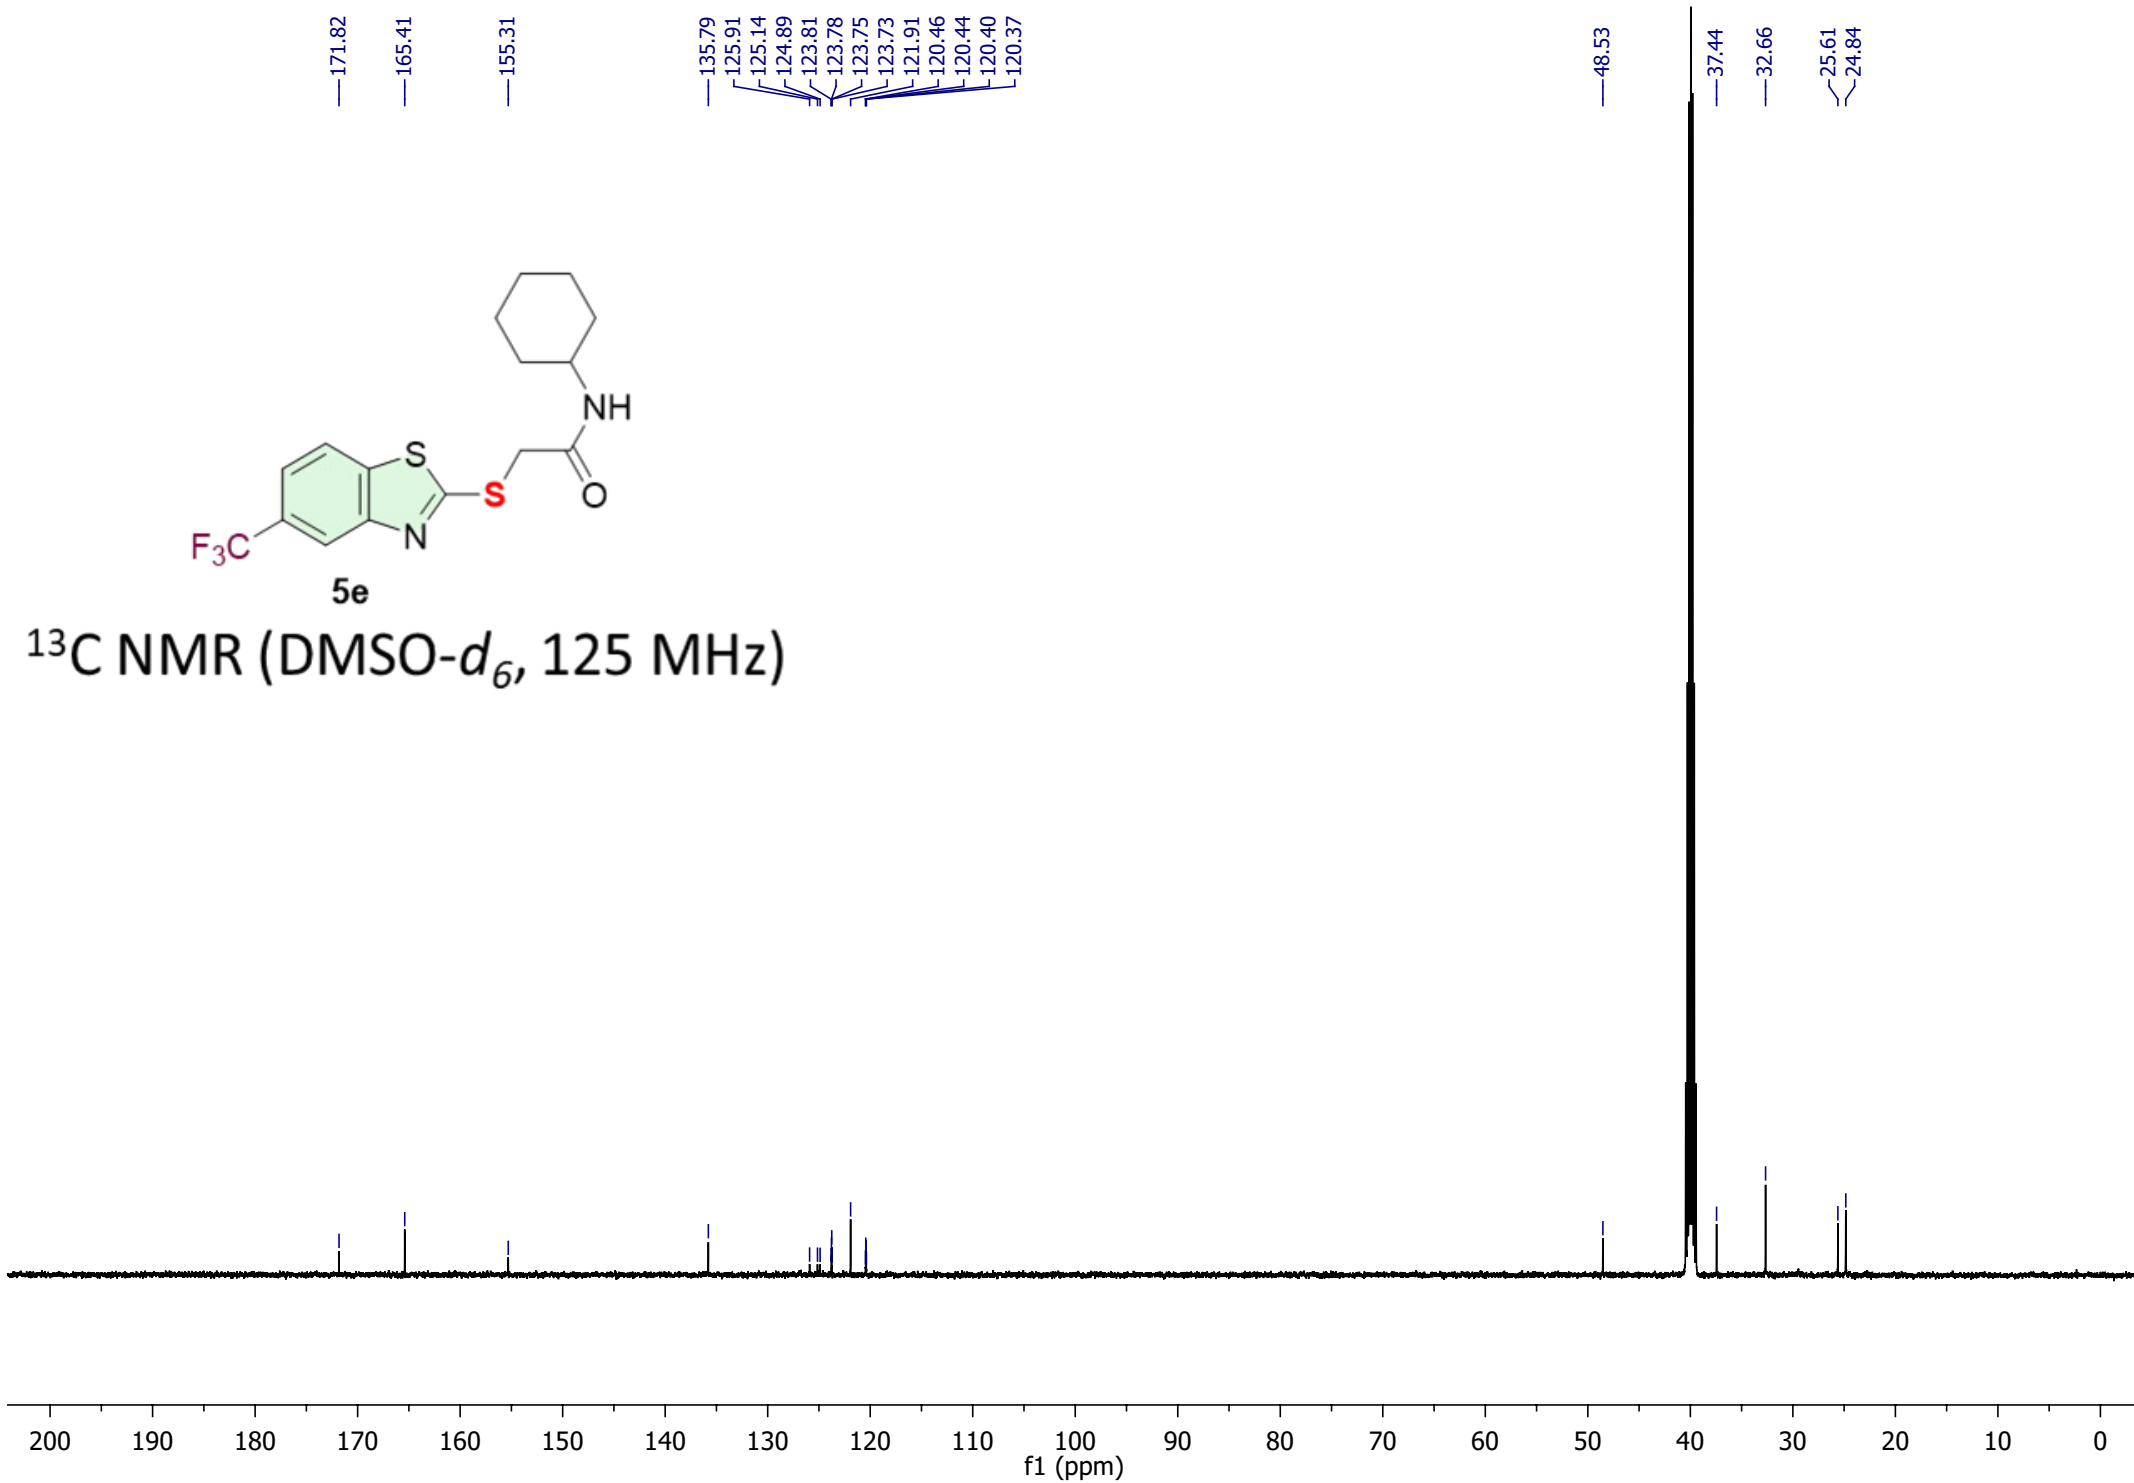

9.110  
9.106  
8.321  
8.316  
8.303  
8.298  
8.289  
8.274  
7.976  
7.959

4.196  
3.584  
3.569  
3.563  
3.556  
3.548  
3.543  
3.536  
3.527

1.761  
1.751  
1.737  
1.698  
1.691  
1.684  
1.673  
1.665  
1.559  
1.551  
1.534  
1.279  
1.256  
1.231  
1.206  
1.180  
1.157  
1.134

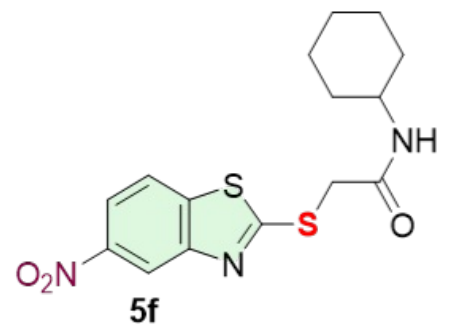

<sup>1</sup>H NMR (DMSO-d<sub>6</sub>, 500 MHz)

0.67

1.64

1.00

2.00

1.09

2.00

2.05

1.07

5.55

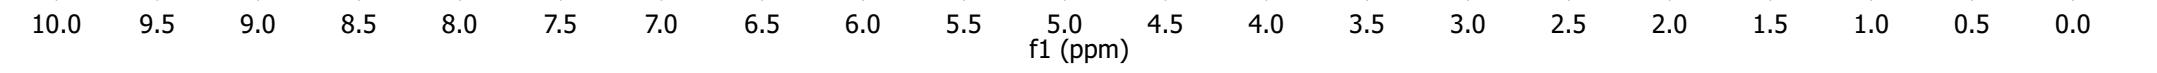

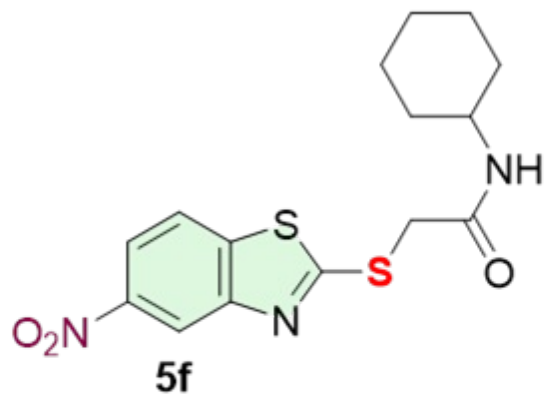

—175.04

—165.27

—156.93

—144.04

—135.97

—122.51

—121.51

—119.37

—48.56

—37.56

—32.67

—25.61

—24.84

$^{13}\text{C}$  NMR (DMSO- $d_6$ , 125 MHz)

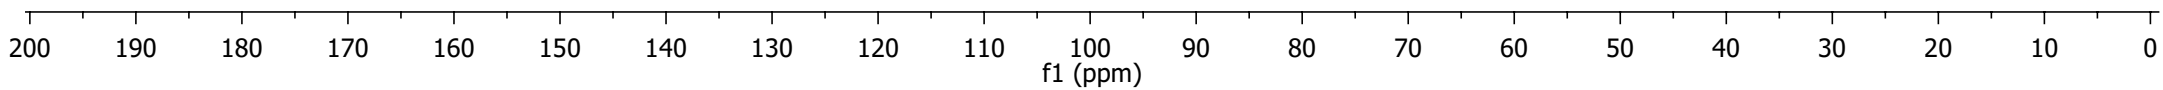

8.238  
8.224  
7.767  
7.764  
7.750  
7.623  
7.604  
7.523  
7.508  
6.867  
6.856  
6.855  
6.850  
6.849  
6.837  
6.836  
6.653  
6.651  
6.638  
6.626  
6.623

3.762  
3.754  
3.742  
3.734  
3.726  
3.718  
3.711  
3.707  
3.698  
3.691  
3.479

1.806  
1.800  
1.790  
1.782  
1.775  
1.650  
1.642  
1.634  
1.624  
1.615  
1.608  
1.534  
1.508  
1.295  
1.289  
1.280  
1.272  
1.268  
1.261  
1.251  
1.224  
1.218  
1.211  
1.197  
1.183

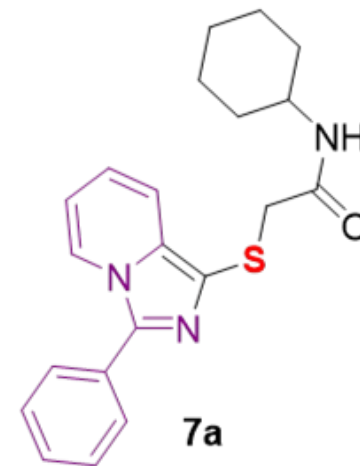

<sup>1</sup>H NMR (CDCl<sub>3</sub>, 500 MHz)

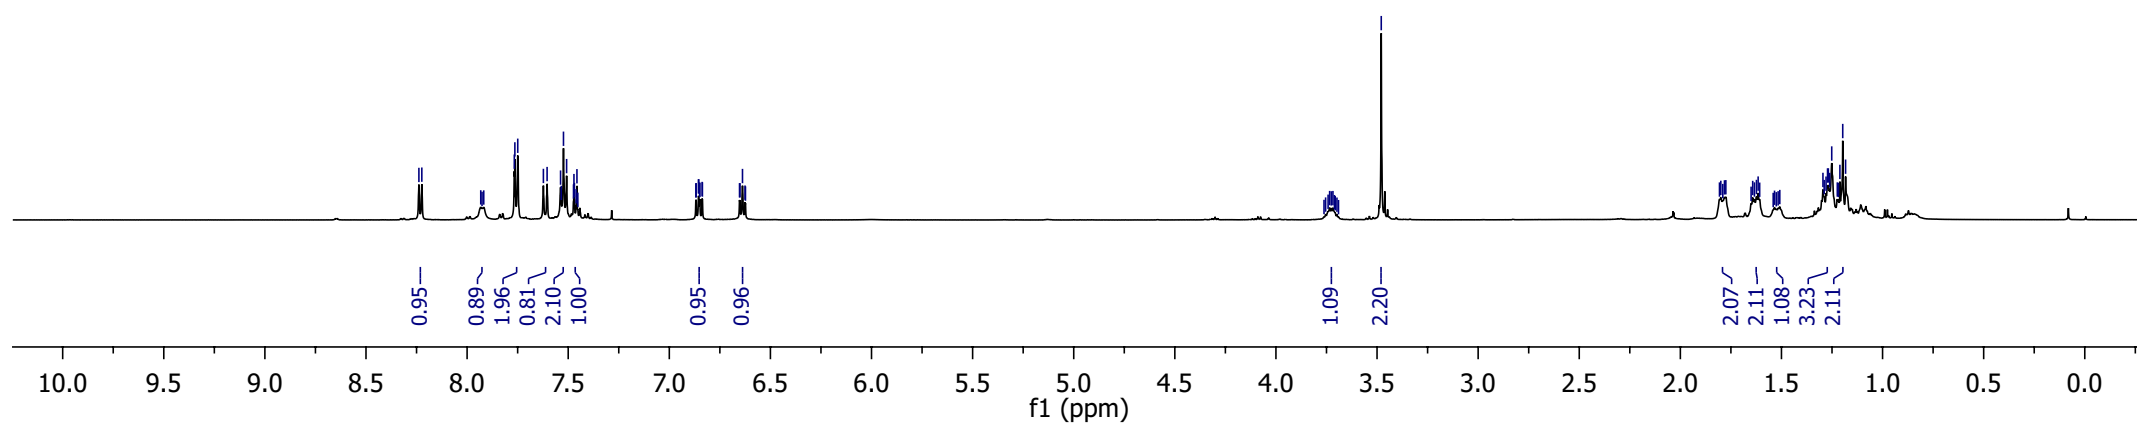

—168.695

—138.548  
—133.210  
—129.568  
—129.204  
—129.029  
—127.976  
—122.007  
—121.869  
—120.687  
—118.333  
—113.984

—65.831

—48.413

—40.206

—32.637

—25.616

—24.556

—15.267

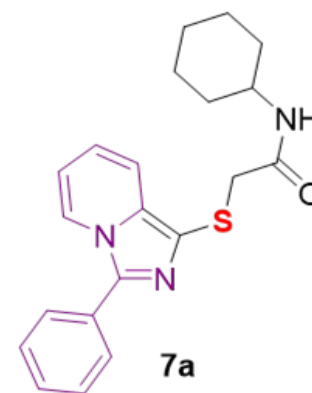

7a

$^{13}\text{C}$  NMR ( $\text{CDCl}_3$ , 125 MHz)

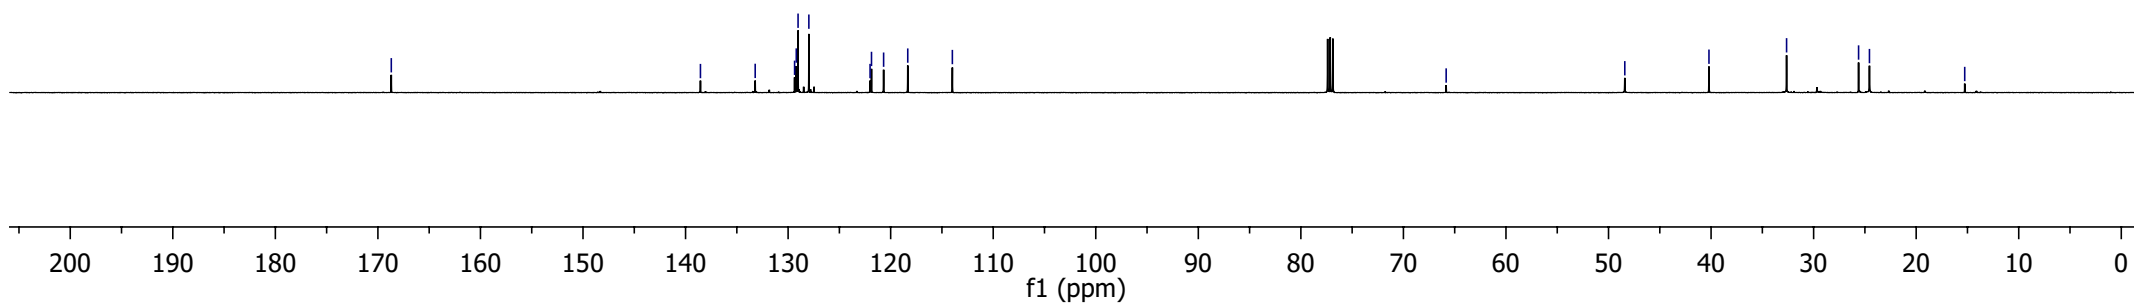

8.388  
8.377  
8.207  
8.204  
8.193  
8.191  
7.528  
7.526  
7.515  
7.490  
7.479  
7.477  
7.115  
7.105  
7.104  
7.094  
7.092

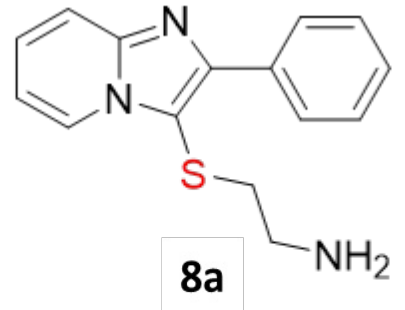

2.171

1.255

<sup>1</sup>H NMR (CDCl<sub>3</sub>, 600 MHz)

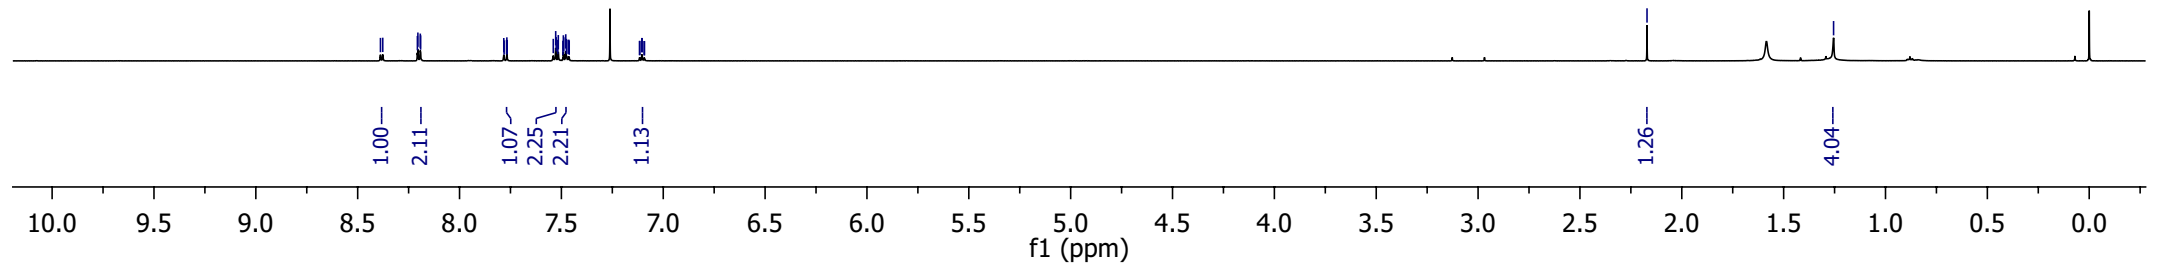

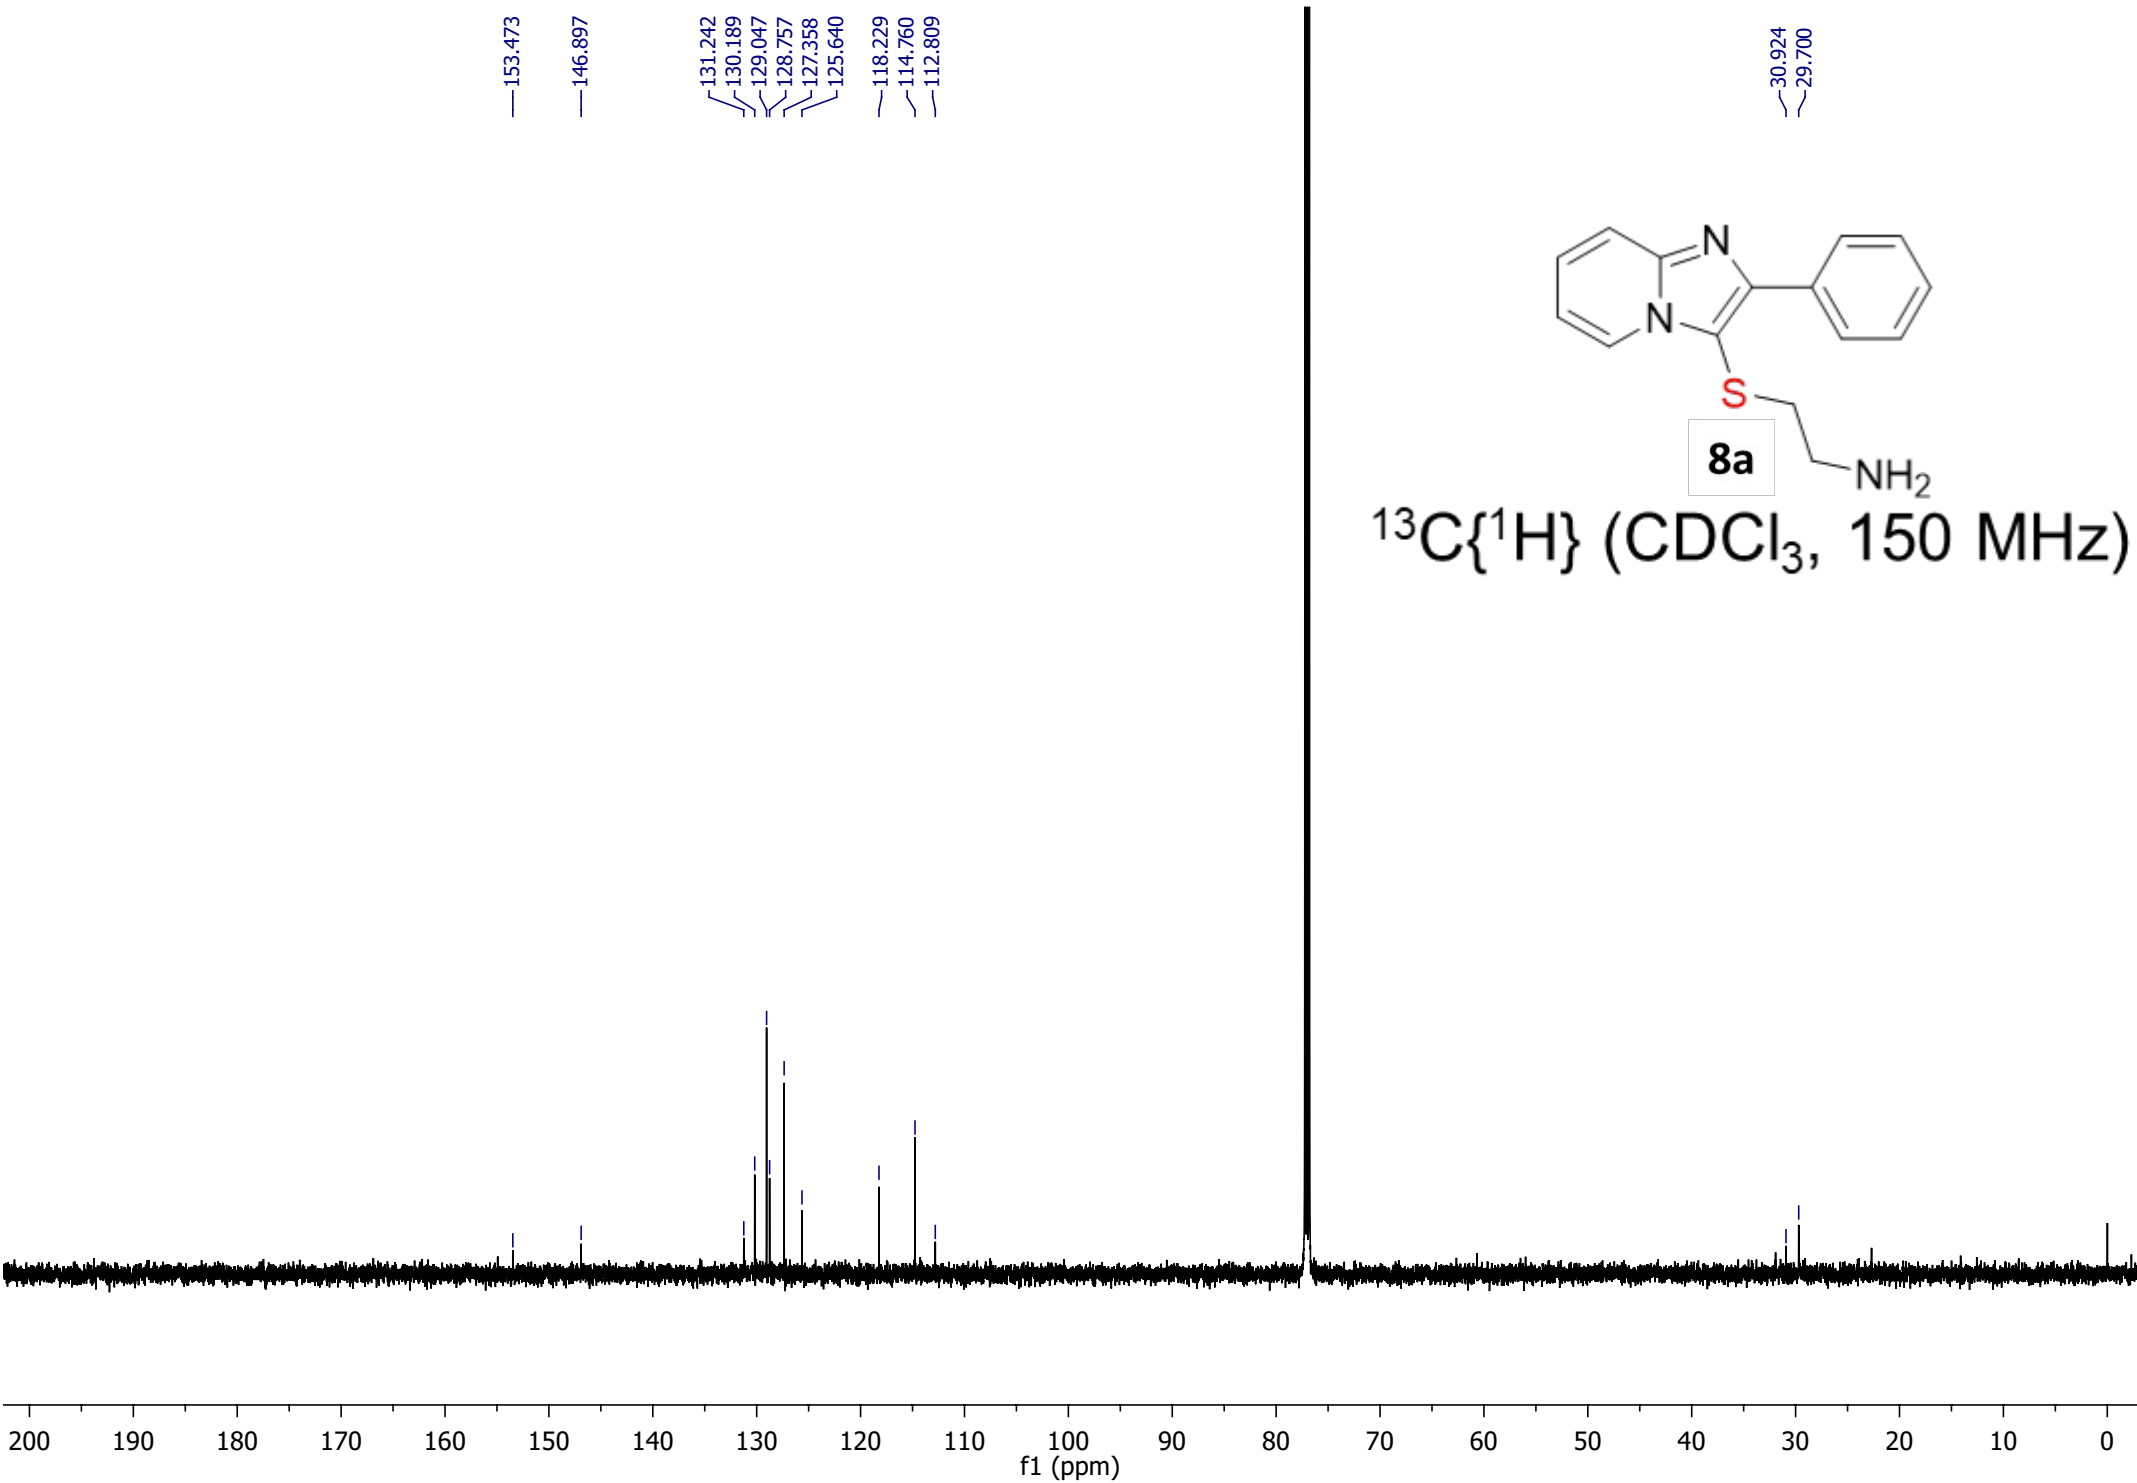

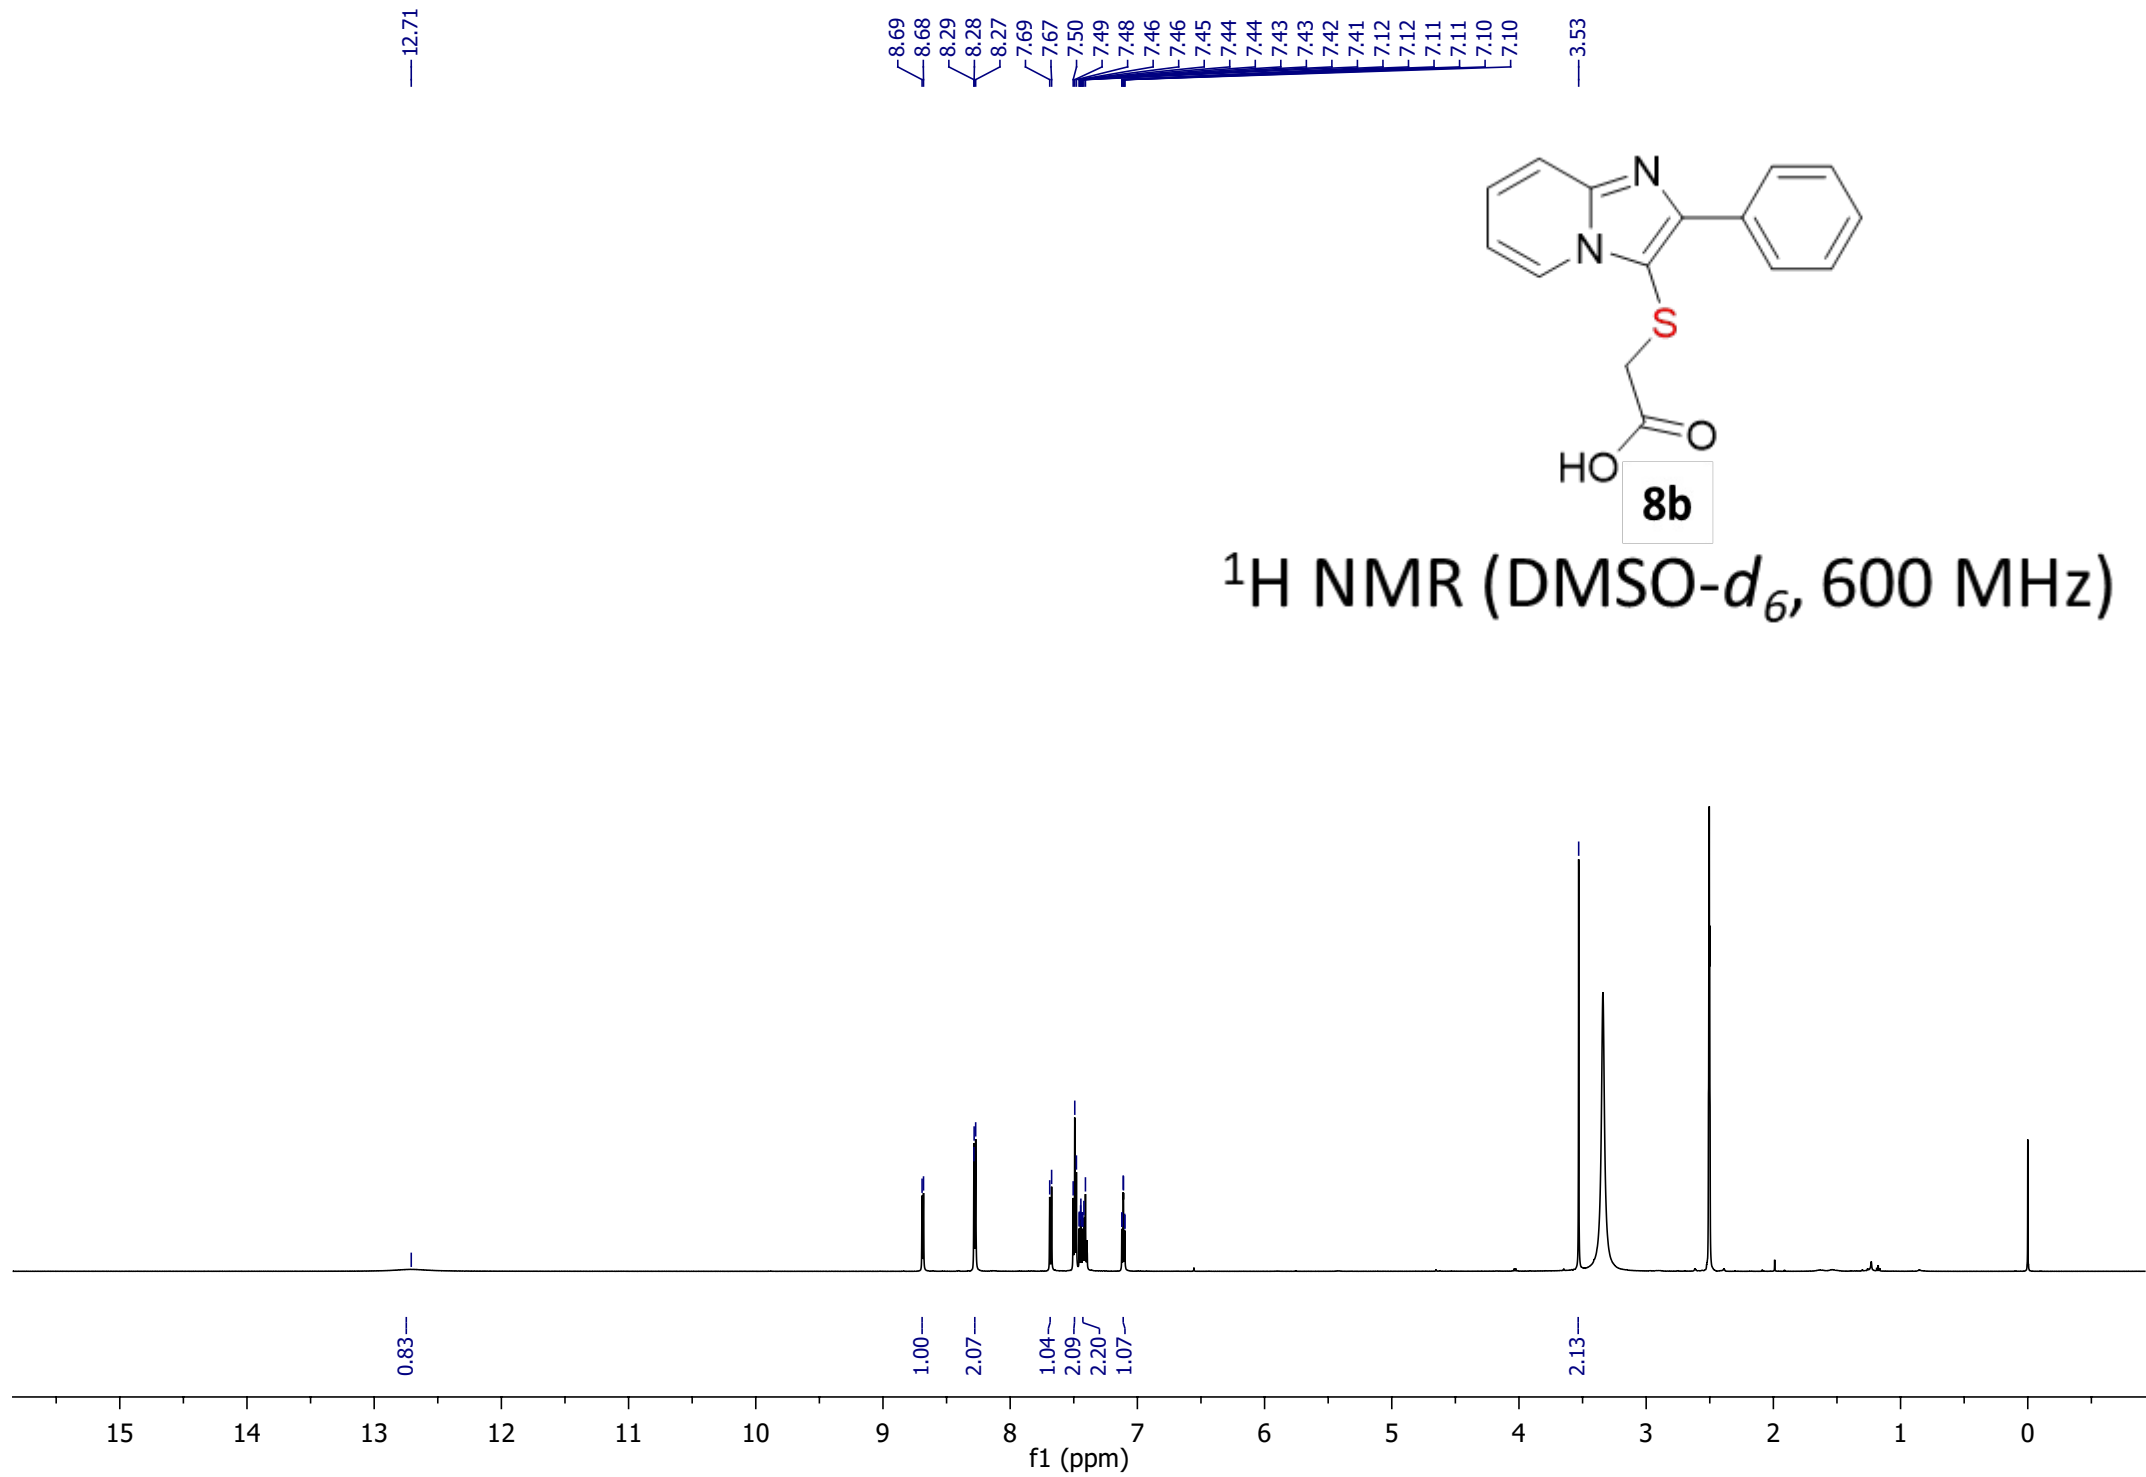

—170.88

—149.10

—146.43

—134.02

—128.82

—128.76

—128.35

—127.41

—125.79

—117.43

—113.55

—108.66

—37.32

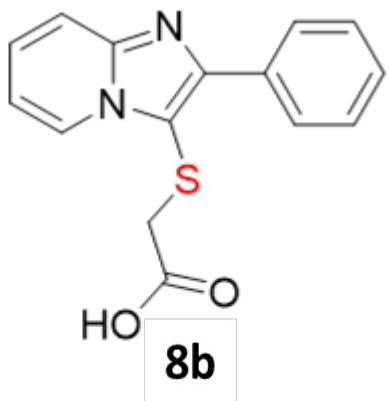

$^{13}\text{C}\{^1\text{H}\}$  (DMSO- $d_6$ , 150 MHz)

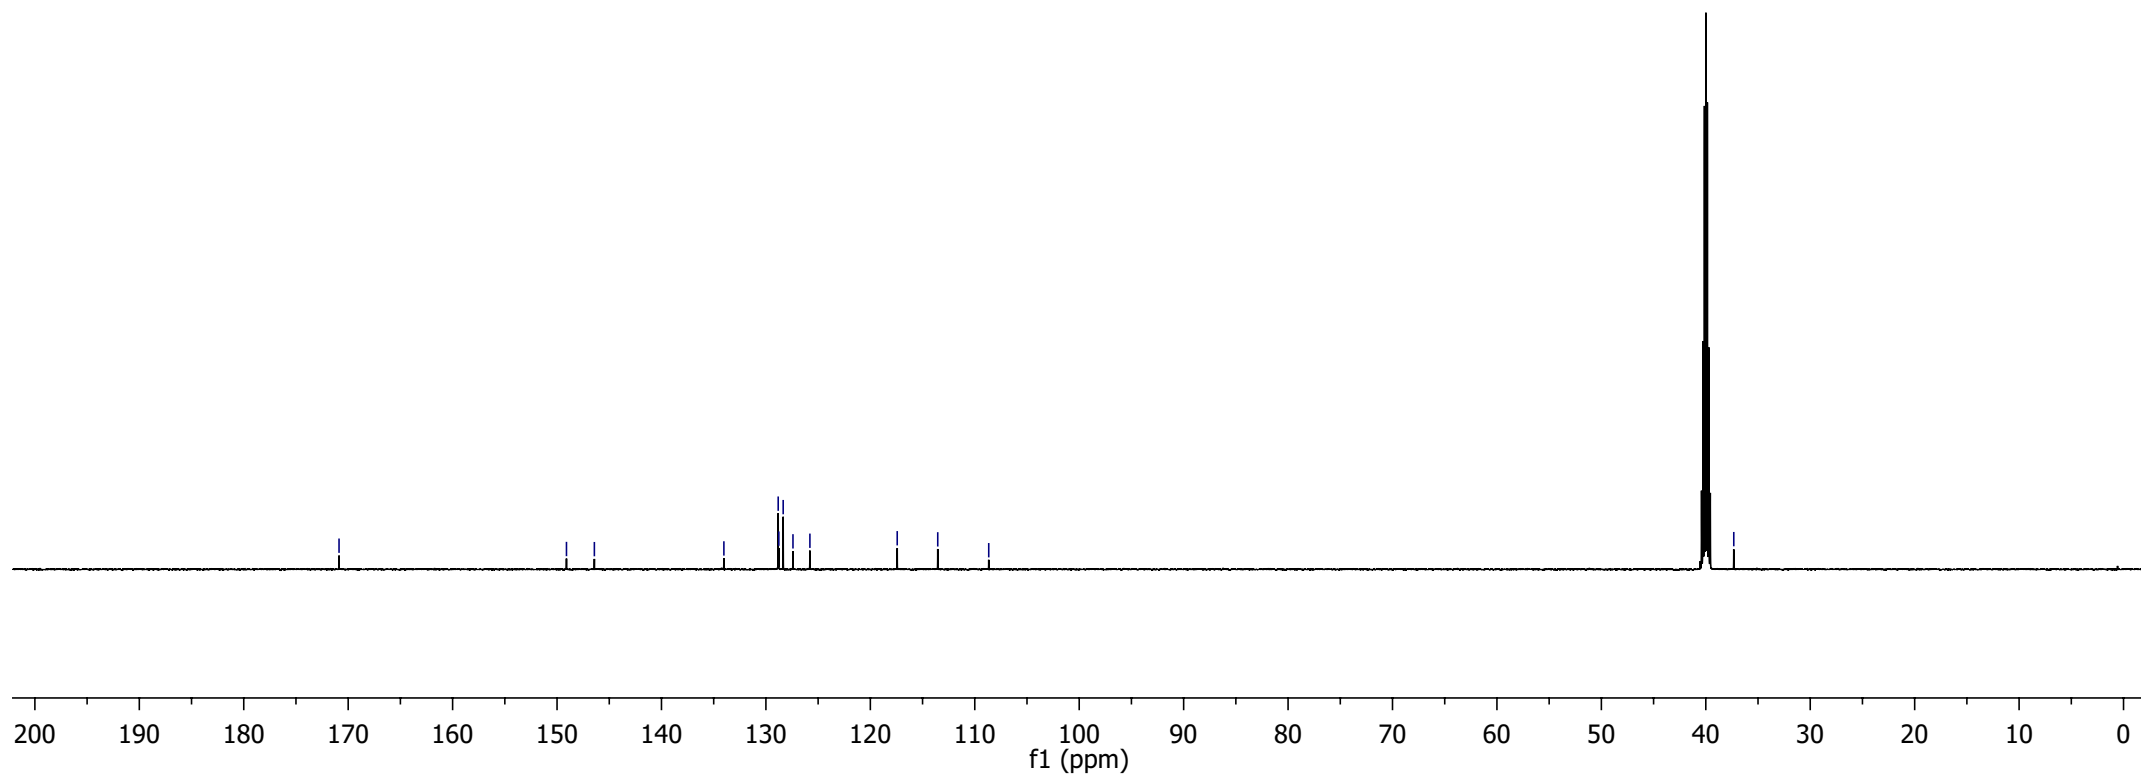

9.153  
9.141  
8.831  
8.828  
8.817  
8.329  
8.314  
8.189  
8.177  
8.164  
8.119  
8.106  
8.021  
8.019  
8.010  
8.007  
8.004  
7.995  
7.993  
6.788

3.890

2.973  
2.967  
2.961  
2.955  
2.949  
2.943  
2.937  
2.931

1.129  
1.120  
1.117  
1.108  
1.106  
1.096  
0.573  
0.564  
0.562  
0.558  
0.555  
0.546

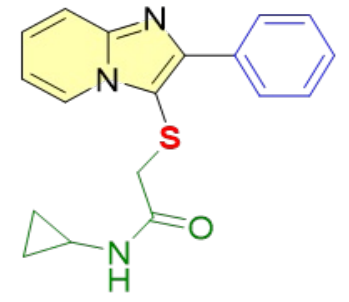

8c

<sup>1</sup>H NMR (CDCl<sub>3</sub>, 600 MHz)

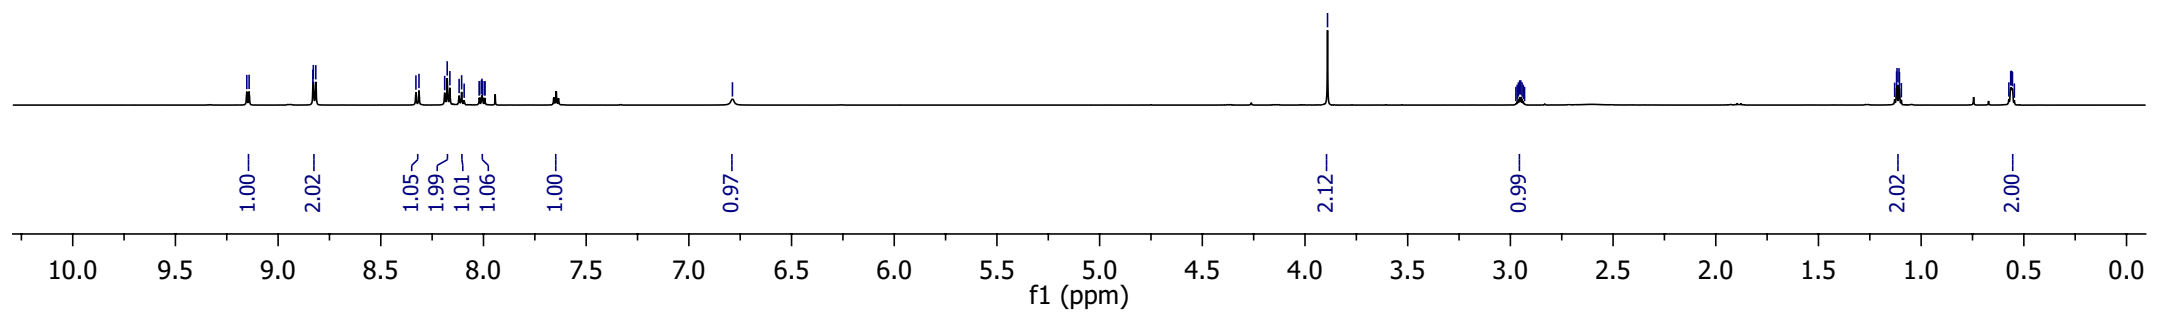

—167.84  
—149.22  
—145.82  
—132.39  
—127.76  
—127.61  
—125.69  
—123.45  
—116.77  
—112.23  
—107.02

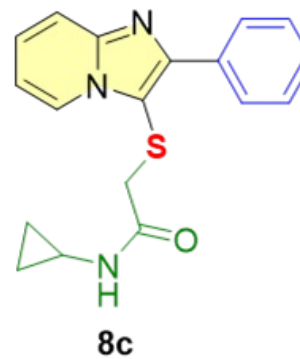

—37.25  
—21.59  
—4.95

$^{13}\text{C}$  NMR ( $\text{CDCl}_3$ , 150 MHz)

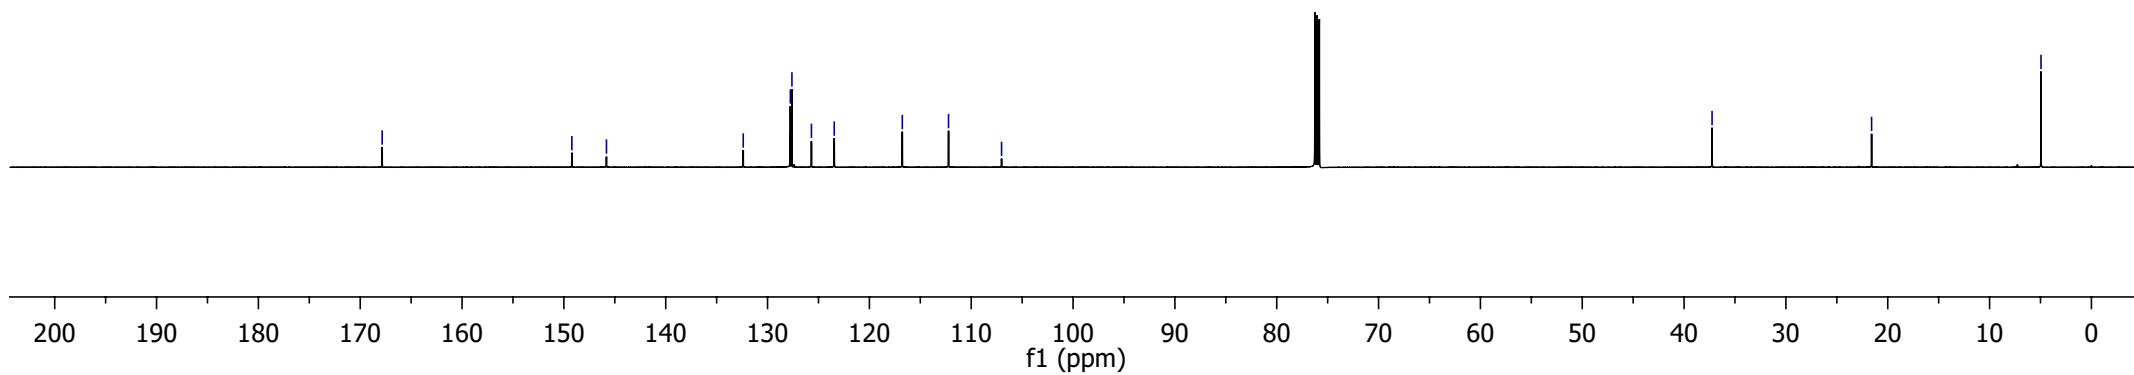

8.58  
8.58  
8.58  
8.58  
8.30  
8.30  
7.68  
7.66  
7.64  
7.64  
7.52  
7.52  
7.51  
7.51  
7.50  
7.49  
7.45  
7.45  
7.45  
7.44  
7.44  
7.43  
7.42  
7.42  
7.42  
7.33  
7.33  
7.31  
7.31

3.28  
3.27  
3.26  
3.26  
3.25  
3.25  
3.08  
3.07  
3.07  
3.06  
3.05  
3.05

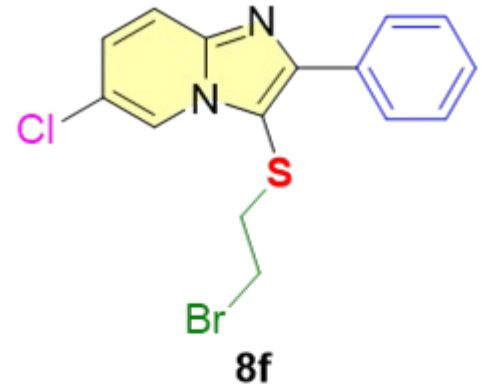

<sup>1</sup>H NMR (CDCl<sub>3</sub>, 500 MHz)

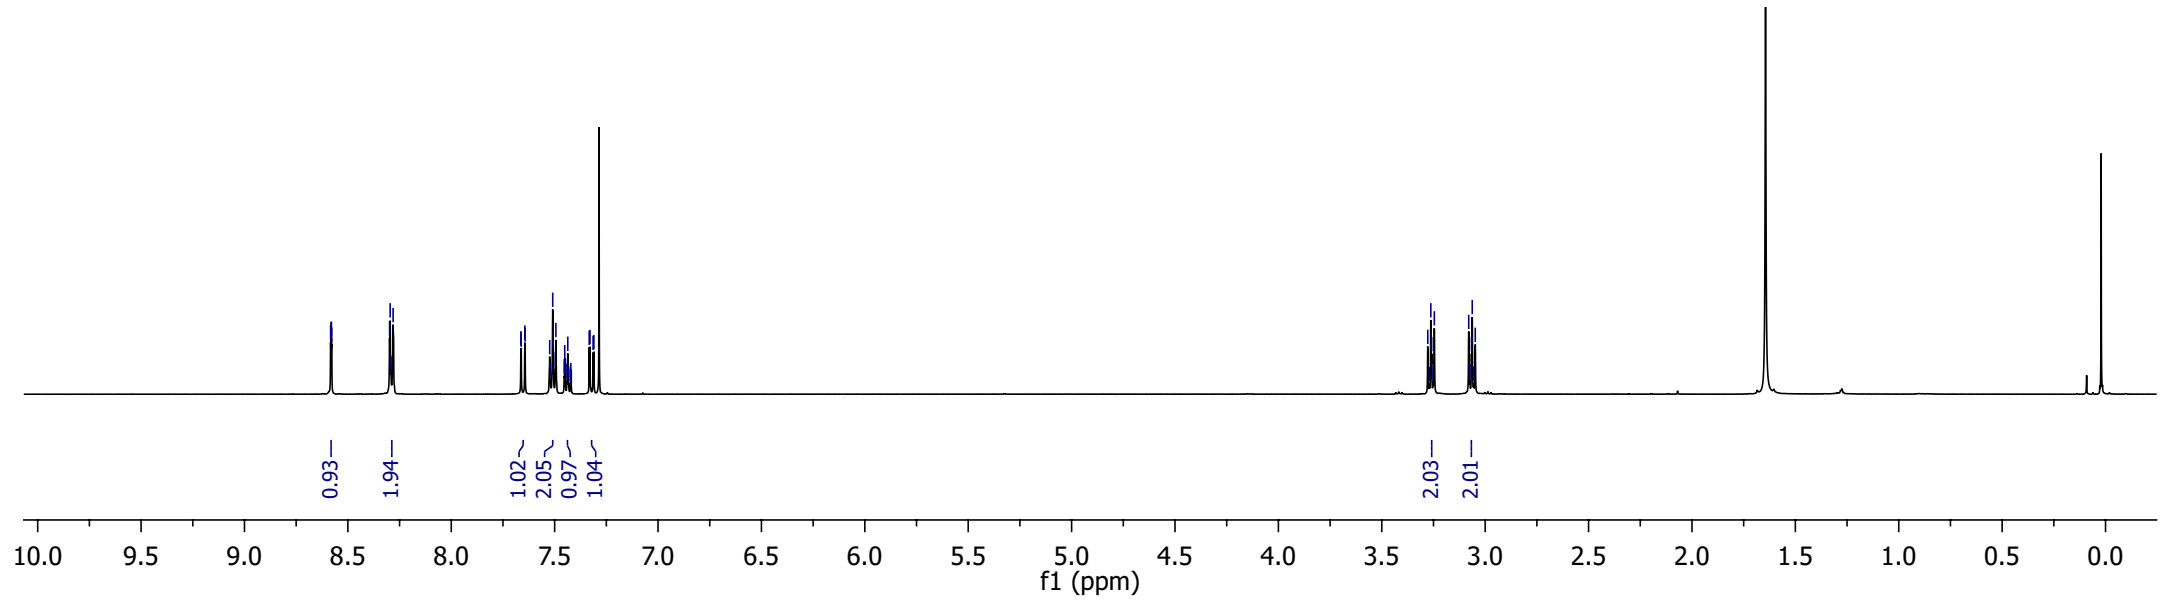

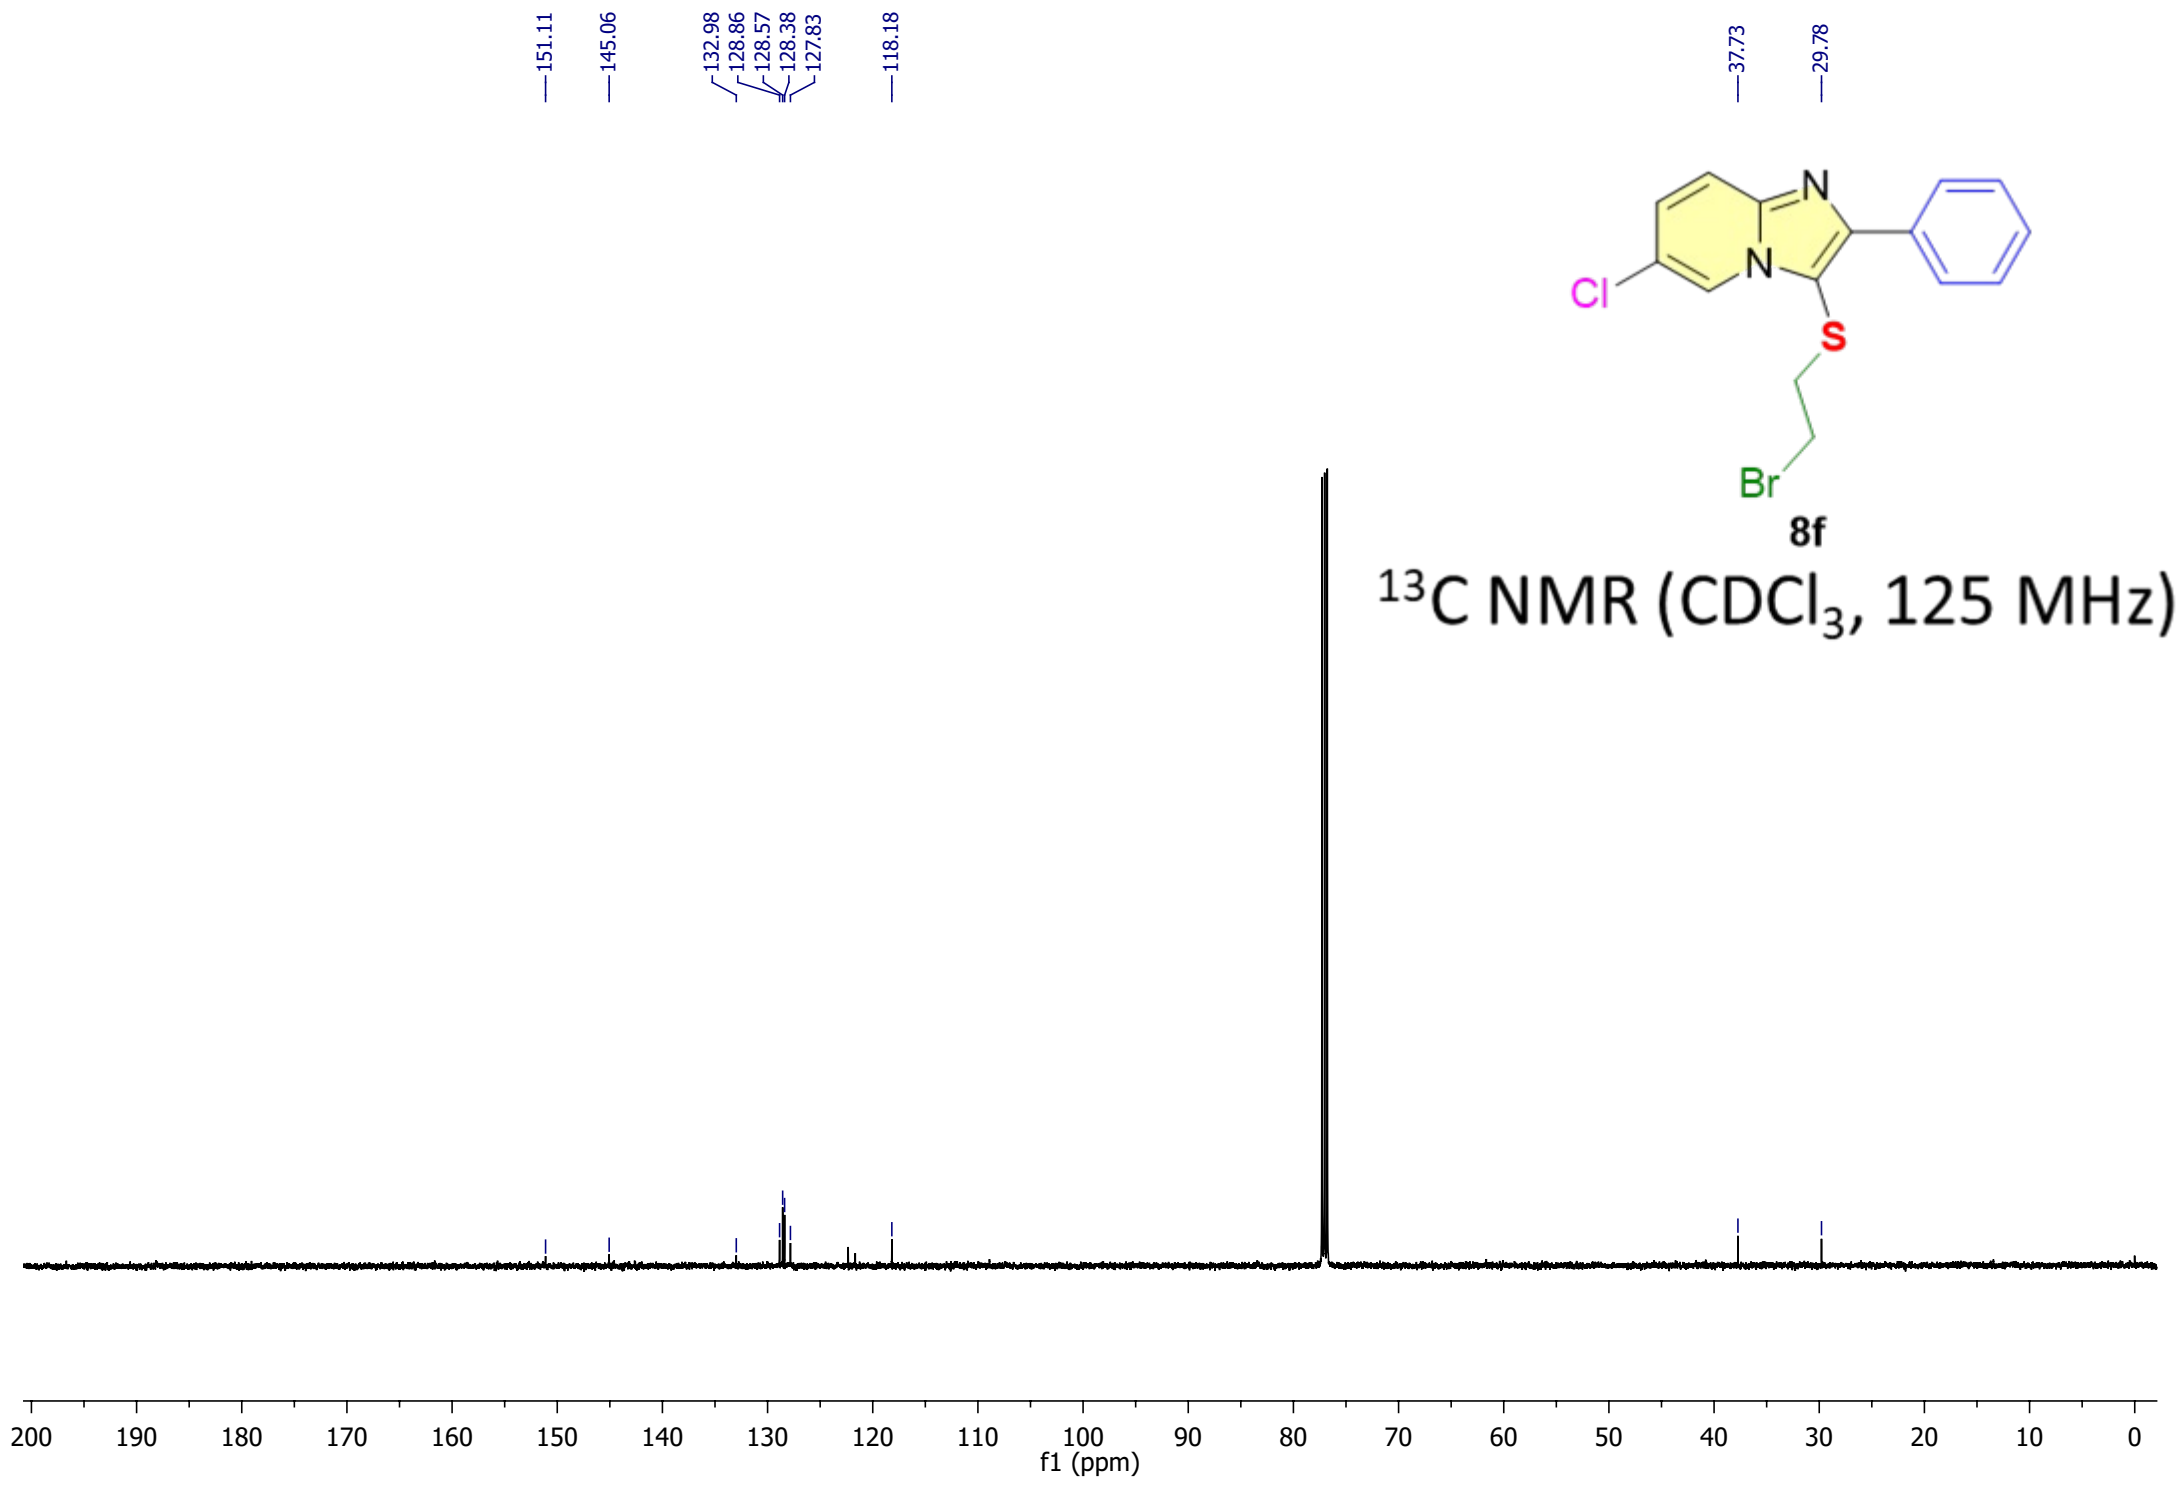

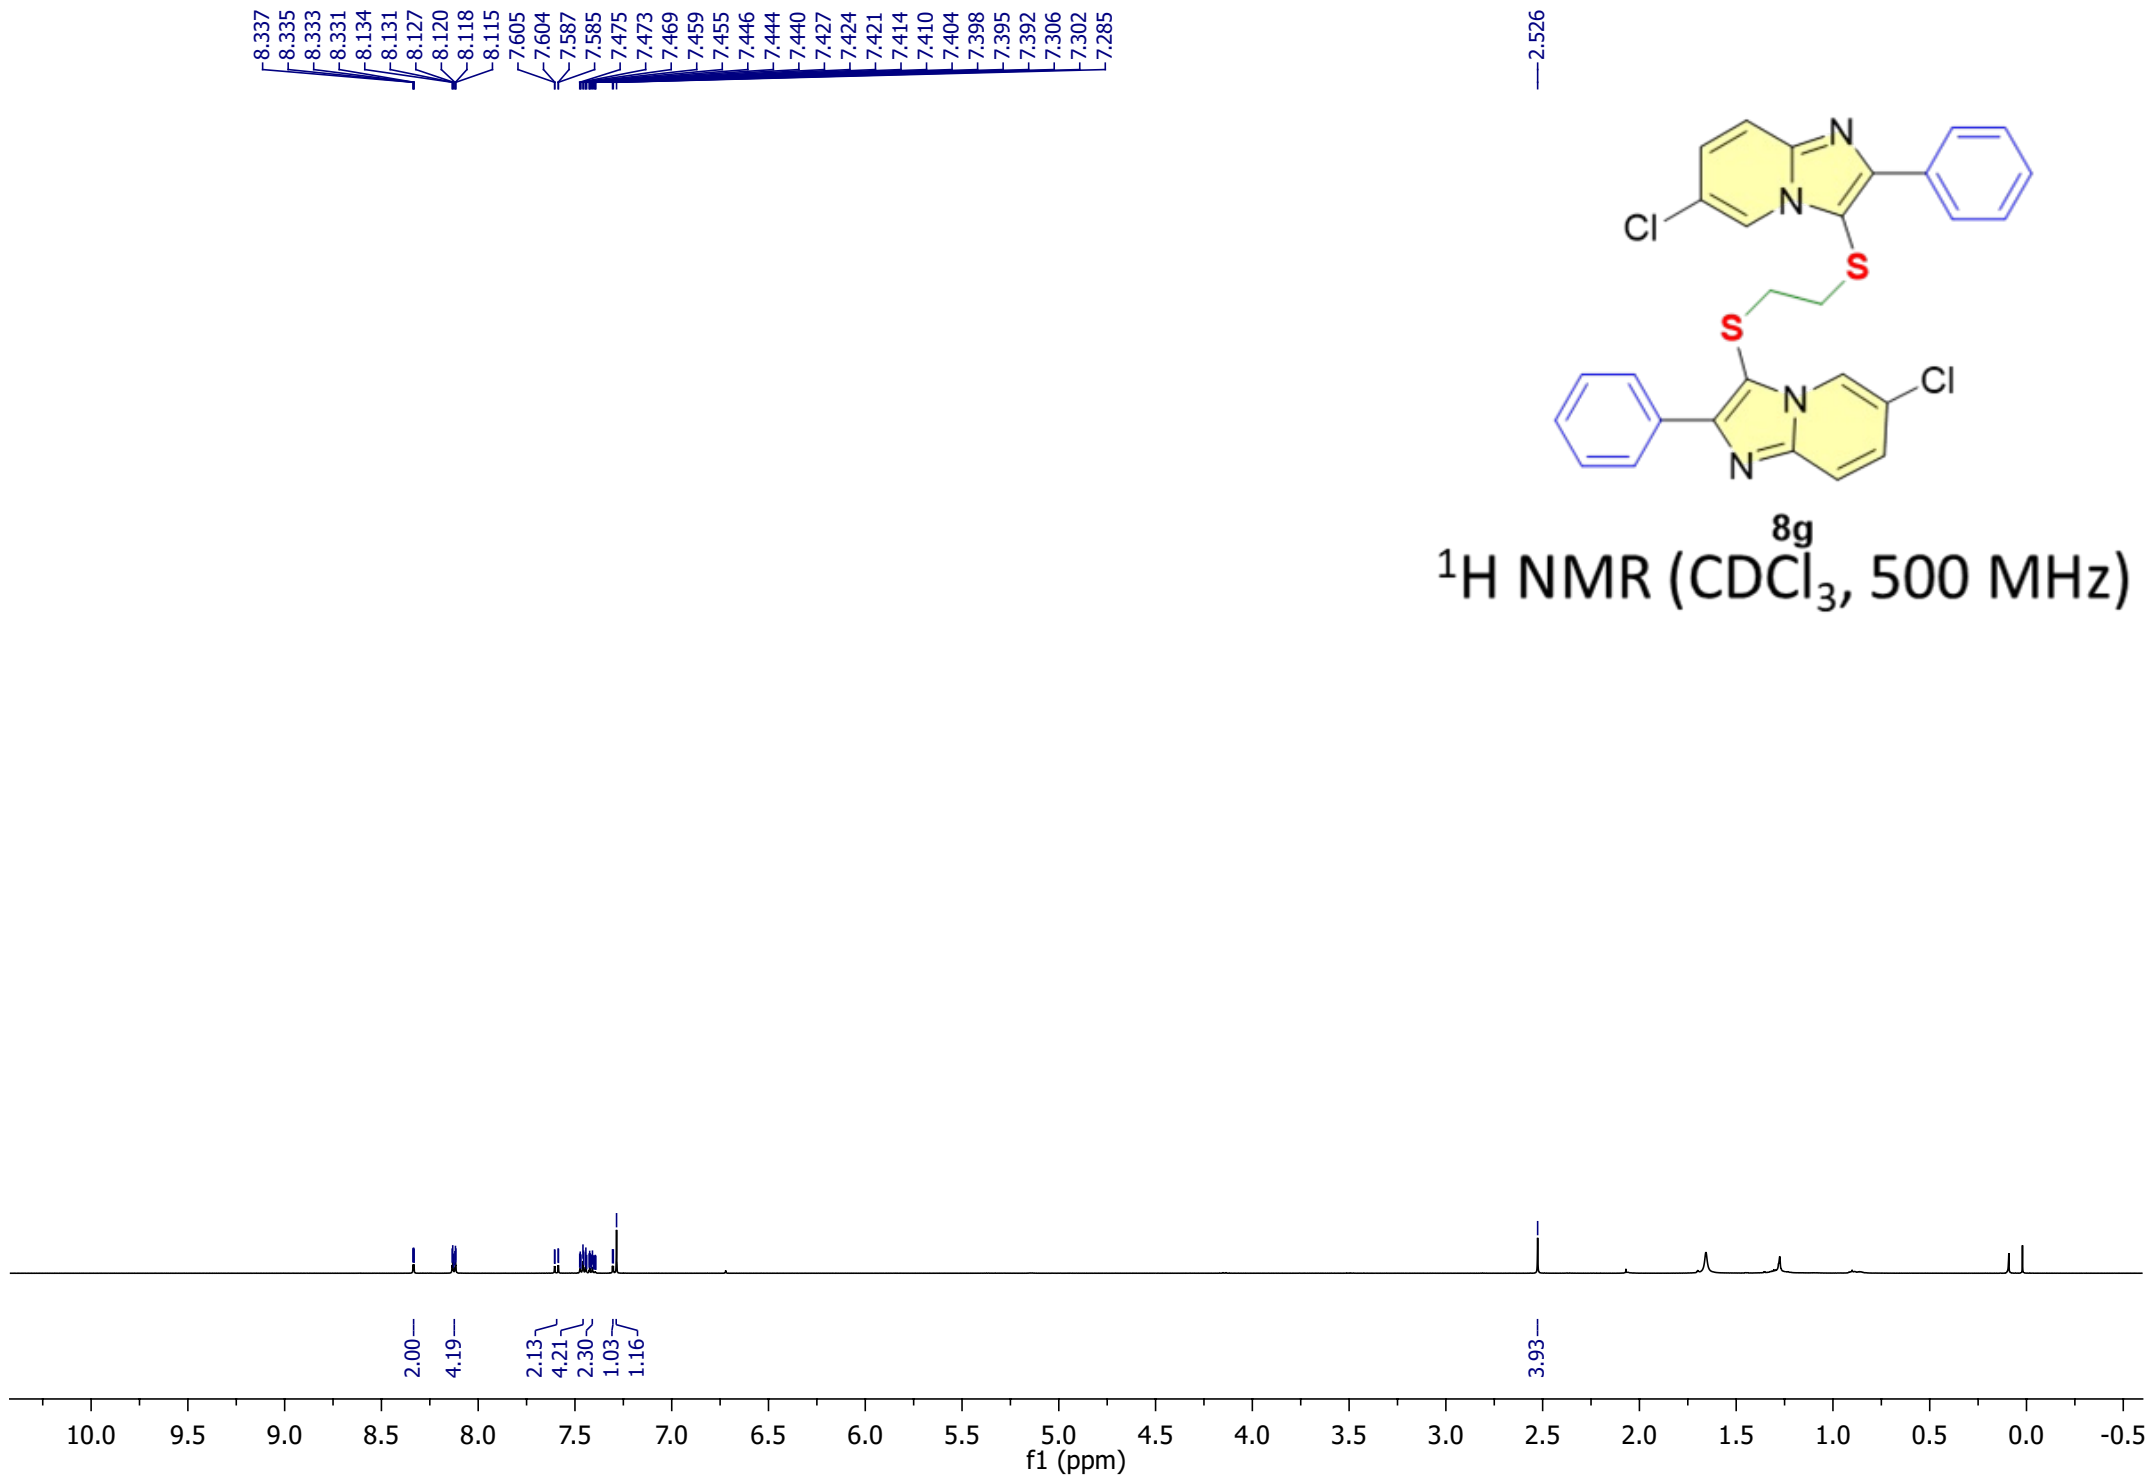

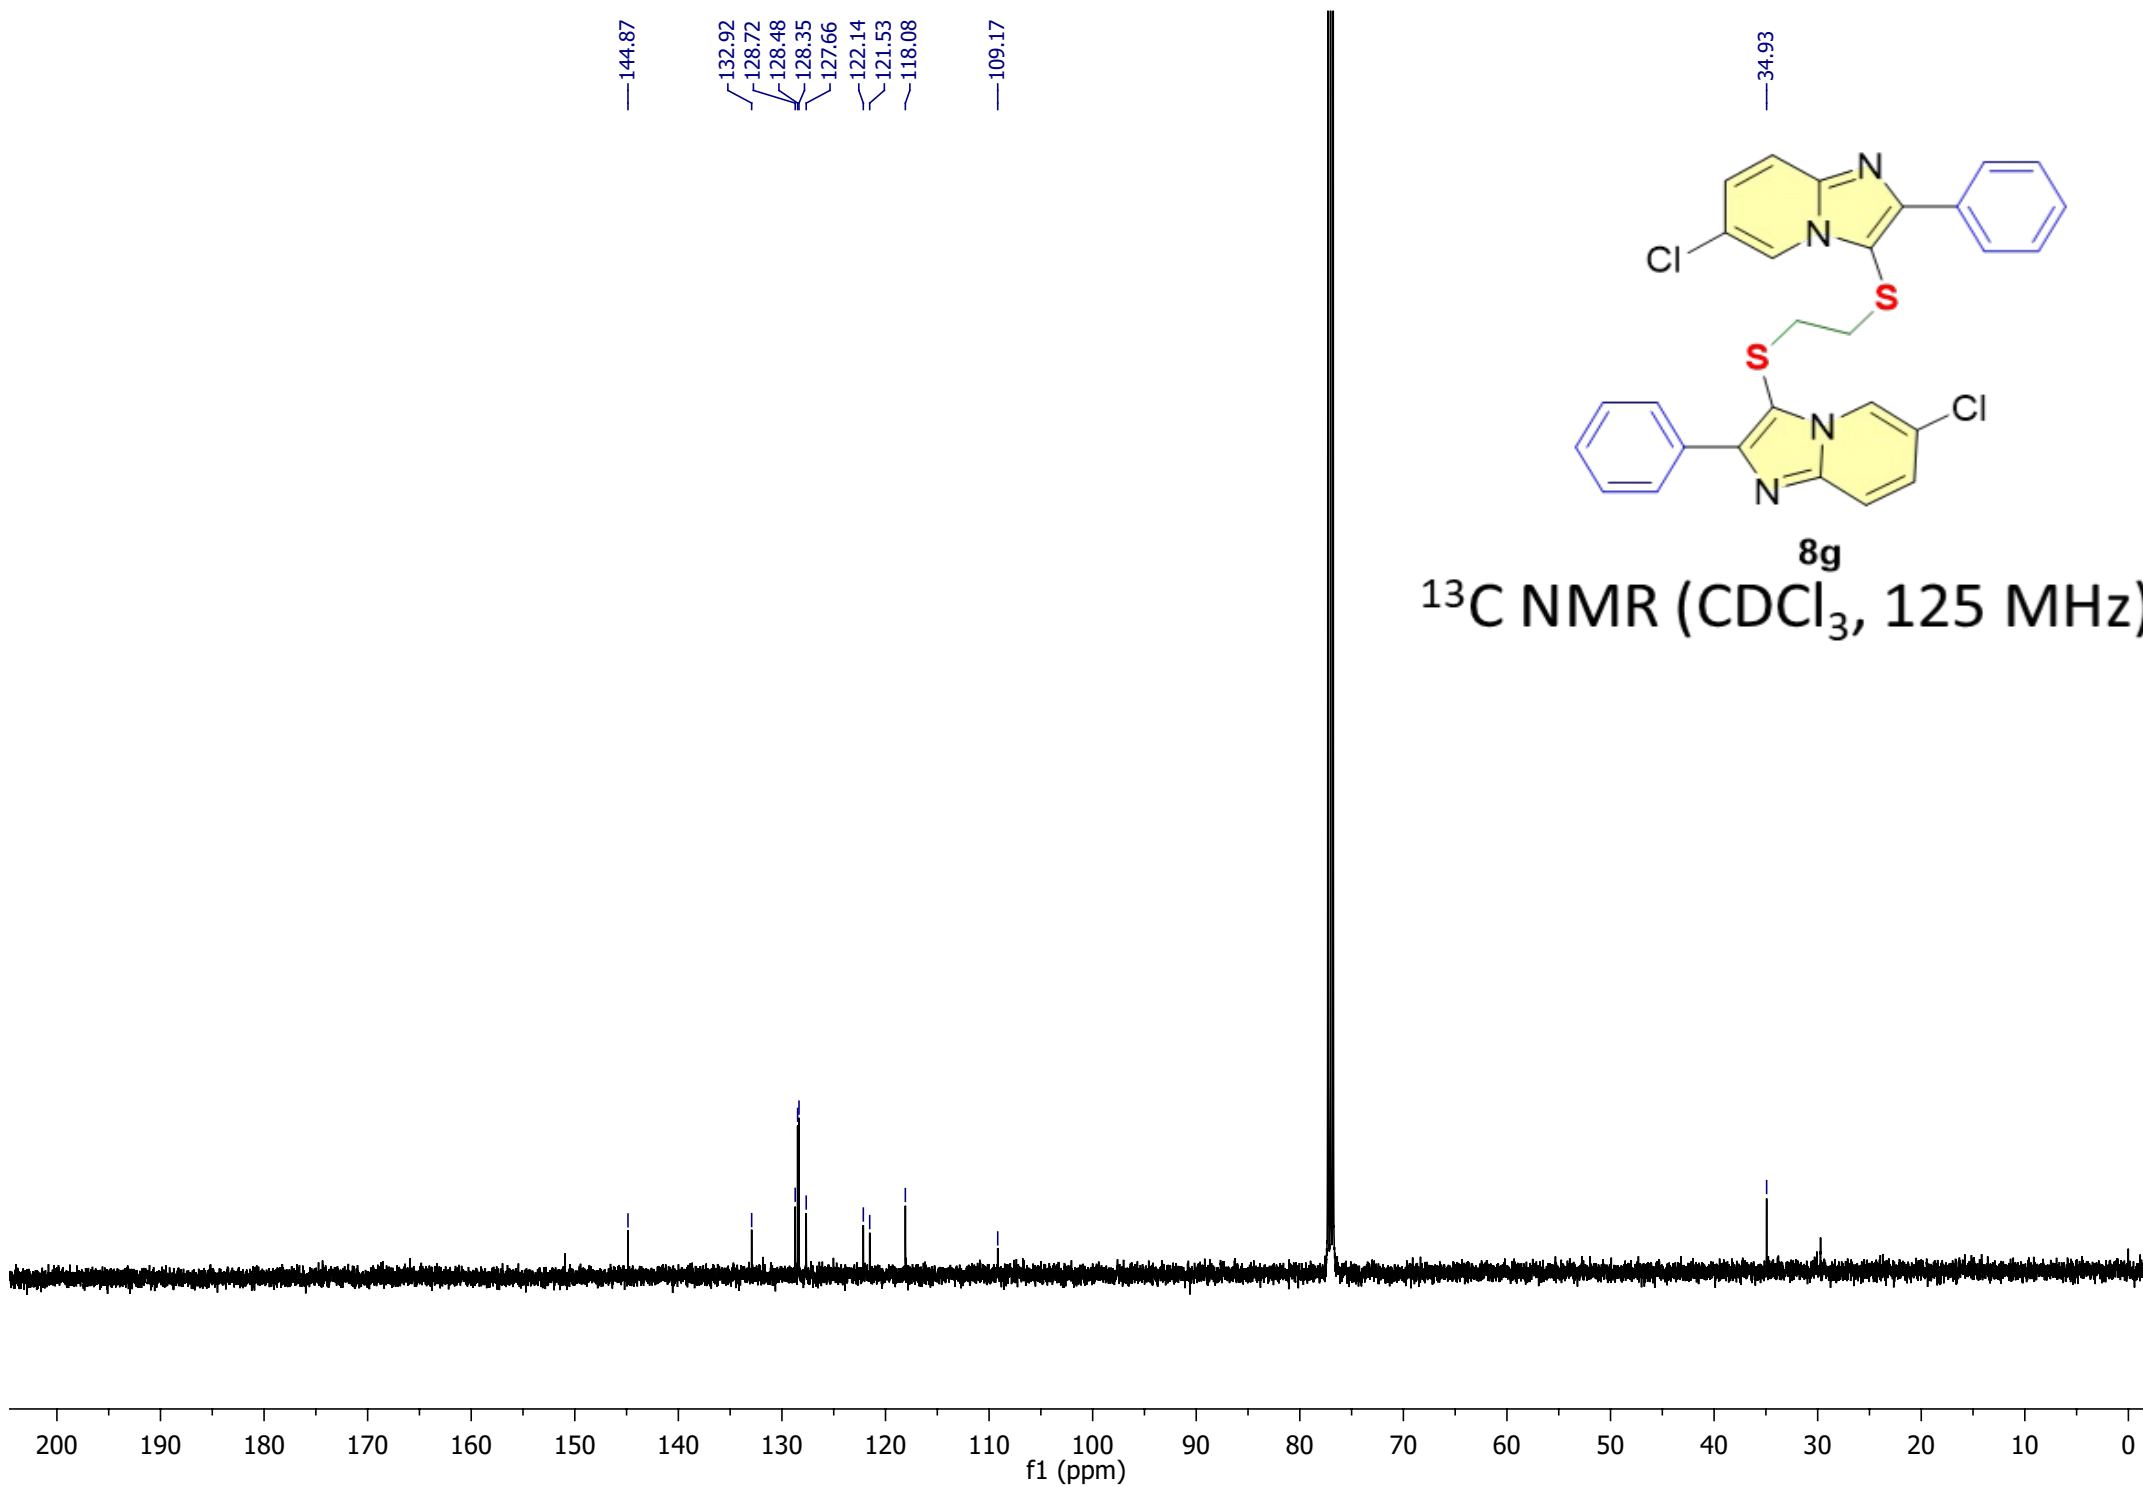

7.551  
7.537  
7.469  
7.455  
7.146  
6.931  
6.917

5.751  
5.729

3.840

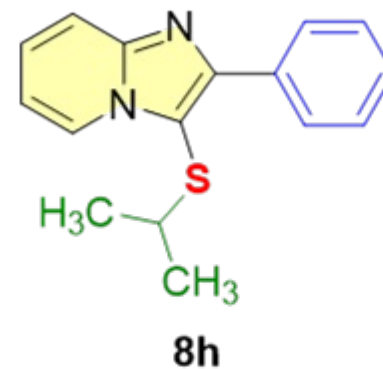

$^1\text{H}$  NMR ( $\text{CDCl}_3$ , 600 MHz)

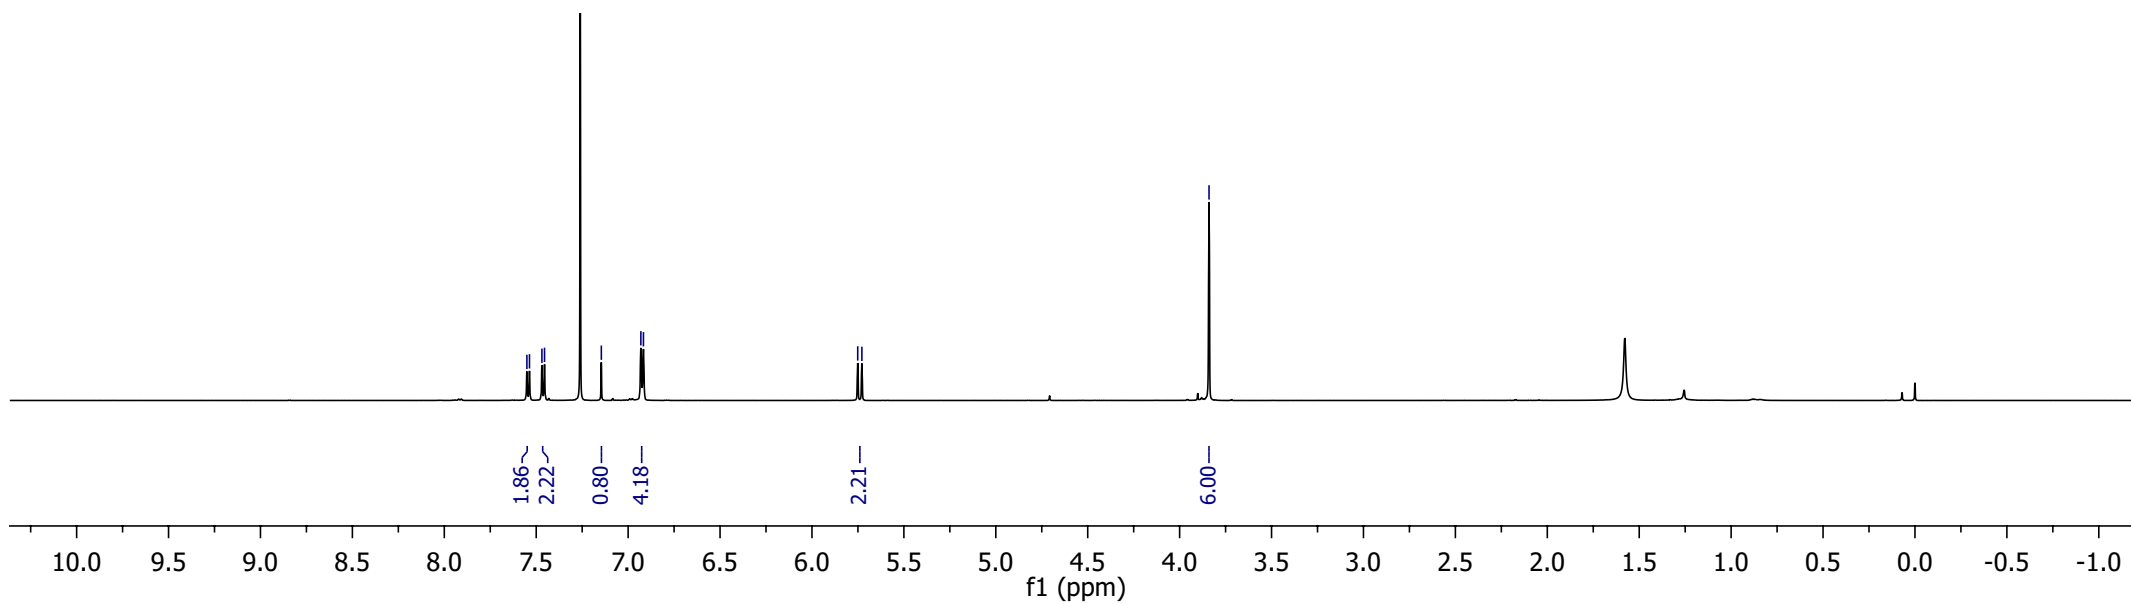

—160.93  
—159.12

—142.60

—134.40

—128.61  
—127.96  
—127.36  
—126.84

—122.90

—117.31  
—114.31  
—114.25

—110.07

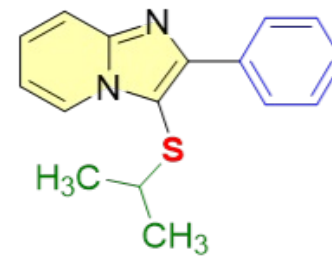

8h

$^{13}\text{C}\{^1\text{H}\}$  ( $\text{CDCl}_3$ , 150 MHz)

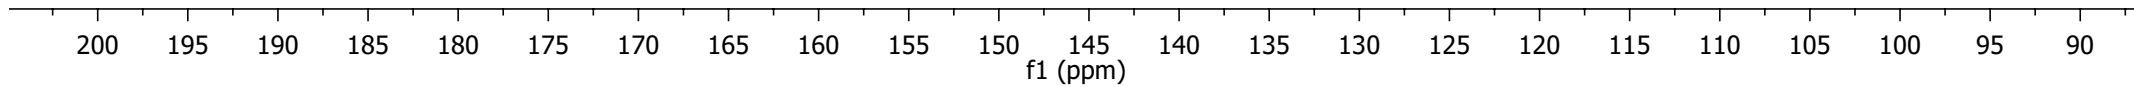

8.108  
8.095  
7.612  
7.600  
7.558  
7.548  
7.488  
7.106  
7.093  
7.080  
6.352  
6.341  
6.330

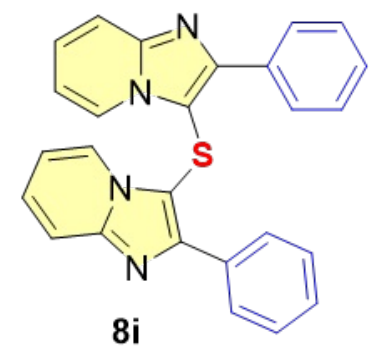

<sup>1</sup>H NMR (CDCl<sub>3</sub>, 600 MHz)

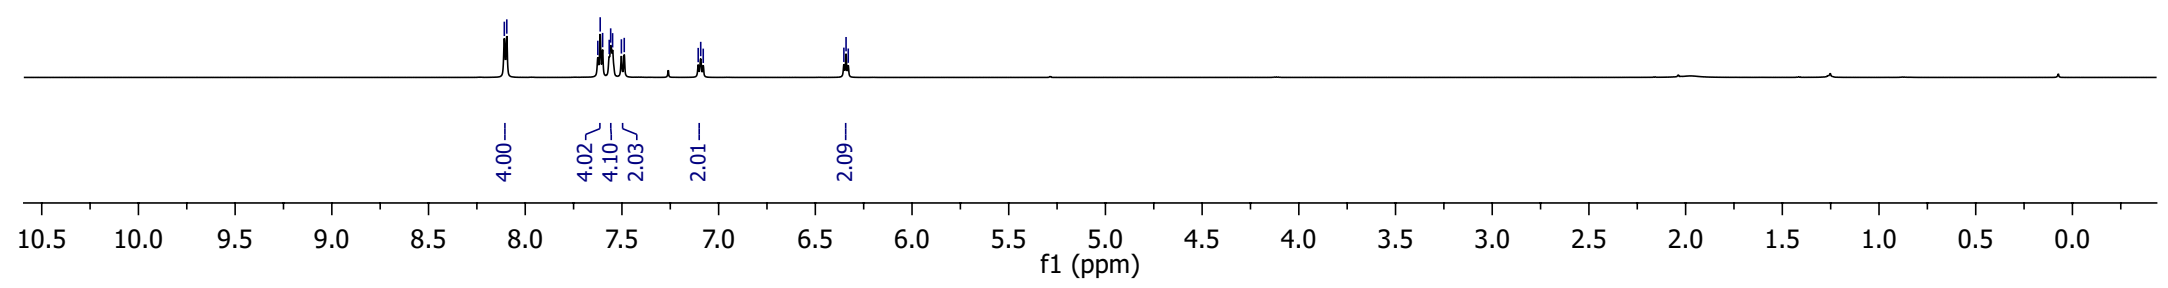

—150.93  
—146.56  
133.83  
129.59  
128.93  
128.61  
126.38  
125.37  
—117.40  
—112.59  
—107.49

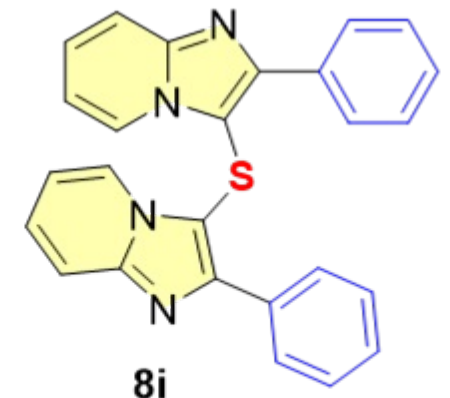

8i

$^{13}\text{C}\{^1\text{H}\}$  (CDCl<sub>3</sub>, 150 MHz)

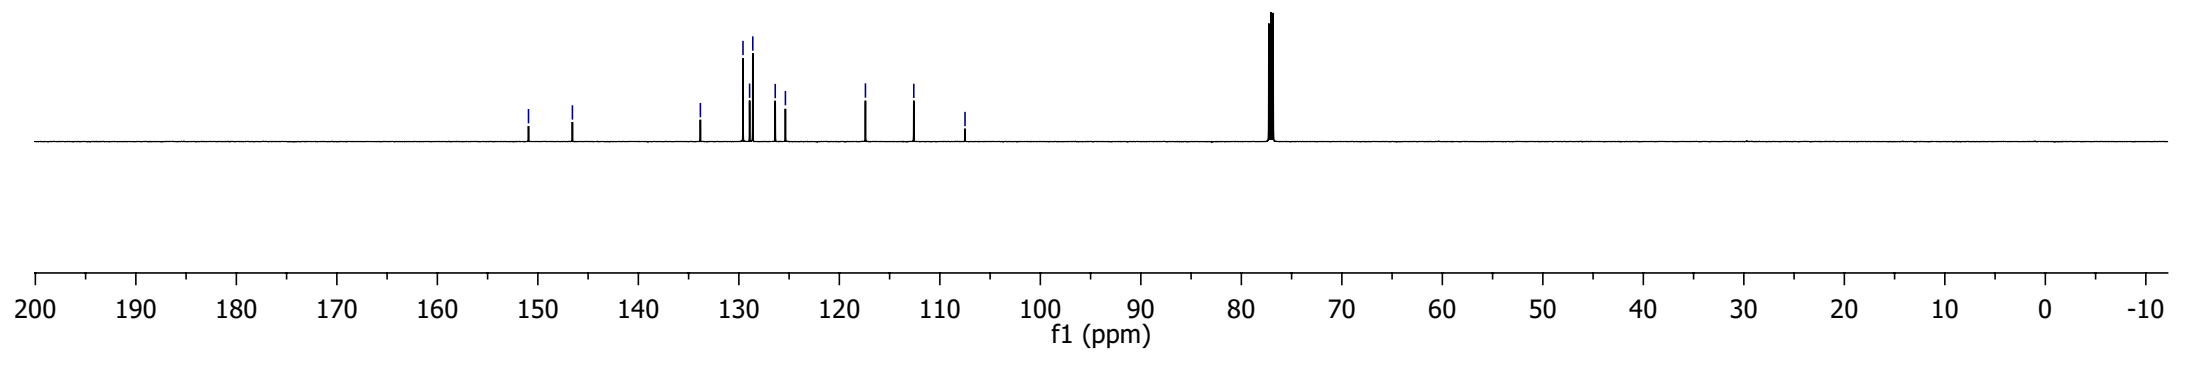

8.146  
8.133  
7.944  
7.932  
7.477  
7.462  
7.356  
7.343  
7.330  
7.275  
7.263  
7.251  
7.060  
7.048  
7.034  
6.972  
6.960  
6.948  
6.938  
6.926  
6.914  
6.793  
6.781  
6.535  
6.523  
6.512

3.677

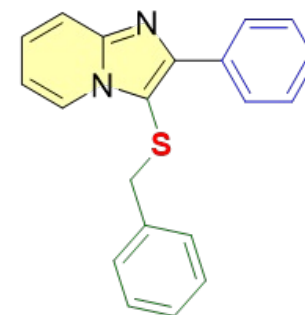

8j

$^1\text{H NMR}$  ( $\text{CDCl}_3$ , 600 MHz)

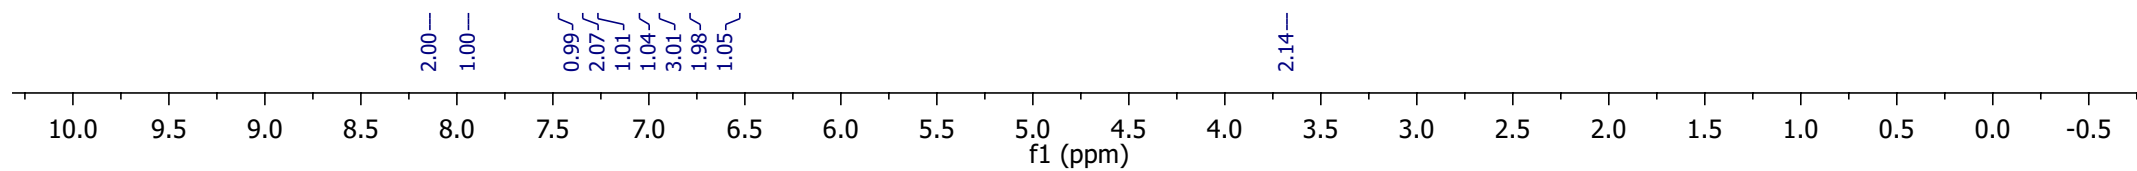

—150.11  
—146.41  
  
—137.13  
—133.78  
—128.69  
—128.46  
—128.32  
—128.27  
—127.35  
—117.22  
  
—112.26  
—109.40

—40.56

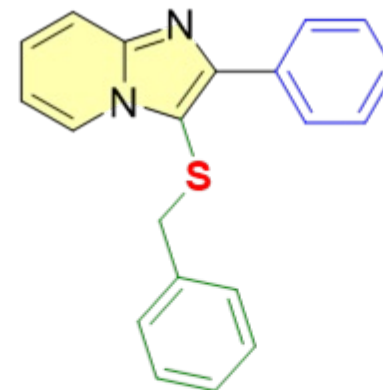

8j

$^{13}\text{C}\{^1\text{H}\}$  ( $\text{CDCl}_3$ , 150 MHz)

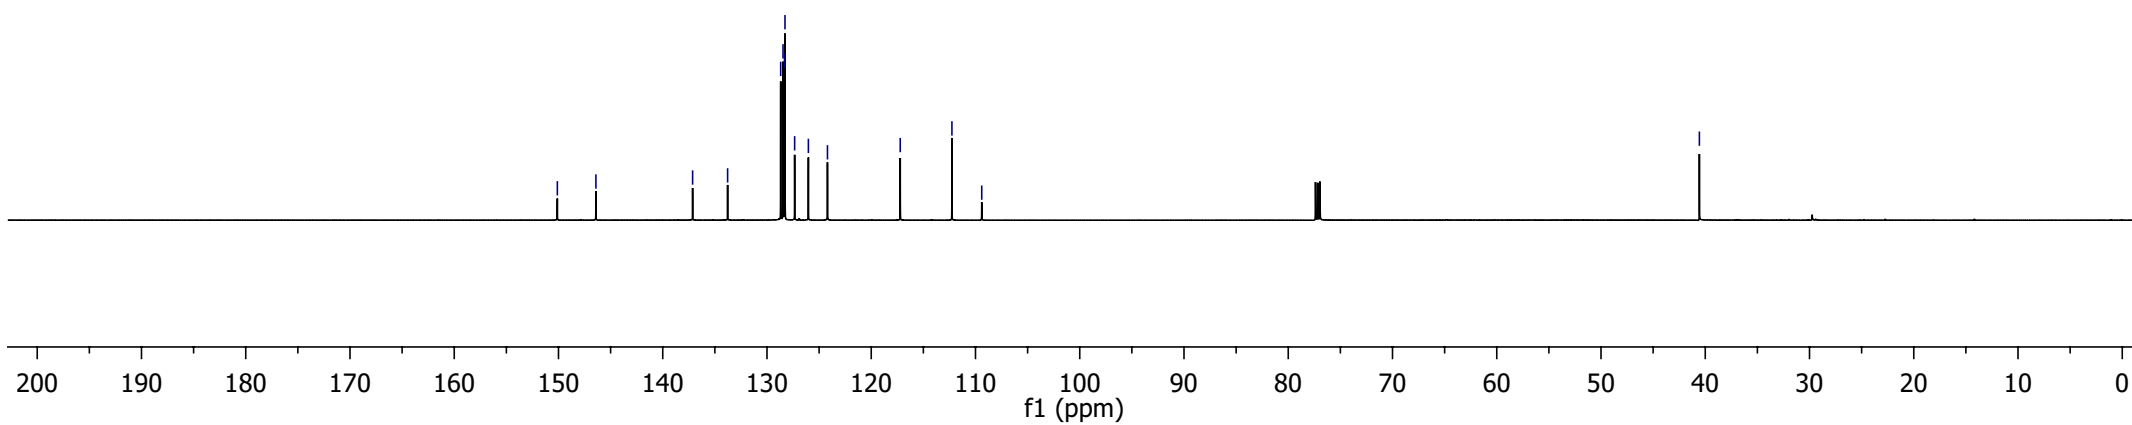

8.554  
8.543  
8.177  
8.164  
7.664  
7.649  
7.490  
7.478  
7.465  
7.399  
6.936  
6.924

3.402  
3.395  
3.388  
3.383  
3.377  
3.371  
3.364  
3.359  
3.353  
3.346  
3.340  
3.176

1.519  
1.512  
1.502  
1.496  
1.450  
1.446  
1.430  
1.160  
1.139  
1.117  
0.973  
0.972  
0.638  
0.622  
0.603  
0.600  
0.584  
0.579

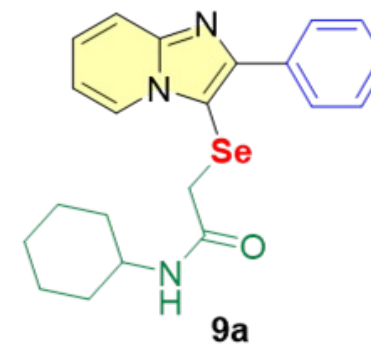

$^1\text{H NMR}$  ( $\text{CDCl}_3$ , 600 MHz)

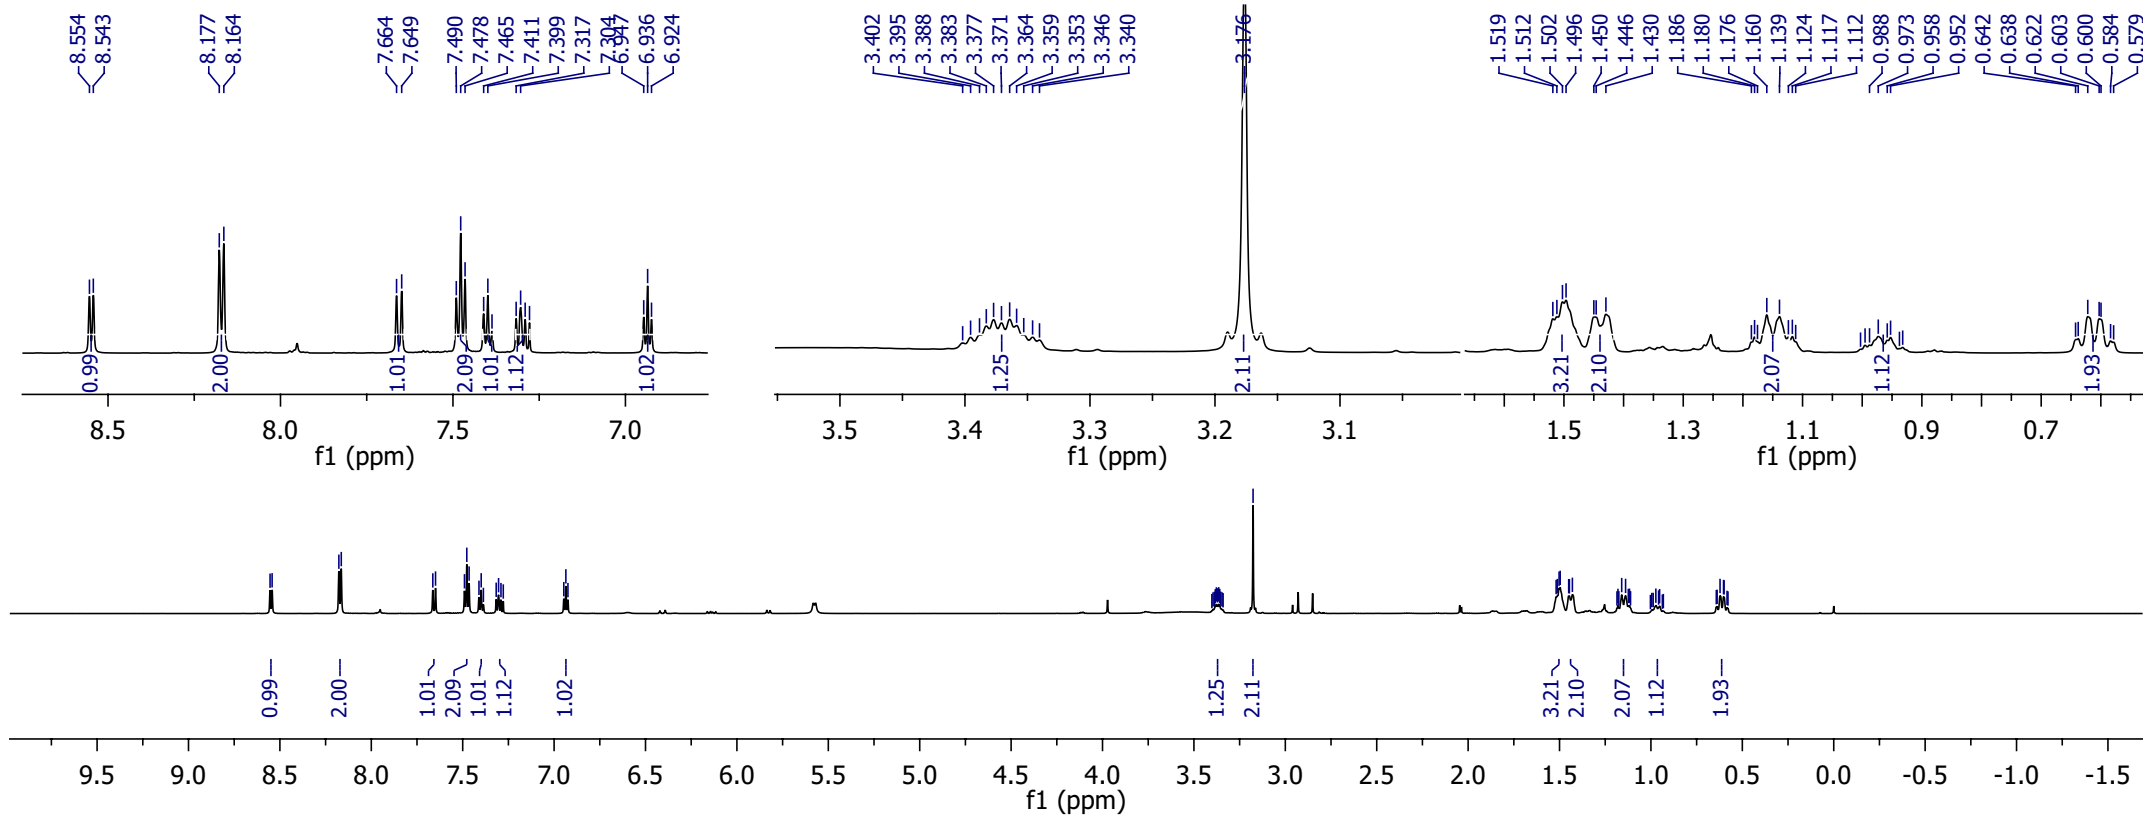



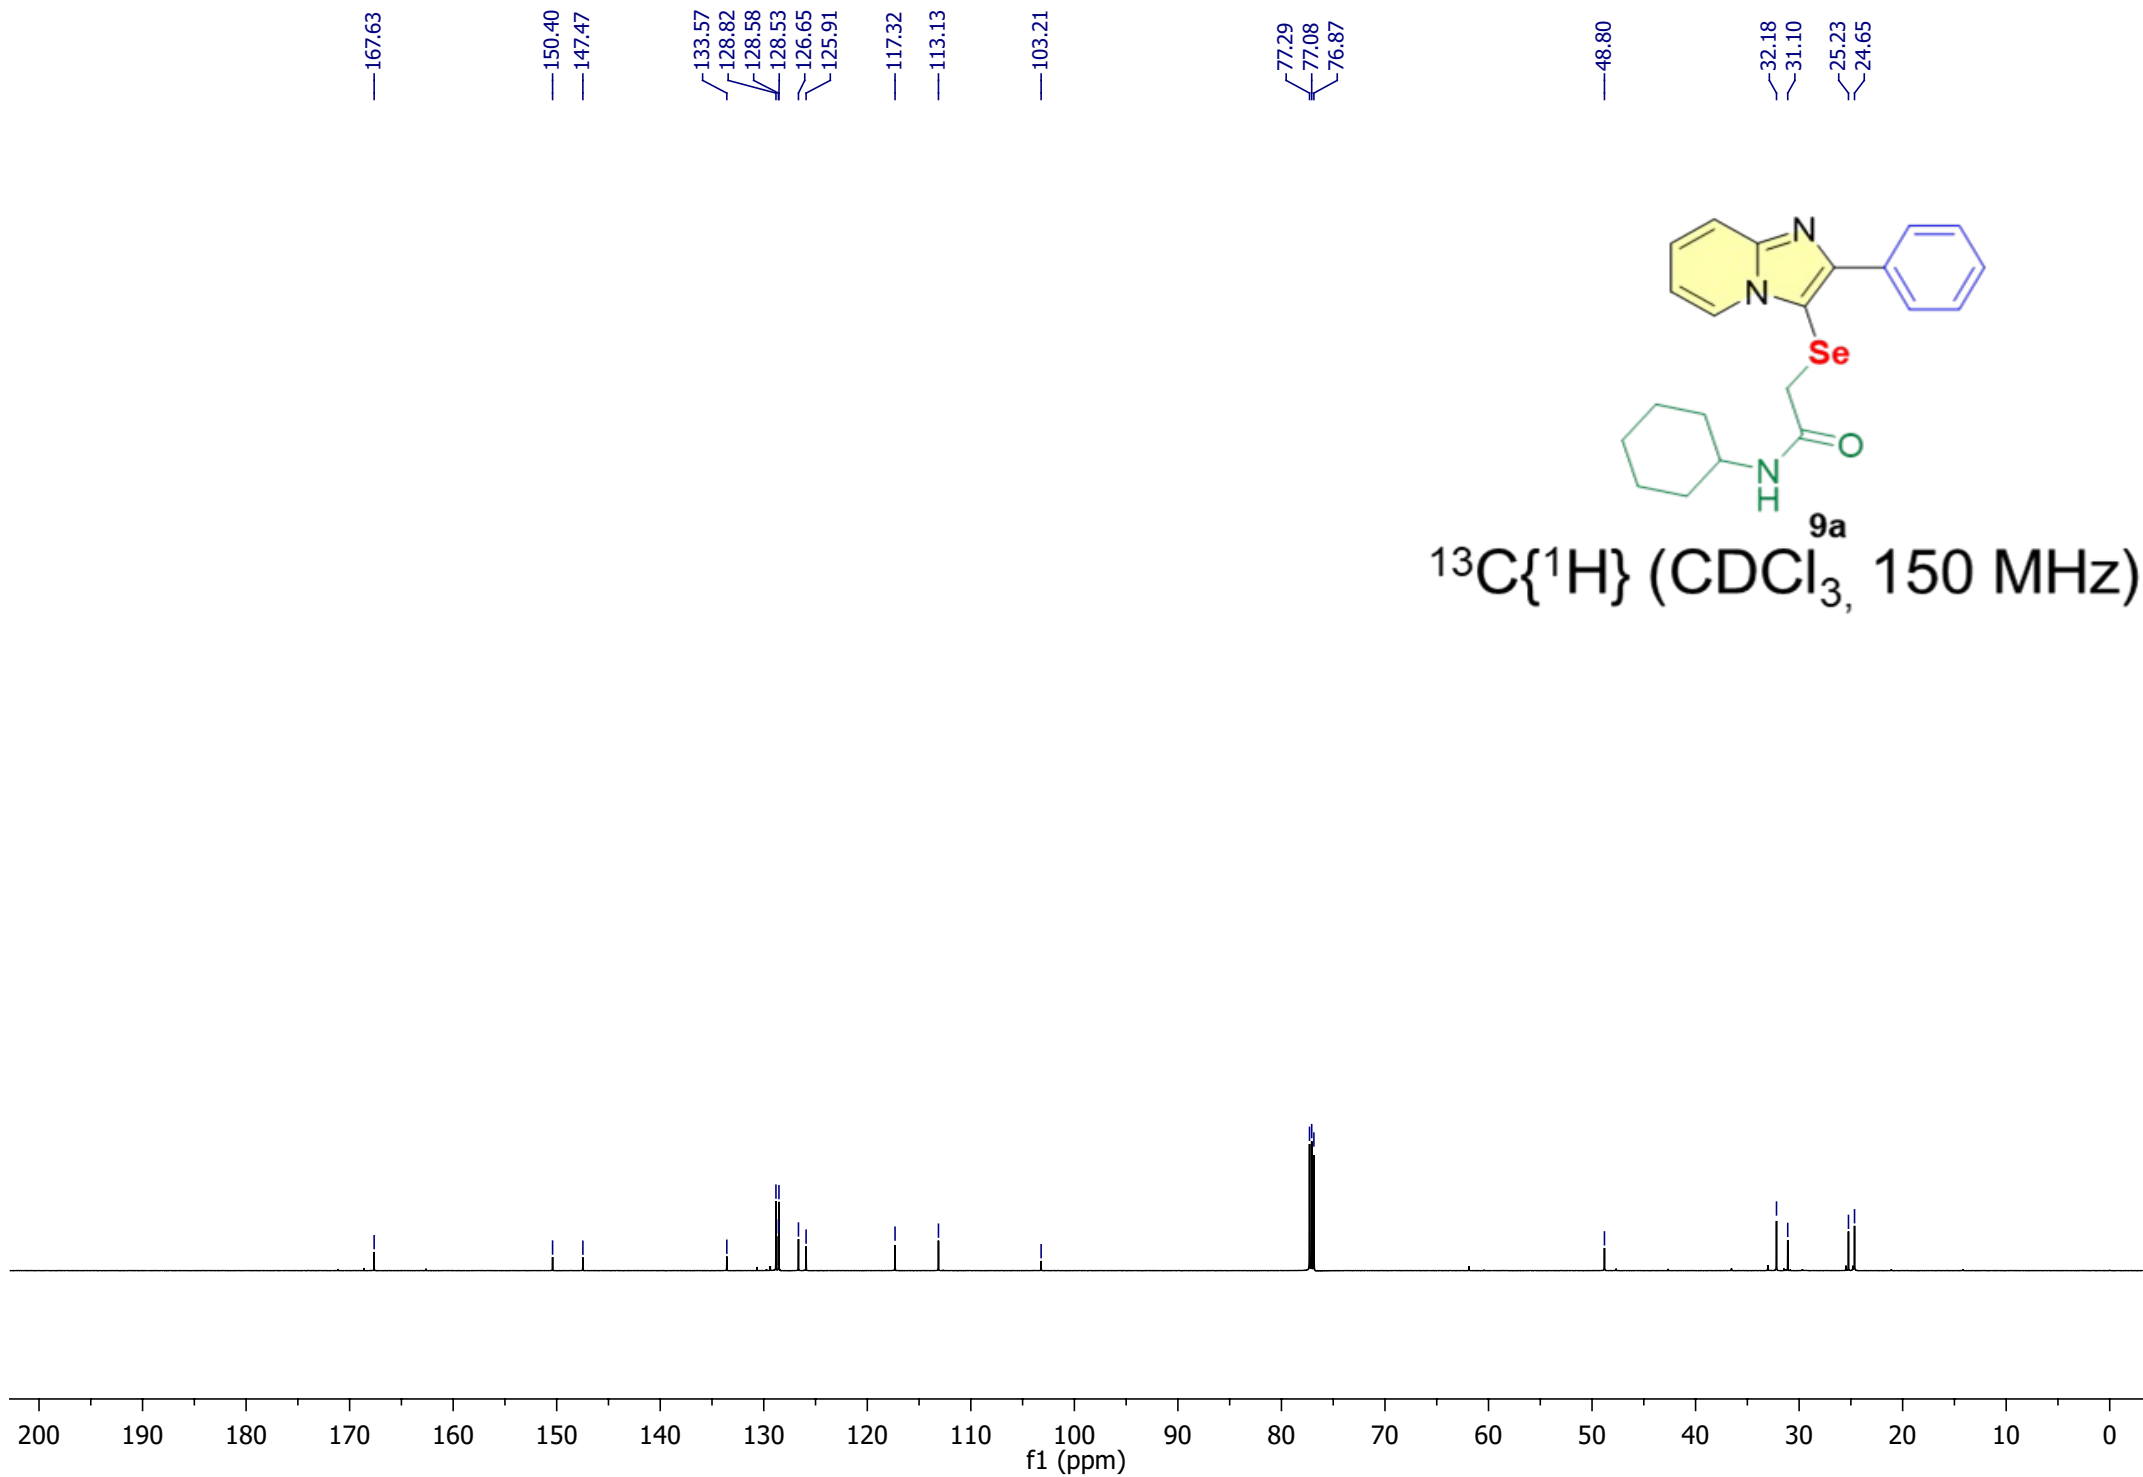

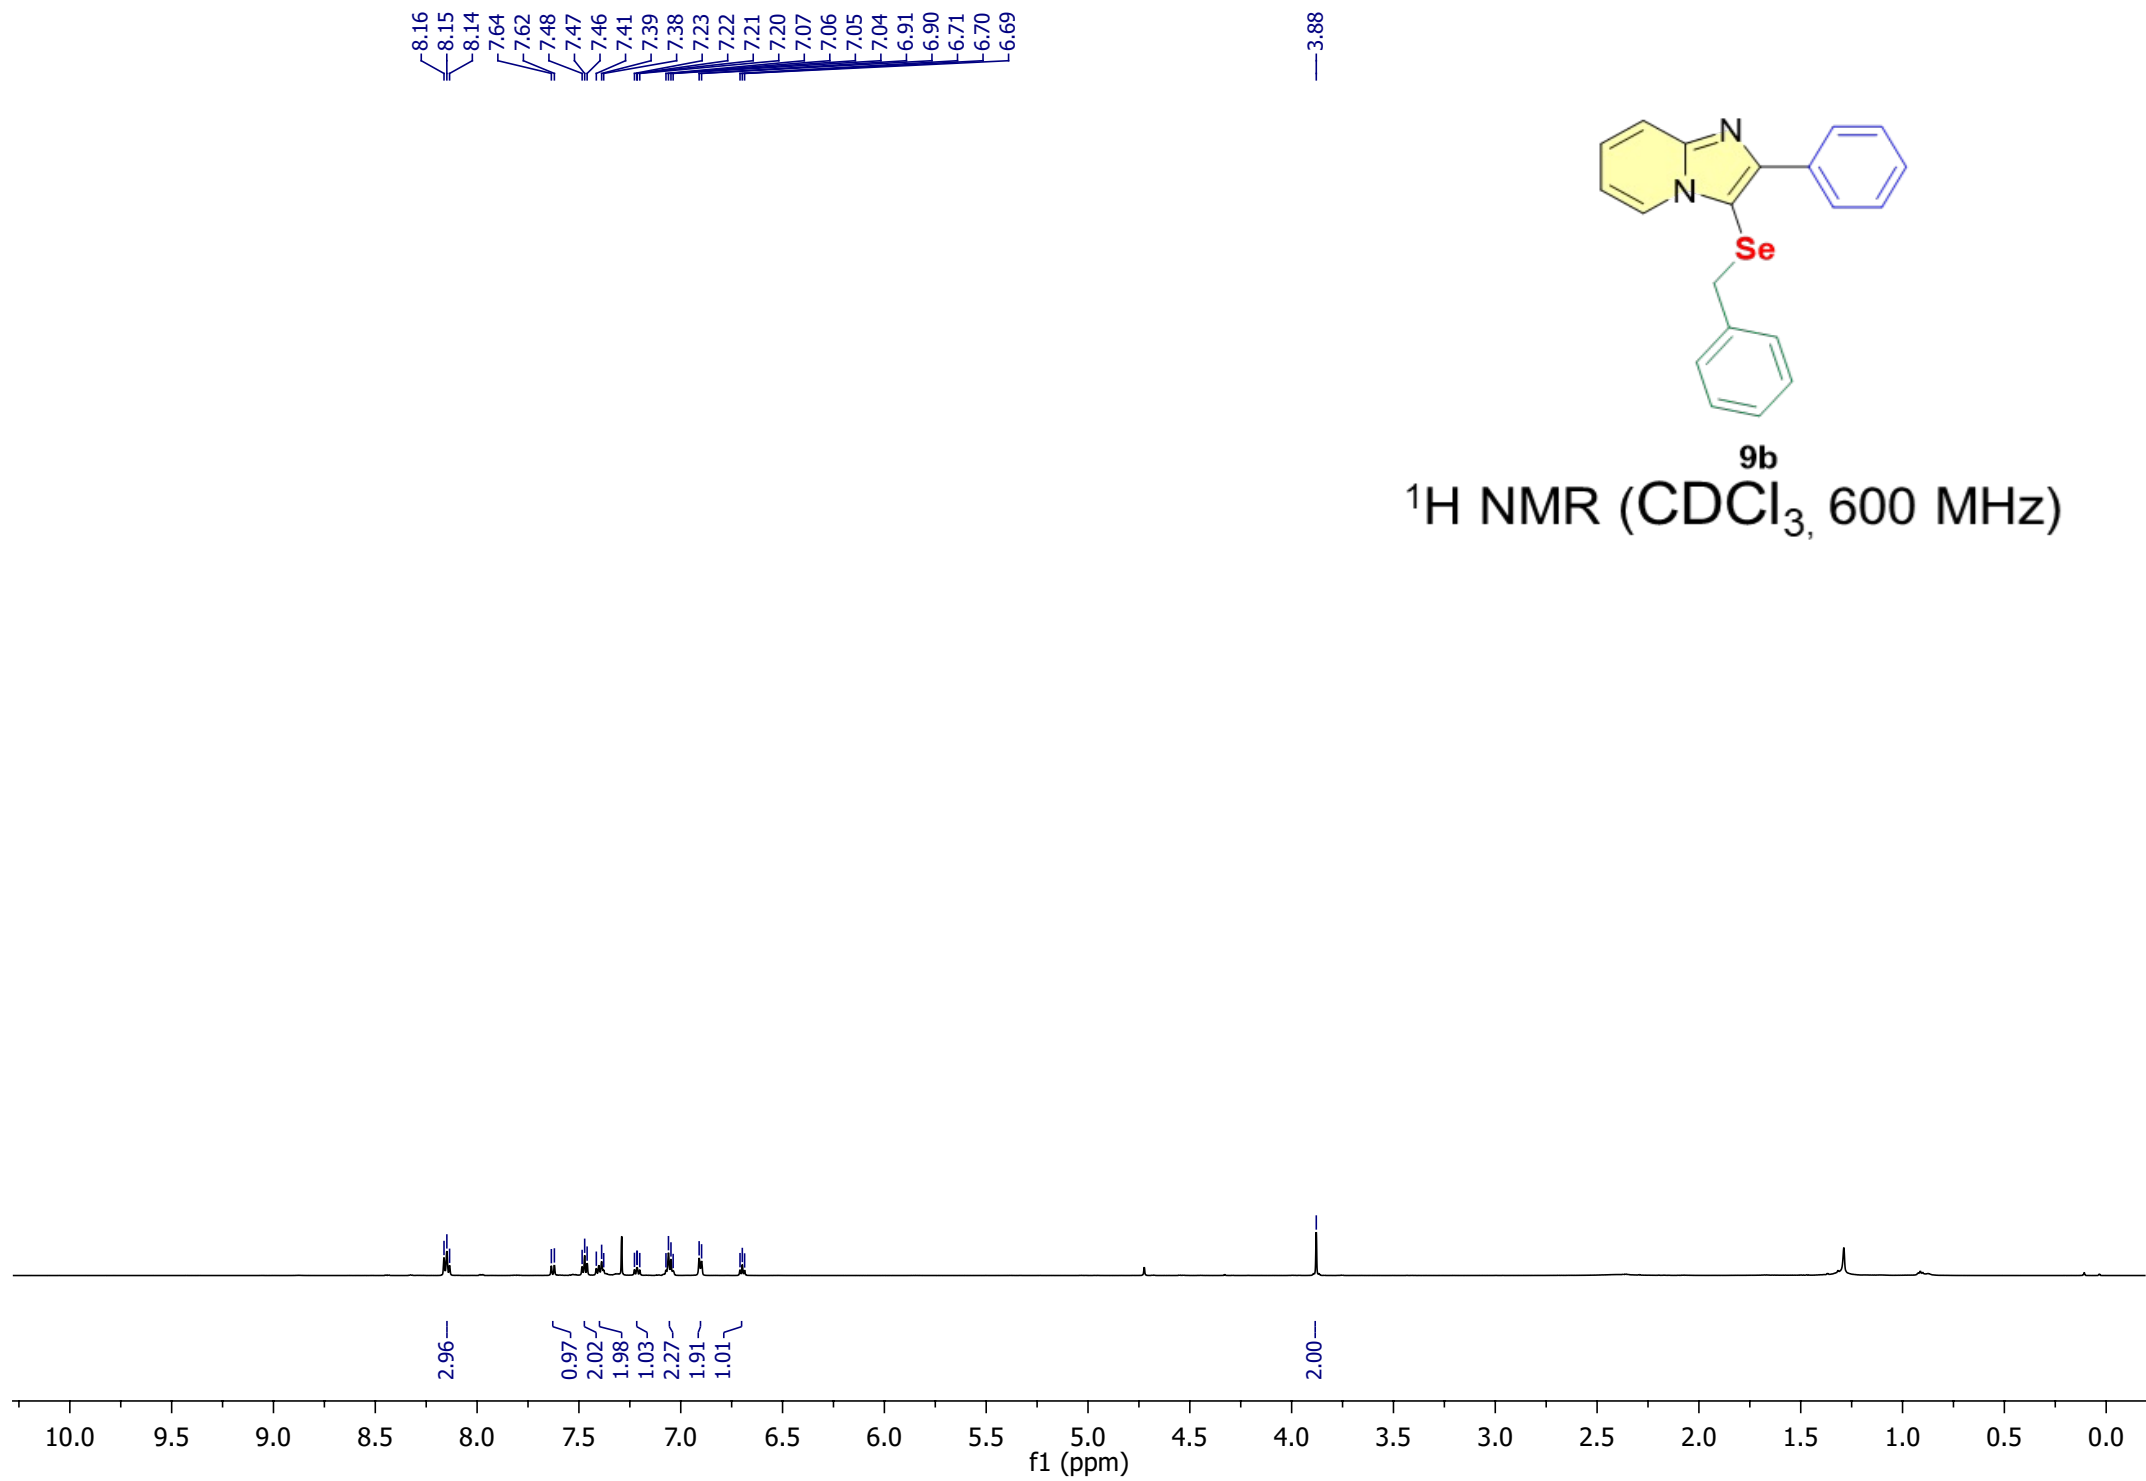

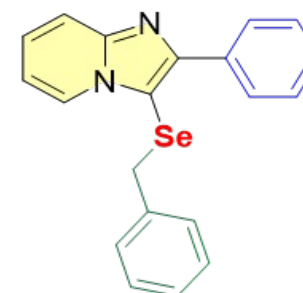

$^{13}\text{C}\{^1\text{H}\}$  ( $\text{CDCl}_3$ , 150 MHz)

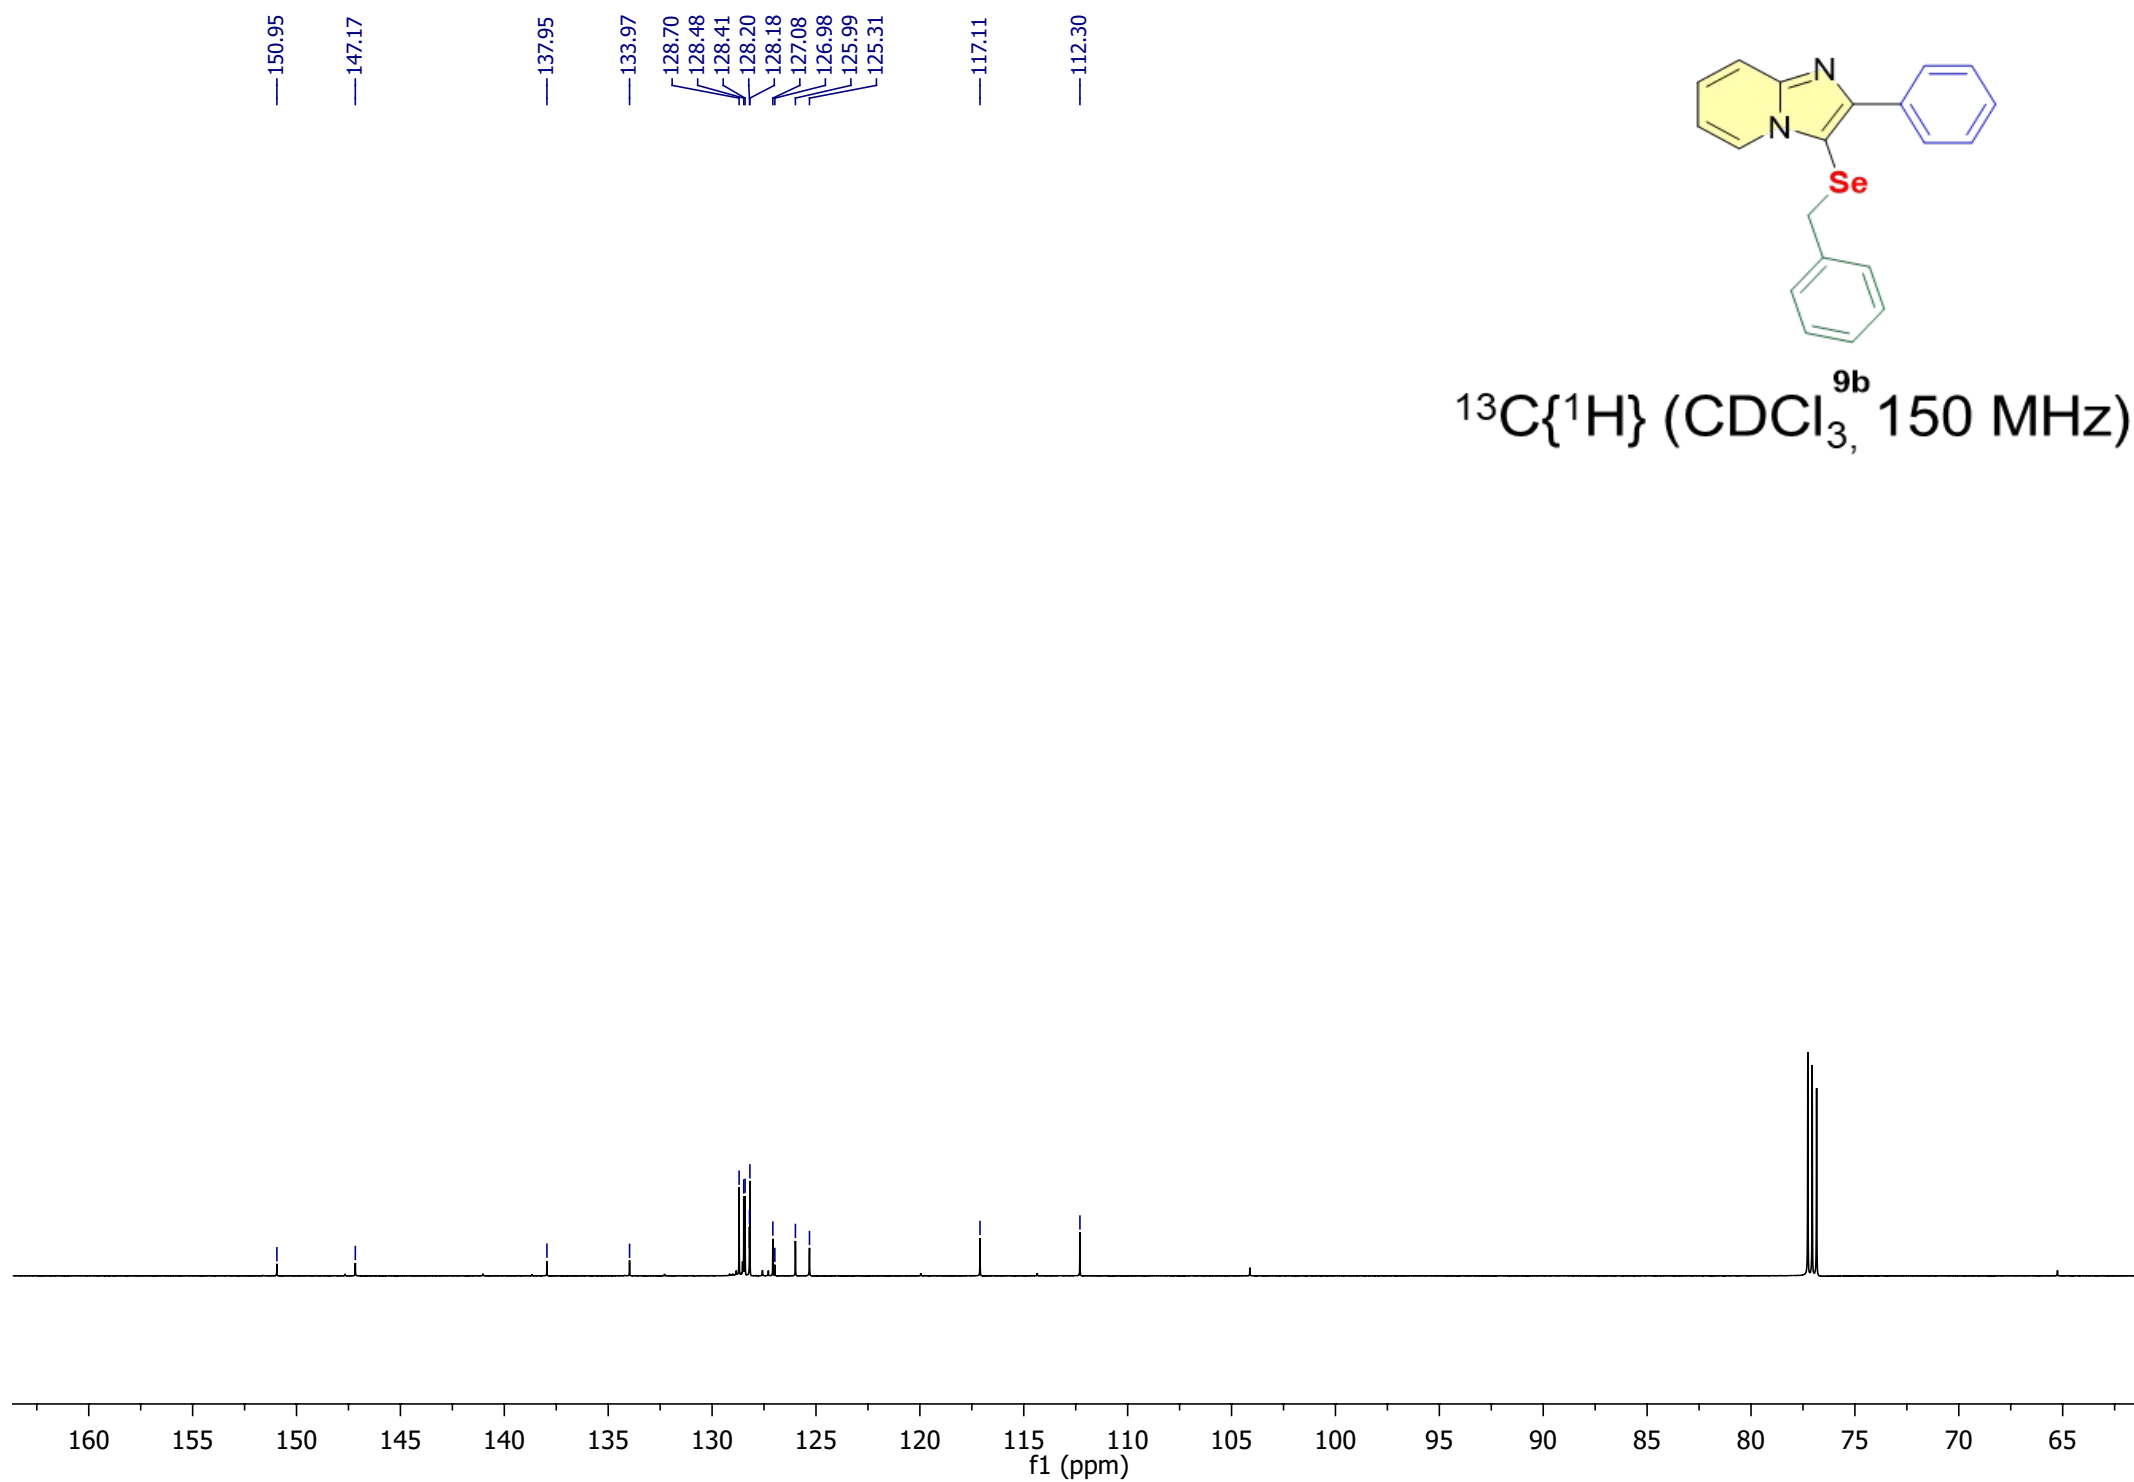

8.107  
8.098  
7.635  
7.212  
7.199  
7.136  
7.127  
7.092  
6.758  
6.747  
6.736

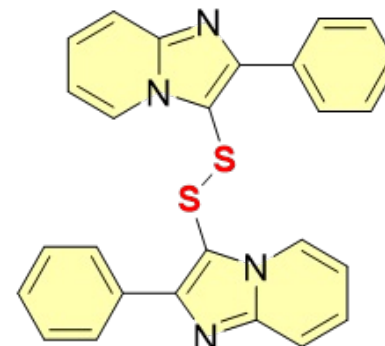

1aa

$^1\text{H}$  NMR ( $\text{CDCl}_3$ , 600 MHz)

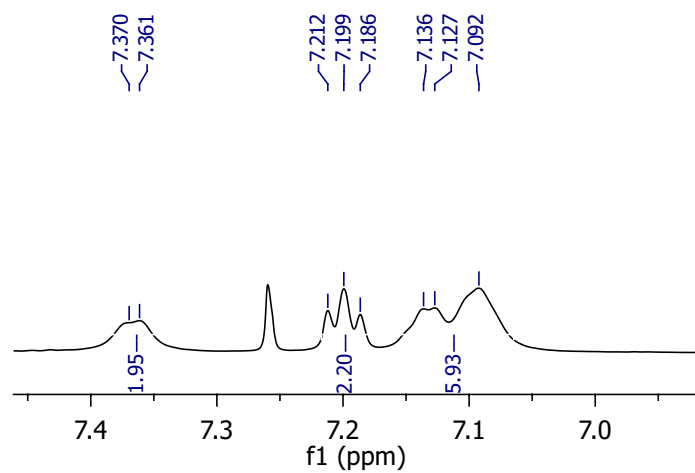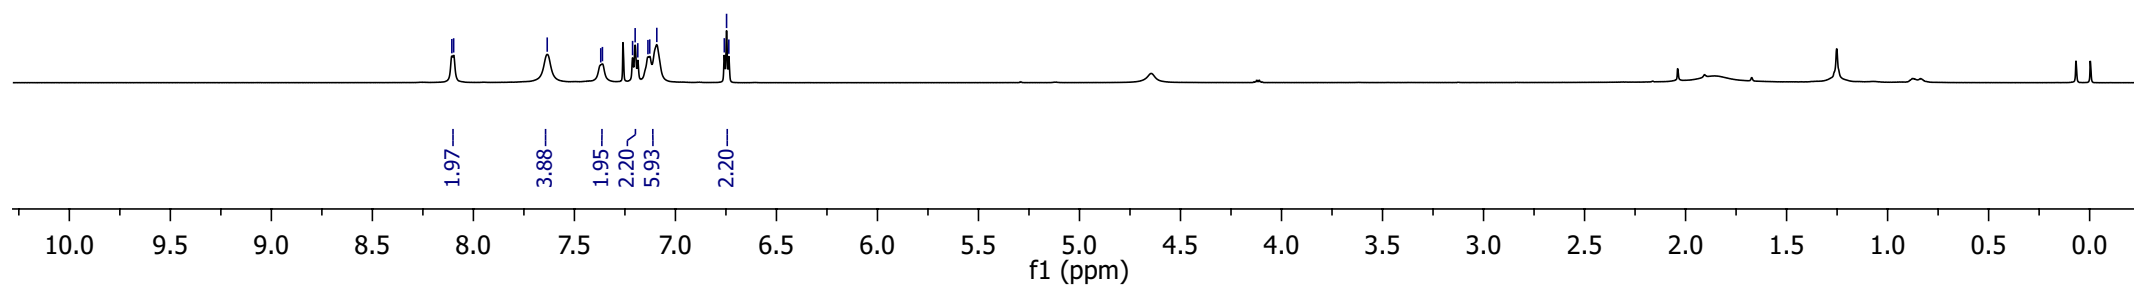

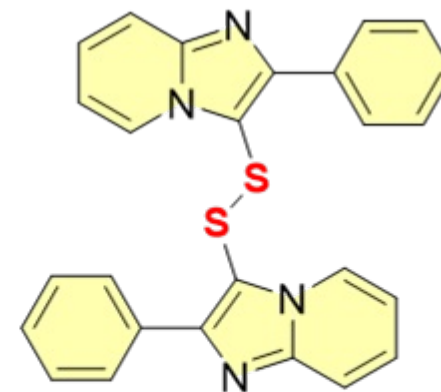

1aa

$^{13}\text{C}\{^1\text{H}\}$  ( $\text{CDCl}_3$ , 150 MHz)

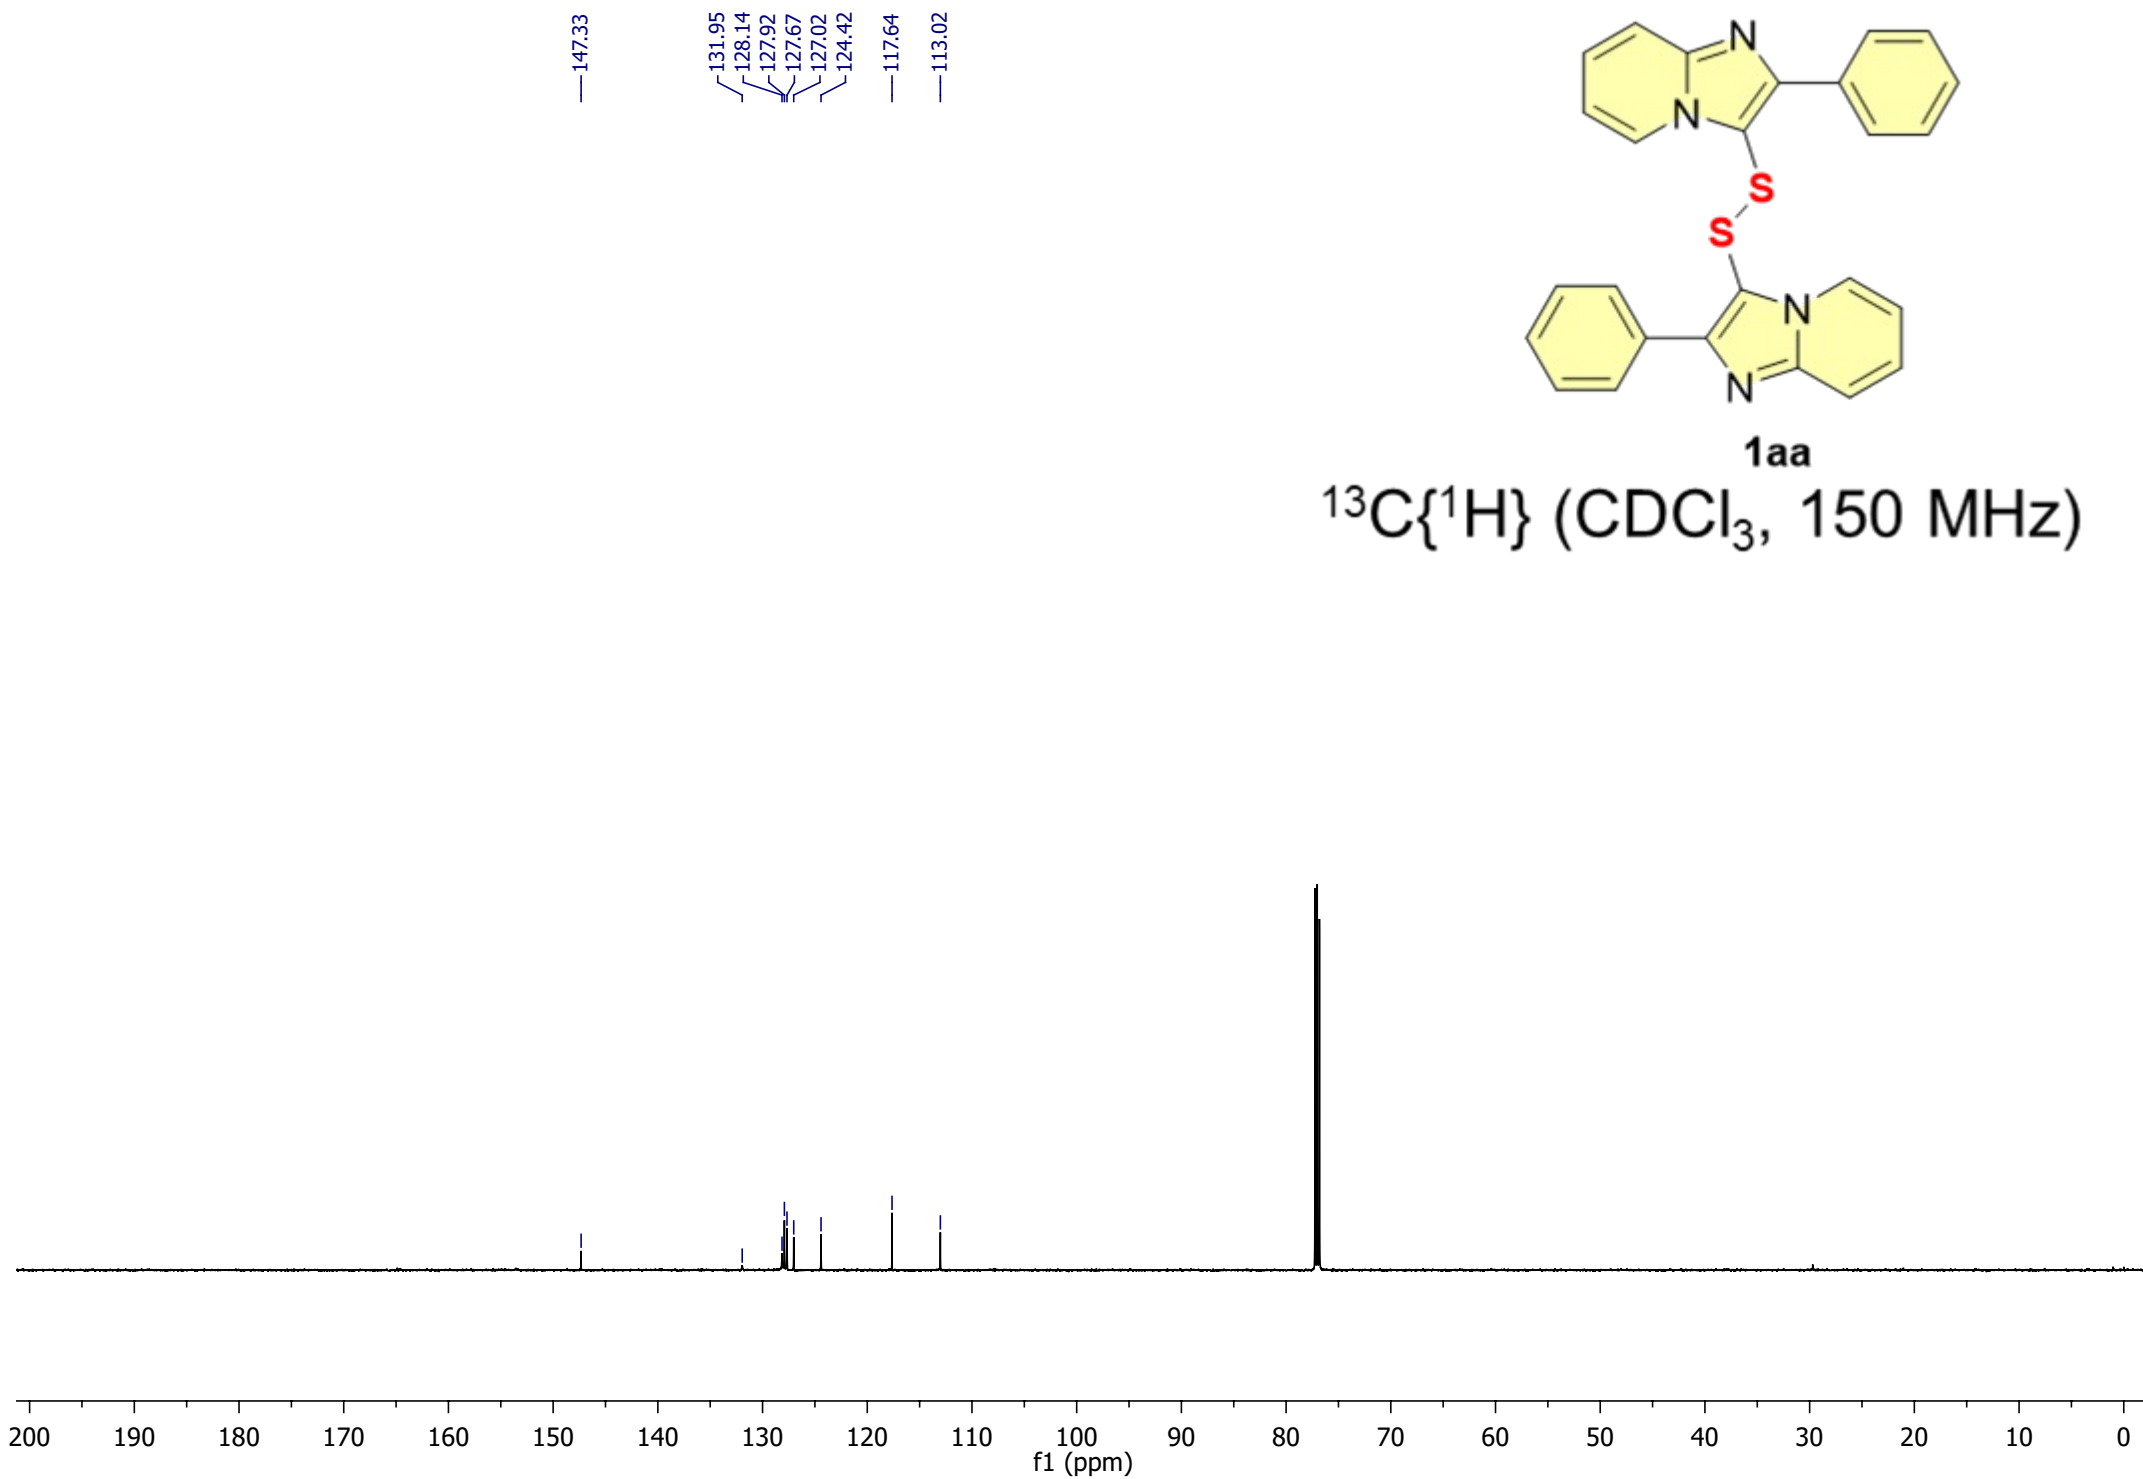

Supplement: d6nj00711b1.pdf [file d6nj00711b1.pdf]
